# Supplementary material for: The probiotic Propionibacterium freudenreichii as a new adjuvant for TRAIL-based therapy in colorectal cancer
Source: PubMed Central journal article supplement (PMC4872776; doi:10.18632/oncotarget.6881), 2016-01-11

**Supplementary Table 1 :**

| <b>TRAIL (n=314)</b> | <b>C3/C2 (n=2933)</b> | <b>SN (n=3408)</b> | <b>TRAIL + C3/C2 (n=33)</b> |
|----------------------|-----------------------|--------------------|-----------------------------|
| ACPT                 | IL10RB                | HDGFRP2            | RPS6KA1                     |
| XLOC_12_006021       | MARCH3                | CALML6             | CAMK1D                      |
| LRRC1                | FAM104A               | SLC7A5P1           | XLOC_008337                 |
| IRF1                 | SNORA12               | LOC645638          | CCRN4L                      |
| SNORA53              | C13orf15              | NR6A1              | ABCD3                       |
| LOC115110            | SCML1                 | LAMA5              | WNT7B                       |
| XLOC_003471          | GZF1                  | LDLRAD1            | CNP                         |
| PRRT2                | CCL27                 | ATP13A2            | MLF1                        |
| NRP2                 | GLTPD1                | MCTP2              | LINC00240                   |
| C8orf39              | LOC100653017          | CLIC3              | FAM110C                     |
| FOSB                 | ZNRD1-AS1             | LPCAT2             | SNORA42                     |
| SGPP2                | ARL17A                | SEC14L1            | FBXO31                      |
| IKBKE                | GIT2                  | PLA2G12A           | FAM102B                     |
| IL4R                 | G0S2                  | SNORD83A           | TBC1D22B                    |
| LOC100509780         | INPP4A                | ZNF30              | NUB1                        |
| LOXL4                | ZNF654                | RGS14              | CHD5                        |
| SNORD101             | RAB11FIP3             | TTC7B              | MLLT4                       |
| STAT5A               | WDR26                 | BBS12              | VWF                         |
| PTGER1               | AGSK1                 | SLC7A2             | HAUS6                       |
| LOC149773            | KIAA0895L             | CDH17              | SNX21                       |
| XLOC_002383          | PACSIN2               | MARCH3             | AMIGO3                      |
| XLOC_002736          | RECQL4                | NPIP               | TCEA3                       |
| IL27RA               | SOCS4                 | SNORD36C           | XLOC_12_011265              |
| MUC5AC               | WRAP53                | WNK2               | SULT1A4                     |
| TAPBP                | KCTD11                | GDI1               | LOC283174                   |
| LAMA3                | SNORD25               | LINS               | CDK2                        |
| BACH1                | NME7                  | SNORD48            | XLOC_006153                 |
| PRO0611              | CEP44                 | YIPF1              | PRO2852                     |
| XLOC_003665          | DOPEY1                | TBC1D9             | SERPINE2                    |
| PYGM                 | SPATA6                | KIF17              | SIGIRR                      |
| CMTM3                | PCSK5                 | ELMOD3             | TBC1D8B                     |
| IFNAR2               | CCDC17                | DNAJB11            | KIAA0664L3                  |
| EXOC3L4              | TSC1                  | CYB5R1             | LOC100132247                |
| XLOC_012229          | C1orf9                | LOC100132247       | MGC16121                    |
| NPW                  | IQCD                  | BRPF1              | STK32C                      |
| BATF3                | PIAS1                 | PSPN               | CXADRP3                     |
| XLOC_12_008031       | HES5                  | SH2D6              | LOC100506514                |
| CCDC17               | GTF2B                 | PPP1R12B           | RAB33A                      |
| LOC100128077         | XLOC_002921           | LPIN1              | SLC22A23                    |
| LOC728228            | P2RY6                 | FOXK2              | MXI1                        |
| GJB4                 | AMBRA1                | DFFA               | C1QTNF5                     |
| IL15RA               | MAPKBP1               | VWA1               | XLOC_011331                 |
| XLOC_006037          | STK17A                | SLC8A2             | XLOC_12_005076              |
| DUSP5                | XLOC_006138           | MAP3K9             | GLA                         |

|                |             |              |                |
|----------------|-------------|--------------|----------------|
| ZBTB46         | LOC728431   | RELL2        | MICAL1         |
| XLOC_12_013734 | XLOC_012586 | TRIM29       | FAM46A         |
| ICOSLG         | CBL         | LOC100288902 | NDOR1          |
| XLOC_004924    | RPRD1A      | ESYT1        | XLOC_008100    |
| LCE1B          | PLCE1       | NEK10        | SNORD30        |
| LAMC2          | PER2        | NUPL1        | GLIS3          |
| C15orf63       | LOC387895   | TP53INP2     | XLOC_006321    |
| XLOC_009677    | FAM65C      | PDXK         | XLOC_12_005438 |
| TAP1           | WDR83       | LOC100131089 | MAFK           |
| P51957         | PELI1       | ARPC4-TTLL3  | CSGALNACT2     |
| COL20A1        | GNRH1       | IVD          | SEC24A         |
| ALDOB          | GPC1        | CDC42BPB     | MLL3           |
| CXorf48        | CAPN12      | SUFU         | C12orf52       |
| C9orf128       | PP12719     | SLC38A10     | TMEM41A        |
| C6orf222       | TERF2       | FAM104A      | RPS6KL1        |
| IFNGR1         | GIT1        | USP37        | SPTSSA         |
| IGFBP1         | TNFRSF10B   | TGFBI        | XLOC_007262    |
| XLOC_000055    | HCP5        | CLMN         | GNAI3          |
| SYNGAP1        | FAM107B     | IL18         | LEPREL2        |
| TRIM31         | ZNF697      | IER3         | BNIP3L         |
| LOC100505940   | RASSF10     | VAT1         | XLOC_011765    |
| IL2RG          | KIF3C       | HLA-DOA      | LOC284837      |
| PRDM1          | SYT15       | SCARNA17     | AMD1           |
| ERVH-3         | GGT1        | DUSP13       | B3GAT3         |
| CD74           | ARHGEF18    | TSPAN13      | SNORA33        |
| XLOC_007214    | INSIG1      | ANXA1        | XLOC_12_006027 |
| LOC349196      | SNX25       | ATG4B        | XLOC_12_010963 |
| XLOC_014247    | SLC25A30    | LAMC2        | XLOC_12_007802 |
| WNT10A         | STARD3      | LOC100128001 | DMWD           |
| KRT17          | LOC284630   | GGTLC2       | LOC100130357   |
| VTRNA1-2       | ADIPOR2     | C17orf69     | XLOC_007813    |
| XLOC_014418    | SLCO1B1     | XLOC_002577  | SUSD2          |
| PIGR           | CGB         | PGS1         | SELK           |
| AQP7P1         | P39194      | C15orf48     | NAT14          |
| DAPP1          | HSPG2       | ZNF124       | UBXN7          |
| ATPAF1-AS1     | ZNF277      | ZNF280C      | XLOC_12_001138 |
| CBR3           | RLTPR       | SDF2         | GGT1           |
| CCDC108        | TM2D3       | AOC2         | XLOC_011223    |
| PDLIM4         | MIPEPP3     | UBOX5        | NRP2           |
| LOC553103      | ANKRD13D    | SLC30A1      | LOC100289511   |
| XLOC_000543    | ZNF695      | BCL3         | ZNF441         |
| FLT3LG         | XLOC_012624 | KATNB1       | MGC23284       |
| DIO3OS         | FHL3        | LIPH         | ZNF284         |
| IRAK2          | TAOK2       | DPYSL3       | FLJ39051       |
| LCE1C          | ODF2        | SYNJ2        | XLOC_013350    |
| KIRREL3        | C9orf5      | SMG1         | MGAT4A         |
| TNIP1          | LAMB2       | LOC100507018 | SLC23A2        |
| CDKN1A         | ACOX1       | C14orf43     | RAB11FIP3      |

|                |                |              |             |
|----------------|----------------|--------------|-------------|
| SPIB           | XLOC_12_007427 | LOC100506305 | PHRF1       |
| PPP1R14D       | PC             | CLU          | RCAN2       |
| AQP10          | PPP1R18        | MLF1         | FUCA1       |
| TRIB2          | PCDH1          | TMEM120B     | LPIN1       |
| RND1           | PPP1R12C       | SEC16A       | AKAP5       |
| KRT6B          | TTYH3          | CEP68        | AREG        |
| AKAP4          | CHAF1A         | CASP9        | PPP1R12B    |
| CDRT1          | DNAJC6         | CIC          | PGAP1       |
| FLJ31104       | LOC100506990   | PELI2        | TNFRSF13C   |
| IGFL4          | PLEKHO2        | USP32P2      | DOPEY1      |
| SDR16C5        | WFS1           | CTU2         | C1orf210    |
| XLOC_12_005933 | HKDC1          | LIPG         | RASA4       |
| XLOC_12_013120 | MAN1B1         | XLOC_013914  | XLOC_011521 |
| LOC387895      | XLOC_004122    | DRAP1        | CHN2        |
| XLOC_12_008595 | SYNJ1          | PER2         | C1QTNF8     |
| C12orf61       | XLOC_12_013730 | SNX29        | PANK3       |
| RNU4ATAC       | SMOX           | FADS2        | UBR2        |
| XLOC_006080    | POLR2J4        | PVR          | CEP112      |
| IL3RA          | PAIP2B         | DENND4C      | SSBP3       |
| XLOC_003327    | TRIM3          | PTGS2        | ZNF608      |
| SERPINA3       | DGKQ           | C6orf228     | INO80B      |
| PSORS1C3       | FANCM          | CKM          | FAM135A     |
| AKT1S1         | HSPA1A         | POGZ         | LAMA3       |
| S100A3         | GBA2           | FBXO15       | CIDEC       |
| LOC100509620   | AGT            | PMP22        | CYP2D6      |
| RTP1           | HIST3H2A       | B4GALNT3     | NFKBIB      |
| SH2D1B         | XLOC_008678    | XPR1         | SRGAP2      |
| LOC642422      | CBX7           | RAP2B        | LACTB       |
| XLOC_004747    | SYT13          | POTED        | QSOX1       |
| XLOC_12_015038 | GYG2           | XLOC_012530  | CYP4F35P    |
| SSC5D          | LOC100652797   | TRIP10       | CREB3       |
| MCCD1          | XLOC_000111    | PHGDH        | MPRIP       |
| NFKBIA         | SYNGAP1        | psiTPTE22    | GNAI2       |
| NEURL3         | HES2           | CA12         | TSPYL2      |
| SDC4           | GRID2IP        | SNORA12      | FAM100B     |
| PPP4R1L        | PRINS          | RBM4         | LOC650368   |
| SPRR1A         | XLOC_12_007928 | CALU         | OPN3        |
| IL1B           | GDPD5          | LINC00483    | TTYH3       |
| BCL3           | FBXO16         | KIAA2013     | CD109       |
| XLOC_010031    | PTPN1          | EID2B        | LOC400958   |
| PDGFB          | XLOC_009122    | WRAP53       | SNHG5       |
| LOC284570      | IQCE           | LAMB1        | FAM171A2    |
| XLOC_010245    | KIAA1432       | SNORD89      | GPER        |
| UNC5C          | PALLD          | MAP7D1       | ARHGEF18    |
| MCAM           | SPTSSA         | PTPN1        | TAF13       |
| NAV3           | ZNF555         | RHOU         | SNORA80B    |
| RNF207         | ID3            | FAHD1        | FAM132A     |
| IL23A          | STRA6          | XLOC_008916  | XLOC_012679 |

|                |                |                |              |
|----------------|----------------|----------------|--------------|
| CFLAR-AS1      | RAPH1          | PREPL          | C8orf47      |
| TTY5           | SERPINA6       | CD46           | USP15        |
| CPNE5          | PRAF2          | ELL            | LOC100653016 |
| LINGO1         | PAOX           | TTLL1          | LOC100506714 |
| TRIM42         | INSIG2         | GNB1L          | CARHSP1      |
| XLOC_007438    | SPATA13        | C9orf85        | WDR26        |
| PTGS2          | WIPI2          | STAT3          | ARHGAP44     |
| XLOC_001537    | TBC1D10A       | XLOC_12_007644 | LOC100129380 |
| XLOC_009361    | XLOC_001023    | MYH9           | MMP25        |
| XLOC_12_004706 | PKD1           | QSOX2          | C2CD4A       |
| CX3CL1         | SNX29          | LOC100507006   | LOC100507487 |
| ICAM2          | FBRSL1         | CRABP2         | POFUT2       |
| XLOC_009791    | C5AR1          | C12orf70       | ZNF511       |
| XLOC_005747    | C19orf59       | LOC283710      | DYNLT1       |
| CNRIP1         | LOC100506821   | PFKFB3         | FKBPL        |
| NFKBIE         | XLOC_12_015964 | MAD2L2         | ZNF77        |
| XLOC_12_005667 | KIDINS220      | KDM4B          | LOC284072    |
| TNFRSF6B       | APBB3          | TSC2           | PLB1         |
| SEMA7A         | NINJ1          | RNF149         | SNORD83A     |
| SPATA8         | DNHD1          | PLIN2          | COL20A1      |
| TNFAIP2        | MAP3K3         | INPP5A         | NAV1         |
| XLOC_009826    | KIAA0226       | DOCK6          | XLOC_000670  |
| XLOC_003093    | TPTE           | CCDC88B        | HPN          |
| KLK10          | DRAM1          | LRP1           | NPRL2        |
| ZNF331         | LOC254100      | PTPRJ          | SLC22A1      |
| TMEM31         | LINC00299      | ABCD1          | C2CD4C       |
| XLOC_000114    | TBC1D8B        | XLOC_001099    | XLOC_012945  |
| IL32           | FAM167B        | LOC100131829   | C12orf44     |
| LOC100505966   | XLOC_011448    | GALNS          | ARHGEF19     |
| LOC100288432   | RIPK4          | SLC2A6         | MKL1         |
| PP12613        | CLCNKB         | PIP4K2A        | ZGPAT        |
| ASB2           | C1orf226       | SORT1          | FCAMR        |
| XLOC_000842    | SLC2A8         | XLOC_013413    | TPPP         |
| DIO3           | ZSWIM4         | WDR66          | MAP6D1       |
| CACNA2D3       | RAB40B         | SOX12          | LOC100507420 |
| CD83           | SEC24A         | SNORD83B       | SLC25A28     |
| LOC100129119   | DUSP8          | UPK1A          | ELMOD3       |
| LOC100506178   | DEFB1          | C1orf81        | C15orf39     |
| SPAG17         | RARA           | MT1X           | GATA2        |
| NFKB2          | FUZ            | FRMD8          | C6orf47      |
| SNORD116-19    | MGC23284       | MALAT1         | PMPCA        |
| ITGAM          | GAGE2B         | C9orf140       | ACOT7        |
| MMP2           | ASPG           | XLOC_12_015034 | FAM167B      |
| ICAM1          | PDLIM7         | NCOA3          | BMP8B        |
| XLOC_000545    | XLOC_011223    | HCP5           | KIAA1804     |
| XLOC_011559    | GGT3P          | GCAT           | HLA-DOA      |
| CXCL6          | GAS2L2         | MTHFD2L        | MAX          |
| GPR37L1        | CITED2         | XLOC_008781    | C17orf76     |

|                |                |                |                |
|----------------|----------------|----------------|----------------|
| LOC100616530   | GSTT2B         | CDC34          | ZNF774         |
| LOXHD1         | C9orf89        | ZNF295         | XLOC_006037    |
| PLAU           | TBC1D8         | QPCTL          | GCH1           |
| LOC646168      | LOC100507336   | PNMA1          | XLOC_014243    |
| LOC100505473   | UBR4           | LOC100499467   | POU3F1         |
| XLOC_12_014821 | OR13A1         | NDNF           | OR13A1         |
| HOXD12         | HAUS6          | FAM135A        | IL6ST          |
| ZNF503-AS1     | LOC100506714   | EPB41L2        | E2F2           |
| OTOGL          | XLOC_001856    | SYNGR1         | RFPL3-AS1      |
| LOC728763      | XLOC_006613    | LOC100509213   | XLOC_010238    |
| XLOC_003736    | VCL            | APBB3          | TMEM2          |
| SH2D2A         | LRRC69         | GRINA          | ATP2B4         |
| HSD52          | LCAT           | NCF1           | ACADSB         |
| PKD1L3         | UBE2Q2P3       | NPL            | XLOC_12_004771 |
| CTLA4          | MPZL3          | POU3F1         | C1orf9         |
| DNAH5          | SH2D6          | DNAH2          | FANCM          |
| LOC100128517   | RASA4          | SPTSSA         | GRK5           |
| C12orf12       | TNFRSF13C      | XLOC_001537    | GGTLC2         |
| LOC100505869   | ECE1           | LOC100507165   | MAD2L2         |
| FLJ43390       | XLOC_12_011204 | XLOC_009122    | CLDN9          |
| LOC100128095   | ELL            | ATP6V0B        | MALAT1         |
| HCN4           | ZNF774         | XLOC_12_004640 | LOC100129399   |
| XLOC_003965    | ZNF821         | XLOC_000043    | HIST3H2A       |
| XLOC_003791    | MICALL2        | SLC26A6        | SLMAP          |
| 1/2-SBSRNA4    | NUAK2          | XLOC_000683    | LOC729513      |
| UNC5D          | ARL6           | CHN2           | XLOC_12_009501 |
| XLOC_001128    | C2orf44        | ZHX3           | PKD1           |
| C2CD4B         | DNAH6          | GMCL1          | NCK2           |
| CXCL3          | LOC283174      | KIAA1609       | SYT13          |
| XLOC_002688    | SNHG7          | SHANK2         | PAQR4          |
| XLOC_013531    | PIK3R3         | NPM2           | SGPP2          |
| LOC399708      | XLOC_009944    | PP12719        | SLC7A5         |
| XLOC_003668    | LINC00483      | LOC100506848   | KIAA0907       |
| XLOC_006999    | JMJD7-PLA2G4B  | AKIRIN1        | FLJ23867       |
| LOC100130278   | CYP2C18        | C1orf170       | ZNF709         |
| LOC100506048   | DOCK6          | EFNA5          | ANAPC2         |
| ATP6V0D2       | ZFP90          | ZIC5           | UCA1           |
| XLOC_008625    | C2CD4A         | CROCC          | HCAR3          |
| RELB           | LOC100506713   | CMIP           | FLVCR1-AS1     |
| LY86-AS1       | MIA3           | PPFIA3         | CD86           |
| XLOC_12_009180 | SDC4           | SLC25A29       | PCYT2          |
| XLOC_006456    | CNN3           | FXR2           | ATG4B          |
| ART1           | NOXA1          | SERPINA4       | NOXA1          |
| MPP4           | Q8WNA4         | HRASLS2        | LRRC69         |
| LOC400499      | DTX2           | GYLTL1B        | SCML1          |
| CSF2           | MPRIP          | PPP1R13L       | NQO2           |
| FLJ42842       | CARD14         | FLJ39051       | XLOC_12_006745 |
| PI3            | SEPP1          | PAQR4          | POTEE          |

|                |              |              |              |
|----------------|--------------|--------------|--------------|
| STOML3         | LOC100507580 | LOC100505675 | CHD4         |
| LDLRAD2        | NOSIP        | MARCH9       | HYAL3        |
| XLOC_000856    | BAK1         | CSNK1E       | FLJ32224     |
| XLOC_12_008190 | PLB1         | DBNDD1       | PHKG2        |
| CXCL10         | LOC100506848 | RTBDN        | DENND5A      |
| TNFAIP3        | PSPN         | DUSP14       | LTBP3        |
| POM121L8P      | DAAM1        | MAX          | XLOC_006138  |
| XLOC_000824    | MOB2         | N4BP1        | PQLC1        |
| TMPRSS11B      | SUN1         | EXOC3L4      | ING2         |
| XLOC_011881    | NQO2         | CDH1         | DFFA         |
| XLOC_006485    | TRIM62       | LOC728431    | PPFIA1       |
| FLJ33534       | MAD2L2       | FAM106CP     | CYP26A1      |
| C3orf55        | XLOC_013072  | DPM2         | TAF3         |
| CXCL2          | FAM132A      | C3orf71      | TMEM120B     |
| XLOC_12_003888 | RBM38        | GGN          | EPB41L5      |
| XLOC_011326    | TUBGCP6      | GGCX         | RIMKLA       |
| XLOC_011614    | SEC14L1      | S100A14      | STX7         |
| TAS2R16        | CASKIN2      | FAM83F       | RPS6KB1      |
| XLOC_011289    | FLCN         | OR2AG1       | LOC100509213 |
| LOC100506571   | FLJ90757     | NBR2         | DNHD1        |
| LOC441204      | CAV1         | PI4KA        | CEP68        |
| CRB1           | SPSB3        | C3orf18      | BICD2        |
| XLOC_006398    | AKAP5        | LOC254100    | GMCL1        |
| XLOC_009713    | XLOC_006994  | CD82         | SH3D21       |
| TMEM132B       | GNL1         | MACF1        | MYADM        |
| LOC440970      | RPL28        | SEPP1        | LOC100132495 |
| XLOC_011378    | XLOC_013732  | PML          | ETS1         |
| XLOC_000324    | TMEM92       | XLOC_001441  | ZNF503       |
| PRKG1          | AMN1         | XLOC_000340  | LOC100506312 |
| XLOC_12_008450 | SGK223       | C5orf45      | RNF213       |
| XLOC_12_010258 | FNBP1        | SAMD4B       | ZNF124       |
| XLOC_009661    | RHOA         | C6orf25      | SNRNP48      |
| CABP2          | SNORD22      | GALNT2       | XLOC_014388  |
| XLOC_008366    | SEC1         | LOC100506123 | HEBP1        |
| XLOC_007093    | SLC22A1      | ST14         | HHEX         |
| BIRC3          | XLOC_002185  | INSIG1       | ND1          |
| MYO18B         | PPP1R9B      | XLOC_011805  | SPDYE5       |
| ADCYAP1        | CDKL5        | TCFL5        | CT62         |
| FAM205B        | DNAJC12      | KIAA0895L    | AKIRIN1      |
| Q6TXI9         | MKLN1        | OCLN         | OTUD3        |
| TMEM229B       | VWF          | CXorf40B     | C21orf56     |
| LOC157381      | BAI1         | AAMP         | PLAU         |
| XLOC_003636    | AIF1L        | SPN          | SYNE1        |
| ECSCR          | GSTT2        | FANCE        | STRA6        |
| XLOC_011421    | FRMD8        | DHX16        | GLTPD1       |
| SLITRK2        | NARF         | ANKRD11      | MFAP2        |
| XLOC_12_006138 | TCP10        | NDOR1        | C10orf118    |
| XLOC_003754    | PECAM1       | FBXW10       | RNF19B       |

|                |              |                |              |
|----------------|--------------|----------------|--------------|
| LOC286114      | ZNF519       | C20orf96       | PECAM1       |
| XLOC_12_014217 | CRY1         | FBXO31         | GZF1         |
| XLOC_001067    | LILRB3       | INPP5F         | AFAP1        |
| XLOC_007545    | GYLTL1B      | XLOC_12_009571 | LRRC31       |
| XLOC_009546    | GRIN2C       | CHP2           | SPOCK2       |
| XLOC_001676    | MUC1         | NR3C2          | RHOBTB3      |
| SHROOM2        | MALAT1       | SNX27          | XLOC_005273  |
| XLOC_007916    | DCUN1D2      | NSAP11         | CEP170       |
| XLOC_000955    | ATP7A        | HYAL3          | BDNF         |
| OR14A16        | XLOC_001748  | ZRANB1         | C9orf85      |
| XLOC_011350    | RGS2         | SLC38A2        | XLOC_002133  |
| FGF14          | FLVCR1       | CEP19          | RAP2B        |
| CXCL1          | TMED6        | FGFRL1         | AFF4         |
| LOC100507096   | C7orf60      | DRD4           | TRIM25       |
| XLOC_001483    | SLC38A2      | UCN            | GAS2L2       |
| C10orf120      | KRT23        | SOCS4          | KRTAP3-1     |
| XLOC_12_013149 | FAM131B      | LOC100130745   | PDE4D        |
| CILP           | GNAI3        | SNAPC1         | SLC5A3       |
| IL17C          | MYO1E        | PPM1K          | SAMD4A       |
| ICAM4          | SNORA68      | IL1RAP         | TCIRG1       |
| XLOC_007727    | LAMB2P1      | NOXA1          | RAB17        |
| XLOC_006620    | KLHL28       | TBX10          | TRIM26       |
| PRDM16         | XLOC_002987  | HSPA5          | MRGPRF       |
| CFHR1          | SLC31A1      | SNHG7          | TMEM136      |
| IL8            | XLOC_001537  | C2orf81        | C16orf86     |
| IL4I1          | MKL1         | AP2A1          | CACNG8       |
| LTB            | CNTNAP2      | PAQR3          | FLJ43663     |
| TNF            | LOC643650    | TBC1D22B       | NPAS2        |
| CCL20          | FBXO15       | PAQR5          | SYNGAP1      |
| UBD            | CXADR        | HSD17B3        | ARMC2        |
|                | LOC440934    | PRKD2          | AIF1L        |
|                | CPLX1        | AGFG2          | LOC100287728 |
|                | ZNF79        | CDH24          | NUP43        |
|                | LOC100507800 | SLC25A28       | NOTCH1       |
|                | SNX27        | GPT            | APBB3        |
|                | RGN          | SERPINA6       | DAND5        |
|                | SARDH        | LOC100131820   | RLF          |
|                | CIDEC        | ADHFE1         | PCBP4        |
|                | TESK1        | HCFC2          | CGRRF1       |
|                | HSPC072      | CCDC69         | KIAA0895     |
|                | ZNF324B      | PRO0628        | NARF         |
|                | RTN4R        | SH3D21         | P51957       |
|                | LEPREL2      | ETV5           | LOC100506990 |
|                | FOS          | GOLGA6L9       | CCDC85B      |
|                | TNFSF15      | RASSF6         | CYP2C18      |
|                | SLC7A2       | XLOC_005566    | MOSPD3       |
|                | SERPINF1     | SYTL4          | KIAA0319     |
|                | NPC1         | DNAJB13        | STAMPB       |



|                |                |                |
|----------------|----------------|----------------|
| LIPA           | XLOC_12_004371 | XLOC_12_015038 |
| RHOBTB2        | NQO2           | XLOC_006291    |
| TMEM41B        | MXRA7          | FLJ21369       |
| PTPRE          | MCFD2          | RAB43          |
| XLOC_004590    | CXADRP3        | AQP7P1         |
| SLC7A5         | BAIAP2L1       | ENPP1          |
| XLOC_000683    | ISG20          | NNAT           |
| AAK1           | LAT2           | KIAA1549       |
| RCAN2          | EPHB3          | AAK1           |
| L1CAM          | XLOC_013350    | LOC100505904   |
| RECK           | FAM25A         | PMM1           |
| XLOC_009943    | RAB43          | SMG1           |
| ZNF778         | CCDC75         | GGCX           |
| TBC1D16        | HK1            | SNORA80        |
| psiTPTE22      | PHF20L1        | FAM27A         |
| C17orf51       | BNIP1          | TSPAN32        |
| ZNF584         | ABHD3          | LOC100652766   |
| HPSE           | GRIK1-AS1      | GAN            |
| XLOC_005361    | KIAA1671       | XLOC_008353    |
| KIAA1539       | CCBL1          | CCND3          |
| ZBTB80S        | ZNF10          | SYNGR1         |
| ZFAND5         | GGT1           | CREB3L2        |
| XLOC_012162    | JDP2           | CPLX1          |
| DNAJC5         | SRPK2          | SH3BP2         |
| GOLGA6L10      | SCAP           | C21orf91       |
| FGFR1OP2       | XLOC_003480    | CPSF3L         |
| SNHG12         | CREB3L2        | ACSS2          |
| XLOC_004827    | IRAK2          | XLOC_005244    |
| SPATA2L        | HIPK1          | LOC100506245   |
| ADRBK2         | GBA2           | SNORD35A       |
| ADRA2C         | TOP1           | XLOC_006513    |
| KCNQ1DN        | RBBP5          | XLOC_12_010330 |
| XLOC_000922    | LOC650368      | OAS1           |
| ZNF516         | SPANXB2        | YBX2           |
| PSORS1C2       | S100P          | KCNK1          |
| PGAP1          | ZNF75A         | TMEM189        |
| SPDYE5         | ZNF3           | KLC2           |
| KIAA0247       | C19orf59       | COL11A2        |
| LOC100288092   | HIVEP2         | TMEM231        |
| RXFP4          | ANKRD27        | MIDN           |
| CDC42EP2       | GPR116         | CNTNAP1        |
| XLOC_12_011265 | BCR            | TBPL1          |
| LPCAT3         | FOXD4          | TP53INP1       |
| OTUD3          | F11R           | MCTP2          |
| NFIL3          | AKT1S1         | SYT15          |
| NCKAP5L        | MRPL43         | RND3           |
| SAMD8          | PLEKHG6        | AGAP3          |
| EGLN3          | STK24          | TLR1           |



|                |                |                |
|----------------|----------------|----------------|
| XLOC_12_013931 | TTC28-AS1      | EFHC1          |
| CLCN4          | SNORD25        | TMEM139        |
| RTBDN          | CHMP1B         | SLC16A13       |
| LOC283710      | USP12          | FLRT3          |
| LOC100507165   | STX5           | LOC100652915   |
| TNKS1BP1       | STAMPB         | FAM161B        |
| TNFSF12        | CHTF18         | PIK3CD         |
| BTN2A3P        | SLC2A8         | XLOC_12_009571 |
| ERP27          | ATG16L2        | ADRBK2         |
| C3orf35        | LOC100505634   | LOC100509256   |
| ACHE           | UBXN7          | LOC100131831   |
| MXD1           | XLOC_010161    | TRIM3          |
| PDXDC2P        | HINFP          | SLC6A8         |
| TAF3           | LOC100653030   | TPMT           |
| PHLDB3         | PRKCZ          | HCLS1          |
| C1orf52        | ACBD7          | ULK4           |
| LOC338817      | XLOC_12_011901 | COQ10A         |
| CCDC64B        | IFNAR2         | ANKRD36B       |
| XLOC_003787    | MOK            | LOC100507395   |
| DNAJC28        | LRWD1          | XLOC_006588    |
| HERC1          | ARHGAP4        | BCL2L11        |
| TMEM184B       | CLDN12         | ETV3           |
| JPX            | FGFR1OP2       | CDH24          |
| WDR91          | PLXND1         | KCNK6          |
| NEAT1          | XLOC_013932    | RMRP           |
| EPB41L5        | NEDD4L         | DKFZp434J0226  |
| XLOC_007775    | ZCCHC14        | STK4           |
| XLOC_12_005714 | FBXL14         | XLOC_12_013485 |
| CHN2           | C1orf52        | CCNL1          |
| GDPD1          | TOM1L2         | C19orf77       |
| MYL9           | ITGA3          | MFSD2A         |
| LOC100509263   | PCBP4          | PTK2B          |
| XLOC_12_001064 | MAPKAPK2       | PPTC7          |
| IZUMO4         | DGKD           | ZNF584         |
| LOC729668      | FANCB          | ZNF3           |
| AMY1C          | WNT7A          | ATP7A          |
| PTAFR          | SLC12A9        | ANO3           |
| PPP1R12B       | CDH16          | ADRA2C         |
| OBSCN          | ATP2A1         | LOC100506157   |
| WTIP           | XLOC_008619    | LMTK2          |
| ABCA7          | PIP5K1B        | PDK4           |
| FGFR3          | FLJ35024       | SAMD8          |
| MARCH9         | FKBP5          | HRASLS2        |
| MORN3          | XLOC_004122    | CRAT           |
| FKBP7          | TESK1          | Q6NT14         |
| CSF3           | SEC14L2        | LOC284581      |
| NPAS1          | CAB39          | C12orf51       |
| OSBPL7         | BAHD1          | ZNF251         |

GGCX  
PLIN4  
RHOBTB3  
OVGP1  
MLF1  
MAP6D1  
GJB4  
LOC100505904  
LOC100289092  
TTC21A  
ARHGAP29  
XLOC\_12\_000010  
ACOXL  
LSS  
LOC286071  
KLHL7  
TMEM190  
LOC100131820  
HLF  
PGPEP1  
XLOC\_12\_007528  
CHTF18  
XLOC\_012139  
GALK1  
SLC6A6  
SNX22  
KISS1  
CCDC88B  
GMCL1  
LOC645638  
KIAA0319  
ZNF284  
TBPL1  
MAFB  
PMM1  
LOC286272  
FLRT3  
C19orf28  
XLOC\_011016  
VAT1  
XLOC\_009006  
SBF1  
LOC100289388  
MYO15B  
N4BP3  
MIA2  
KLC2  
GRIN1

RNF183  
ZNF833P  
NANOS3  
STON2  
TBC1D10B  
GPR137B  
MANBA  
DNAH7  
SLC22A1  
NUDT17  
LRP6  
ANO6  
PLXNA2  
TMEM8B  
HS6ST1  
LRRC1  
C1orf228  
SLC22A5  
HAUS6  
SNORA52  
MYO7A  
UBR2  
XLOC\_009788  
AGSK1  
IL18BP  
PLEKHM1  
XLOC\_012754  
KLHL30  
SIK1  
C19orf26  
KCNC4  
PLAG1  
AHR  
PAQR8  
PRKACA  
ARL13B  
REN  
ARRB2  
VKORC1  
NAALADL1  
CD14  
PSAT1  
MAP6D1  
ZNF554  
GZF1  
ZFAND5  
TTC18  
PCSK5

ECE1  
CHP2  
PPL  
ZFPM1  
SLC16A10  
DNAJB1  
MEGF6  
MXD1  
PPARD  
SLC12A4  
TMEM104  
LAMB2  
JPX  
PRIC285  
TMEM229B  
XLOC\_005442  
SIRT7  
PDPK1  
OVOL1  
CEACAM18  
LOC100289079  
XLOC\_12\_004854  
EPHA2  
MGC16703  
FLCN  
SNX25  
DEFB1  
KATNB1  
SNORA64  
MAP7D1  
C15orf5  
SCXA  
RUNDC3A  
LOC100507580  
LY6G6C  
TLE3  
CBL  
XLOC\_12\_001134  
SNX27  
TESK1  
FLJ90757  
VTRNA2-1  
AOC2  
DENND4C  
PTPRVP  
UBE2Q2P3  
VWA1  
B3GNT4

|                |              |                |
|----------------|--------------|----------------|
| INSR           | SLC35E4      | C12orf70       |
| CEP76          | MOB2         | XLOC_013994    |
| SYCE2          | SERPINC1     | TIPARP         |
| CCND3          | DNAJC12      | LOC100131234   |
| LRRC8E         | NPC1L1       | PDE4C          |
| LOC100287728   | PTCD3        | OGFR           |
| PEX13          | LOC400499    | ANXA6          |
| ODF3B          | ABL2         | XLOC_010352    |
| SZT2           | FLJ43681     | CGN            |
| XLOC_12_007783 | XLOC_000350  | RBM38          |
| XLOC_002705    | DAB2         | RDH13          |
| CDK5           | PCSK7        | PRR5-ARHGAP8   |
| SYNE1          | EDA          | USP49          |
| CISH           | XLOC_011223  | XLOC_12_013293 |
| XLOC_014243    | TPRA1        | LOC554206      |
| XLOC_001230    | BTRC         | LCA5L          |
| BCL2L11        | STXBP4       | LOC440300      |
| FLNA           | SNORA65      | HCFC2          |
| XLOC_010190    | CYP2D6       | SLC6A6         |
| CCDC74B        | C1orf55      | MIA3           |
| CCNE1          | SGMS2        | IQSEC1         |
| LOC388210      | LOXL3        | HSPG2          |
| CYP4F35P       | C10orf137    | ANKRD36        |
| MXRA7          | AMBRA1       | LOC440900      |
| LOC553103      | TNFRSF13C    | KIAA0247       |
| GTPBP3         | DNAJC5       | LOC100506073   |
| MMP15          | BREA2        | TBC1D16        |
| XLOC_005228    | AZGP1P1      | GPC1           |
| MAST3          | TEX2         | TMEM184B       |
| OXTR           | LOC100505933 | PLCE1          |
| CDKN2B         | ART5         | LOC388210      |
| XLOC_12_013293 | RALGAPA2     | SERAC1         |
| SRRM3          | HES5         | XLOC_009681    |
| GPBAR1         | FAM108A1     | KRTAP5-4       |
| SLC22A23       | C4orf19      | BBS12          |
| XLOC_008679    | GLI4         | TBC1D24        |
| SNX30          | SDCBP2       | MAPKAPK2       |
| C3orf25        | LOC100506001 | WDR19          |
| VEGFA          | RLF          | ZFAND3         |
| LOC100131089   | ATP7A        | C17orf28       |
| FBXO3          | DYNC1H1      | ADAM10         |
| LOC100289090   | LOC100507309 | XLOC_12_005714 |
| XLOC_12_013001 | AAK1         | VPS18          |
| LOC100130171   | CD74         | XLOC_009191    |
| XLOC_013923    | CKB          | C3orf71        |
| DOK3           | DNAL1        | LOC100509263   |
| XLOC_12_013873 | ARHGAP29     | KHK            |
| MED26          | ARHGAP44     | FGD6           |

|                |              |                |
|----------------|--------------|----------------|
| PLK3           | ADRBK2       | SCARNA5        |
| XLOC_12_012415 | RAB26        | XLOC_001072    |
| SPIRE1         | STK32C       | EXOC3L1        |
| XLOC_000671    | XLOC_013072  | XLOC_005228    |
| PDPK1          | RNF181       | IGFL1          |
| CCL3           | SEMA6A       | DUSP7          |
| NUB1           | LOC100127886 | CEP72          |
| TTC18          | SLC6A8       | TSC22D4        |
| SPTBN5         | COL16A1      | XLOC_000527    |
| LOC100506245   | RAB33A       | SNORA68        |
| LOC100129399   | SBK1         | XLOC_12_007928 |
| PTHLH          | GTPBP2       | XLOC_008556    |
| FAM131A        | MAPK8        | LOC730101      |
| SYVN1          | MKL1         | DOCK6          |
| ART5           | XLOC_005810  | PEX13          |
| PIGH           | ATP2B4       | FAM131B        |
| TSEN54         | CRISPLD2     | DEPDC7         |
| CHAC1          | XLOC_009602  | PCNXL2         |
| H1FX           | LOC202025    | HSPA1A         |
| TPPP           | DEPDC7       | CRTC2          |
| AFMID          | LOC100506990 | LIX1L          |
| IFNAR2         | ZBTB5        | KLHL15         |
| IGSF3          | TIE1         | IL36G          |
| PLA2G7         | ZNF598       | CSF1R          |
| RELT           | LMF2         | RPS20          |
| LOC652990      | SH3BP2       | FAM131A        |
| IDI2-AS1       | RAPH1        | FBXL20         |
| XLOC_009681    | P4HA2        | KIF21B         |
| XLOC_006513    | ZMIZ1        | LOC642852      |
| MIR7-3HG       | STX1A        | FADS3          |
| CCDC157        | SPATA2L      | MARCH9         |
| TPTE2P3        | ADAM20       | NELF           |
| POU3F3         | ZDHHC8       | ARHGGEF26      |
| RAB43          | GPBAR1       | C15orf58       |
| TTLL13         | HSF2         | DGKZ           |
| ABL2           | WDR67        | FAM132B        |
| ATG4B          | CTSL2        | FAM66D         |
| SYTL4          | NUB1         | SSSCA1         |
| FCHSD1         | PCNXL2       | UGCG           |
| FADS3          | ACBD4        | GYLTL1B        |
| ATP2A1         | CYP1A2       | TSPAN9         |
| SBK1           | XLOC_006505  | TMEM81         |
| C6orf124       | DTX2         | XLOC_000595    |
| PBXIP1         | TTLL7        | FBRSL1         |
| SLC26A1        | SPATA6       | LOC100132057   |
| VILL           | ABCA2        | ZFAND2A        |
| AIM1L          | TPST2        | PRSS30P        |
| CYB5R1         | COL13A1      | XLOC_005185    |

|                |                |                |
|----------------|----------------|----------------|
| PYGM           | SPTBN5         | C5orf27        |
| FBXO33         | CPT1A          | SLC2A8         |
| TMEM136        | ATP6V0D1       | RALGDS         |
| XLOC_12_001138 | GGT3P          | SNORD74        |
| GRIN2D         | FBXL20         | SERTAD2        |
| XLOC_010591    | SMAP2          | ISG15          |
| PPM1K          | STK40          | SNORD89        |
| TMEM200B       | PAPLN          | STK11          |
| C2orf106       | RUNDC3B        | PML            |
| SELPLG         | SLC31A1        | MGC50722       |
| COL6A1         | MICAL3         | CCNL2          |
| ADAM20         | DLX4           | PDE5A          |
| LUZP1          | ATL1           | CDK18          |
| ARHGAP44       | SNHG1          | POTED          |
| TRIM6          | CDC14B         | TNIP1          |
| CIC            | SNORD84        | TRA2B          |
| PAFAH1B2       | TSPAN32        | XLOC_010244    |
| CCNL2          | SECISBP2L      | TTC21A         |
| TMEM104        | HLA-DMB        | XLOC_011618    |
| SNORD76        | ZDHHC14        | STARD3         |
| XLOC_000214    | USP20          | AHR            |
| PGP            | ZNF211         | SLC25A22       |
| CORO7          | LOC100506800   | ZNFX1          |
| ADAMTS10       | LPCAT3         | PCDH1          |
| TRAFD1         | LOC100287813   | BCAR4          |
| FAM118A        | NKD2           | SEMA4D         |
| XLOC_009147    | GLTPD1         | XLOC_12_004611 |
| SBF1P1         | C6orf124       | TBC1D9         |
| FAM171A2       | HSPG2          | C1orf52        |
| PDE9A          | XLOC_013950    | PER2           |
| ADAM10         | RPS6KA5        | APH1B          |
| GGT7           | FAM91A1        | KRT14          |
| TNNI3          | ZNF436         | DUOXA1         |
| ADORA2B        | XLOC_12_005179 | PPP1R9B        |
| SLC19A2        | XLOC_006335    | HIST2H4B       |
| TBC1D24        | PHLDB3         | C1orf195       |
| C16orf86       | TBC1D16        | ZNF516         |
| GPER           | LOC100129781   | MCOLN1         |
| XLOC_000194    | MGAT4A         | FLJ35390       |
| PPP2R3B-AS1    | ATP13A3        | CTH            |
| LOC100289187   | WNT4           | BAI1           |
| ANKRD54        | COX19          | SLC25A29       |
| VANGL2         | RNF41          | TSC2           |
| LOC554206      | DNAJB1         | XLOC_12_013001 |
| CSGALNACT2     | TMEM154        | SNX29          |
| C19orf77       | STIM1          | LOC646626      |
| PDHA1          | LOC643837      | DEDD2          |
| DENND4C        | XLOC_011563    | ND5            |

|                |              |                |
|----------------|--------------|----------------|
| TNXB           | MAP3K10      | ILF2           |
| DAB2           | GK           | PPM1K          |
| GRIN3B         | XLOC_011924  | XLOC_12_009316 |
| CCP110         | TM2D2        | DCUN1D2        |
| ATP8A1         | ULK4         | ULBP3          |
| TP53AIP1       | IL6ST        | YPEL5          |
| MYO10          | C13orf16     | AKT1S1         |
| RHPN1          | RAP1GAP      | RLTPR          |
| LOC146513      | MIDN         | KLHL30         |
| SPN            | NPIPL2       | SYT7           |
| NEXN-AS1       | SNORA59B     | SERPINA6       |
| SLC2A6         | RPL28        | DNAJC5         |
| FAM108B1       | EPS15L1      | LOC388152      |
| TSPAN13        | TUBAL3       | ZNF555         |
| COL20A1        | CLCN4        | SPATA13        |
| C17orf59       | NRSN2        | ANKRD54        |
| TP53INP1       | PPFIA1       | FGFR3          |
| PRKAB2         | KEL          | MAP3K3         |
| LMF2           | PPAP2A       | TNFRSF1B       |
| SLC9A3R1       | LOC554206    | EMP3           |
| CHRM4          | CRY2         | PPP1R12C       |
| NCF1           | LOC100129034 | GSTM4          |
| XLOC_12_015213 | XLOC_007776  | HSPA1B         |
| NDOR1          | TSPO2        | HDGFRP2        |
| CDA            | TMEM59L      | WDR37          |
| ACER2          | LOC440132    | SLC46A1        |
| PDE4C          | RHOBTB2      | AQP7           |
| LOC100652915   | SPTAN1       | LOC100130419   |
| WWC3           | ATP7B        | ARRB2          |
| GGTLC2         | DYNLT1       | ANKRD43        |
| CBFA2T2        | IPO9         | LCN15          |
| ZNF878         | GALK1        | STK17B         |
| BIVM           | ATG4A        | FOXO1          |
| SLC5A3         | RIMKLA       | SLC19A2        |
| ZNF3           | ACSL1        | C9orf89        |
| SLC22A2        | TNFRSF4      | CHD9           |
| RNASE4         | LOC729652    | EZR            |
| C17orf69       | C17orf28     | FAM108A1       |
| IL6ST          | LOC100506605 | HOTAIRM1       |
| XLOC_013950    | MYO10        | LOC100127886   |
| XLOC_014088    | FBXO3        | IGSF3          |
| XLOC_011025    | ENDOV        | MAP2K3         |
| TCEA3          | JARID2       | PPP2R3B-AS1    |
| PIKFYVE        | CCND3        | XLOC_009944    |
| ATP7B          | AFF4         | GPR3           |
| MZB1           | LOC100653017 | C5AR1          |
| MARK4          | PRKAB2       | SLC22A2        |
| LOC100130899   | MYO9B        | NMUR2          |

|              |                |              |
|--------------|----------------|--------------|
| OCR1         | FEM1C          | LTB4R        |
| EFHC1        | KLHL28         | MBNL2        |
| IFFO2        | CHD9           | IRF2BP1      |
| INPP5F       | USP49          | XLOC_008357  |
| ATG16L2      | CCNE1          | LOC100653017 |
| PAPLN        | TRIM10         | AASS         |
| ABHD6        | ARMC2          | KCNAB2       |
| C9orf96      | HN1            | LINC00260    |
| RHPN2        | KCTD5          | ABL2         |
| LOC100132057 | MATN3          | SRPK3        |
| ZFYVE1       | TAGLN          | FCHSD1       |
| FAM89B       | ANKRD13C       | IRF6         |
| XLOC_002133  | EZR            | BRI3         |
| LOC100268168 | TBC1D2B        | LRWD1        |
| LMF1         | SNORD99        | ATP2A1       |
| FBXO31       | ENPP4          | LOC100507347 |
| E2F2         | CLDN7          | LOC100507918 |
| PRSS8        | PKD1           | MBOAT7       |
| EML6         | DCUN1D2        | PHACTR3      |
| ANO8         | KIAA1432       | RHPN2        |
| LOC100507445 | LOC401561      | FRMD8        |
| MAPK15       | SGK1           | CDHR5        |
| GOLGA6L9     | BTN2A3P        | STX1A        |
| XLOC_002113  | NEK1           | MYT1         |
| XLOC_007262  | LOC100505633   | RAB37        |
| XLOC_003872  | GSTT2          | LOC100507165 |
| ZBTB48       | PALLD          | ITPK1-AS1    |
| LOC100505669 | VPS13C         | PPM1B        |
| LOC100507373 | SDHAP1         | ATG4A        |
| LOC100506859 | MOCS1          | PDXDC2P      |
| XLOC_005341  | TMEM185A       | ITGB7        |
| C5orf45      | THBS1          | RECQL4       |
| CXXC1        | C12orf44       | KATNAL1      |
| HOXA1        | ZNF608         | ANO9         |
| PDE5A        | RNFT2          | SLC6A10P     |
| WNT7B        | XLOC_12_010831 | ANKRD23      |
| RSPH3        | CCDC85C        | ZNF433       |
| C10orf116    | MR1            | FLNC         |
| CTSF         | LOC100505882   | C17orf69     |
| Q6P4E4       | GNA12          | SPN          |
| KCNJ18       | UBXN11         | ZNF519       |
| C17orf56     | PTPRVP         | MYPOP        |
| XLOC_003881  | ZNF780B        | PPAP2A       |
| LOC100130015 | HIP1R          | RAB3B        |
| IDS          | LOC729041      | MYO7A        |
| SIRT2        | XLOC_12_010330 | XLOC_005900  |
| LOC100128869 | HOXB13         | FXVD7        |
| XLOC_004165  | LOC643650      | KIAA1432     |



|              |                |                |
|--------------|----------------|----------------|
| ZNF608       | CACNA1I        | TMEM170B       |
| PTCH1        | CDK18          | SNX30          |
| GPR162       | LOC100132240   | CEP44          |
| FAM69A       | GTF2B          | CDHR3          |
| SLC41A1      | GSTT2B         | C14orf45       |
| KCNC4        | C1R            | LOC283588      |
| PLCB2        | PFKP           | CCDC87         |
| ATP6V0A1     | FANK1          | MOK            |
| ENPP1        | GAN            | GCNT1          |
| DNALI1       | IL28RA         | CLDN11         |
| PHYHIP       | PBXIP1         | ZNF878         |
| LOC100289580 | IFFO2          | LOC100130876   |
| SH2D1B       | XLOC_003738    | XLOC_001023    |
| LOC100128477 | IFI30          | SEC31B         |
| TBX3         | CCDC64B        | RN7SK          |
| NOS1AP       | TULP3          | NINJ1          |
| PQLC1        | MIA3           | LOC100271831   |
| ZNF709       | UBXN10         | RHOD           |
| AVIL         | NOTCH1         | XLOC_011480    |
| LOC100505933 | AFMID          | C16orf93       |
| SCARNA20     | ACSL3          | KDELC1         |
| ZDHHC8       | XLOC_012688    | PAPLN          |
| CEP68        | XLOC_000490    | SLC41A1        |
| ECI2         | TMEM92         | DTX2           |
| LOC440910    | C16orf80       | NRARP          |
| ANKRD27      | STXBP1         | PIK3R3         |
| ATP8B2       | SIRPG          | XLOC_012162    |
| LOC100507347 | DYNC2H1        | SPAG9          |
| FAM160A1     | VWF            | PDLIM5         |
| YBX2         | RHCG           | XLOC_012053    |
| LOC497257    | ZNF778         | XLOC_001507    |
| DYNLT1       | PDE4C          | JAG1           |
| TMEM132A     | XLOC_12_000010 | PIAS1          |
| TNNC2        | C1orf138       | FAM91A1        |
| TMEM98       | LOC100507594   | CDC14A         |
| LOC100134259 | LRRC16B        | RNF114         |
| LOC389199    | XLOC_002035    | AGPAT4         |
| C17orf28     | FAM160A1       | XLOC_12_010511 |
| MYLK2        | PLEKHA4        | RDX            |
| ASRGL1       | XLOC_003386    | FAM107B        |
| LOC283588    | HPN            | GSTT2          |
| CGRRF1       | LEPRE1         | GOLGA8IP       |
| GLIS3        | RLTPR          | PRKCA          |
| TMEM81       | ACVR1C         | ZFAND5         |
| DPY19L2P3    | FLJ37644       | TAGLN          |
| C15orf60     | PRRG1          | PLEKHG6        |
| ELF3         | KHDRBS3        | SPIRE1         |
| PNPLA7       | PRKAG2         | XLOC_011766    |

|                |                |                |
|----------------|----------------|----------------|
| GRK5           | F10            | LRRC39         |
| XLOC_12_014098 | XLOC_014243    | CCNE1          |
| LOC388152      | SNAPC2         | GPT            |
| XLOC_12_010831 | PDXDC2P        | INSR           |
| WDR19          | LINC00341      | DNMT3B         |
| PPP1R15B       | PDGFB          | PLEKHG2        |
| MAPK8IP3       | sept-12        | WDR91          |
| LOC100507395   | ENPP2          | ZFYVE1         |
| GAS2L1         | FMNL2          | PDE6D          |
| XLOC_12_010330 | LUZP1          | MARCH3         |
| XLOC_012281    | NOSIP          | SLC25A27       |
| SLC9A6         | GALNT6         | MAPKBP1        |
| NANOS3         | XLOC_12_006745 | XLOC_003349    |
| FRY-AS1        | SNX25          | ZCCHC14        |
| YPEL5          | SLC2A1         | SNAPC2         |
| LOC100499221   | IQSEC1         | TRPM5          |
| TPMT           | XLOC_009181    | SBNO1          |
| LOC100506866   | GPATCH1        | SNX22          |
| SSC5D          | KIF16B         | TMED6          |
| CYFIP2         | PECAM1         | RAB44          |
| MYBPC2         | ZNF709         | LOC100505669   |
| KIF16B         | ISG15          | SEC14L1        |
| IQSEC1         | XLOC_012162    | XLOC_12_007834 |
| CTSL2          | METRNL         | ACER2          |
| PLEKHM1        | NPAS2          | CRABP2         |
| LOC728061      | OCEL1          | LOC100505933   |
| LOC392288      | XLOC_12_008151 | sept-12        |
| PNPLA2         | XLOC_013301    | UBR4           |
| VNN2           | SLC22A23       | MED26          |
| ULK4           | PRR5-ARHGAP8   | LRRC16B        |
| KIAA0930       | PMPCA          | WWTR1          |
| POR            | AFAP1-AS1      | XLOC_004122    |
| LRRC39         | HOXC10         | MPV17L2        |
| XLOC_004366    | PGPEP1         | XLOC_12_008203 |
| C16orf87       | XLOC_003482    | CAPN12         |
| NOTCH2NL       | CBL            | C17orf51       |
| ACADSB         | CERS5          | SHOX2          |
| TBC1D2         | CLEC16A        | ZNF821         |
| XLOC_12_015127 | PC             | ZBTB80S        |
| PTPRVP         | C16orf87       | CIC            |
| STK31          | ICOSLG         | NFIL3          |
| PDE4DIP        | PDE9A          | SNORD22        |
| ANPEP          | CDA            | LOC100128563   |
| ZNF251         | TMEM145        | NR4A2          |
| CFP            | TSEN54         | GRIN3B         |
| SYS1           | STK4           | TRIP10         |
| FLJ26086       | FRRS1          | C19orf28       |
| OPN3           | CLCN5          | EID2B          |

|                |                |              |
|----------------|----------------|--------------|
| LOC100506890   | LYG1           | CYP39A1      |
| KLHL15         | XLOC_013445    | GGT7         |
| ANGPTL2        | QSOX1          | PLIN2        |
| MKNK2          | SYT15          | NPAS1        |
| ANKRD13B       | CYP39A1        | ELL          |
| XLOC_004430    | HLA-F          | LOC100128001 |
| METRNL         | PPARGC1B       | ZNF211       |
| LOC100507278   | GNA11          | HPSE         |
| ANKRD23        | LOC729668      | SERPINA5     |
| SCG5           | CNIH2          | SNORD31      |
| SLC23A2        | NT5DC3         | TTLL5        |
| PORCN          | OTUB2          | PP12719      |
| LINC00482      | RAB9A          | UBE2Q2P1     |
| XLOC_010286    | POFUT2         | LOC100509638 |
| ATG4A          | CRELD1         | CHST7        |
| ADAM8          | LRRN4CL        | C7orf54      |
| XLOC_011256    | MAD1L1         | PDE4DIP      |
| DKFZp451A211   | DGKZ           | RNGTT        |
| ARHGEF26       | WDR19          | C5orf56      |
| FLJ42022       | EXOC8          | ADORA2B      |
| TNK2           | TNFSF12        | NPHP3        |
| MUC12          | C1QTNF5        | POLR2F       |
| SERAC1         | SLC2A2         | SNORA10      |
| BMP8B          | LOC642852      | LOC100506553 |
| HIST1H2AC      | AK1            | AHRR         |
| RAB9A          | SCARNA20       | KCNJ13       |
| KCNK5          | FAM102B        | XLOC_013942  |
| CABYR          | AQP7P1         | CAMTA1       |
| IGFALS         | CD6            | XLOC_011448  |
| CD52           | SEMA4F         | LOC92659     |
| XLOC_009576    | AFF1           | ZNF778       |
| PPIL6          | GPT2           | CTSL2        |
| C17orf76-AS1   | STRN           | LOC100130899 |
| LOC100653030   | P2RY1          | PBXIP1       |
| LOC100506605   | MAFF           | XLOC_009576  |
| ADM            | NRARP          | SMAD7        |
| ERO1LB         | P39194         | HIP1R        |
| TSGA10         | ZNF251         | LOC729668    |
| LPAR5          | TMEM104        | LOC100294362 |
| SCD5           | G0S2           | SNORA65      |
| WNT10B         | TPMT           | DAAM1        |
| LOC100616668   | SLC25A36       | RPL28        |
| MAPK8IP1       | XLOC_12_000399 | GPR137C      |
| XLOC_12_006944 | PPP1R18        | KCTD11       |
| TMEM170B       | SNORD76        | ZNF174       |
| C2CD4C         | SAG            | C14orf43     |
| NEIL1          | PAFAH1B2       | ZNF598       |
| FAM69B         | LOC100128198   | GSTT2B       |

|                |                |                |
|----------------|----------------|----------------|
| MAPK11         | TGFBR3         | VILL           |
| TSC22D2        | LCN15          | SPDYE2         |
| DDR2           | SHB            | C10orf47       |
| SGCA           | HLA-DOB        | LOC729159      |
| IZUMO2         | XLOC_009261    | RAB30          |
| LOC100128001   | LCA5L          | CCL27          |
| CEP19          | SERPINA3       | C20orf106      |
| PFKFB2         | PTCH1          | Q6P4E4         |
| XLOC_012592    | EPHB6          | SNORD84        |
| TTC28-AS1      | CCDC112        | XLOC_001441    |
| C9orf24        | RSU1           | GGN            |
| LOC728802      | LOC100130899   | FBXO3          |
| DNAJB13        | PGAP1          | XLOC_12_005020 |
| FLJ42392       | PDE6D          | PLEKHA4        |
| CTH            | SNORA44        | XLOC_12_010724 |
| ULK1           | ZNF79          | LOC100190939   |
| PLAG1          | WWTR1          | CNTD2          |
| DAGLB          | NEBL           | RAB26          |
| MAP4K2         | PMM1           | XLOC_013445    |
| XLOC_009724    | RUNDC3A        | CKB            |
| XLOC_12_009050 | PCYT2          | SELPLG         |
| CHST7          | CDX2           | KLHL28         |
| HEBP1          | TMEM189        | LOC440905      |
| UBAP1L         | SPECC1         | CNNM2          |
| HHEX           | SNORA64        | LOC100127885   |
| LOC100499467   | C17orf51       | PHLPP2         |
| NDRG1          | SYNGAP1        | C9orf140       |
| XLOC_007504    | XLOC_12_011204 | MMD            |
| LHX1           | XLOC_12_005076 | GAK            |
| HPN            | ARL6           | C17orf109      |
| PLIN3          | SLC6A10P       | XLOC_011837    |
| IL17RA         | TLE1           | LOC390940      |
| STAMBP         | CNP            | COL16A1        |
| PTGS1          | GOLGA2         | ENPP5          |
| DIRAS3         | MBD5           | PRRG2          |
| LOC100128670   | SLC1A5         | CCDC19         |
| NAB2           | XLOC_12_007802 | SEC16A         |
| ZNF556         | GAK            | XLOC_003738    |
| LOC100130357   | MAP2K3         | NAMPT          |
| XLOC_12_008151 | ZNF217         | LOC100268168   |
| CKM            | LOC283174      | XLOC_012754    |
| TANC2          | XLOC_000670    | GTF2B          |
| ACSS2          | ABLIM1         | XLOC_12_011901 |
| EMP1           | EFCAB3         | MUC12          |
| LOC100129924   | UNC5A          | CCDC82         |
| XLOC_12_010511 | SPSB3          | PPP1R32        |
| TSPAN9         | XLOC_013364    | RAPGEFL1       |
| PPM1N          | PGBD1          | SRGAP2P2       |

|                |                |              |
|----------------|----------------|--------------|
| LOC100131829   | SPAG9          | EXD3         |
| FAM161B        | CLCN2          | KIAA1671     |
| C1orf228       | MAML2          | XLOC_005361  |
| XLOC_011104    | XLOC_003881    | CCDC85C      |
| RPL32P3        | ANKRD13B       | PLEKHO1      |
| LOC100132077   | TBC1D8         | SNORD83B     |
| CEP72          | LEPREL2        | SLC25A35     |
| MAP1LC3B       | WDR91          | NDRG1        |
| SNCAIP         | MORN3          | SMTN         |
| HCLS1          | MYL9           | LOC100291105 |
| MPV17L2        | PDPK1          | LENEP        |
| RFPL4A         | DNAJC16        | TMEM190      |
| MCOLN1         | TPPP           | SLC12A7      |
| SPOCK2         | SNORD31        | AMY1C        |
| LOC642852      | C20orf54       | FAM160A1     |
| C16orf55       | MXD1           | XLOC_002921  |
| C17orf109      | JMJD7-PLA2G4B  | MYO1E        |
| MAP2           | XLOC_12_013001 | AMH          |
| KRT80          | RHPN1          | CCDC157      |
| C9orf72        | ZNF584         | PPARGC1B     |
| LOC100507487   | OTUD3          | TRIM4        |
| LCK            | NOTCH2         | RGS9BP       |
| ACBD4          | RTP3           | XLOC_009498  |
| XLOC_12_008259 | PCSK4          | SLC28A2      |
| POU2F2         | MED26          | ZNF385A      |
| KLRG1          | LOC100506183   | LOC652990    |
| XLOC_001048    | BCL2L11        | C1S          |
| MBOAT7         | CBX6           | MOB2         |
| XLOC_005748    | RAB7L1         | Q93YZ4       |
| CREB3L2        | LOC100128019   | AGSK1        |
| C20orf96       | TTLL10         | LOC100128477 |
| LOC284108      | TBC1D10A       | XLOC_011025  |
| LACTB          | TSPAN5         | HS6ST1       |
| XLOC_003734    | FAM69B         | LAMA5        |
| RPUSD1         | PDE4DIP        | GAPVD1       |
| KIAA1549       | IL10RB         | PAOX         |
| NGDN           | NME7           | C1orf201     |
| REEP6          | SEL1L          | ZDHHC11      |
| EFCAB3         | SLC19A2        | PDK2         |
| STX1A          | PTPRE          | SEMA6C       |
| C16orf93       | SNAPC4         | HDAC10       |
| GOLGA6L6       | HMHA1          | C1orf124     |
| LOC100129973   | DBN1           | FZD5         |
| ALAS1          | CDHR5          | ZNF79        |
| KSR2           | FGF11          | PLCG2        |
| PIDD           | SLC25A35       | AFF1         |
| TRIM52         | RUNX1          | PFKFB2       |
| IL28RA         | CSF2           | LUZP1        |

|                |                |                |
|----------------|----------------|----------------|
| KSR1           | SCARA3         | XLOC_000546    |
| NFKBIA         | SBF1           | FLJ22763       |
| DEPDC7         | LOC100190939   | RNU1-5         |
| B3GNT4         | LOC100507233   | CENPT          |
| KCNAB2         | BCAM           | TOB1           |
| AKNA           | RHOD           | DBNDD1         |
| CDHR3          | ZNF654         | GNA11          |
| TMEM120B       | PLEC           | C4orf38        |
| ZNF503-AS1     | C5orf27        | LOC100132167   |
| PLSCR2         | RPPH1          | LOC100652730   |
| TTC16          | KIF25          | GGT3P          |
| CMTM1          | PPP1R9B        | FBXO48         |
| IGLL1          | ANKRD54        | PHLDA3         |
| C1orf201       | SSC5D          | TTBK2          |
| NAT14          | KIRREL3        | PTPN13         |
| GIPR           | YIF1B          | IFFO2          |
| UTP23          | FLJ32224       | PCYOX1L        |
| OCEL1          | PAOX           | RSPH3          |
| DNAL1          | DNASE1L2       | MYL9           |
| ZNF324         | TMEM184B       | DBN1           |
| SLC30A2        | KANK2          | CNOT4          |
| CLMN           | LOC729732      | XLOC_012586    |
| GFOD1          | GYG2           | LLGL2          |
| GPR153         | LOC100132057   | XLOC_010881    |
| CLIC3          | COQ10A         | FBXO43         |
| SAT2           | SLC25A44       | PRDM2          |
| LOC100506633   | TSNAXIP1       | RAB9A          |
| C16orf70       | ZNF516         | HOXB13         |
| XLOC_12_004640 | C9orf89        | ZNF697         |
| XCL1           | XLOC_12_008221 | ACOXL          |
| HBEGF          | PIK3CD         | SPTB           |
| GSTM1          | CLIP3          | XLOC_006505    |
| MGC50722       | XLOC_011765    | ZDHHC8         |
| XLOC_006505    | SNORA53        | XLOC_008995    |
| FGF11          | RORC           | LOC100289187   |
| RTTN           | ZFAND2A        | XLOC_12_006152 |
| UBE2Q2P2       | PADI2          | C19orf26       |
| FBXL20         | LOC100127885   | SBF1P1         |
| CDX1           | SEC31B         | PDLIM7         |
| FARP2          | IQCH           | XLOC_013950    |
| AZI1           | GNAI2          | PGRMC2         |
| NAV1           | COL20A1        | LOC100128071   |
| DBNDD1         | CAMK1D         | LOC497257      |
| LOC91450       | CHRNA10        | FAHD1          |
| DNMT3B         | CYP2B6         | JUNB           |
| RUNDC3A        | NXF1           | HVCN1          |
| XLOC_12_011901 | LOC100128477   | VTRNA1-3       |
| XLOC_001576    | KLC2           | XLOC_003872    |

|              |                |                |
|--------------|----------------|----------------|
| ZNF177       | NAMPT          | C17orf59       |
| PURG         | REC8           | INPP5F         |
| RAB24        | FGFR3          | ND2            |
| SPON1        | EPHA2          | FNBP1          |
| TTBK2        | ELL2           | PGPEP1         |
| DNMT3L       | ZNF821         | XLOC_009016    |
| FOXD4        | ECI2           | ADARB1         |
| PPFIA3       | XLOC_002356    | TSEN54         |
| Q93YZ4       | ZBTB47         | TTC25          |
| LCN15        | LOC440300      | PVR            |
| ASB6         | LRIG1          | MYH3           |
| ANO3         | LOC100129363   | KIF25          |
| CYP2B6       | C8orf46        | LOC100652777   |
| ROM1         | IZUMO4         | CABP1          |
| XLOC_011918  | OSTM1          | SNORD12C       |
| XLOC_012754  | HERC1          | XLOC_12_006021 |
| LOC100505832 | ZFPM1          | SLC9A3R1       |
| TTC25        | S100A1         | XLOC_003734    |
| XLOC_000388  | GRIN3B         | SCARNA4        |
| ELMOD3       | KCNAB2         | SEC14L4        |
| GGTLC1       | XLOC_12_003897 | OVGP1          |
| TMEM139      | MYPOP          | WDR83          |
| PRKCA        | CCDC157        | XLOC_12_000706 |
| FAM108A1     | XLOC_003235    | BTN2A3P        |
| CCDC82       | LOC100128402   | C17orf56       |
| XLOC_000527  | HK2            | CHTF18         |
| MMD          | FAM107B        | LOC728431      |
| RASGEF1B     | PDIA2          | FYN            |
| APLP1        | EIF4A3         | XLOC_12_007644 |
| TSL          | LEAP2          | POR            |
| SPSB1        | FAM132B        | BACE1          |
| GPRIN1       | MAPK8IP2       | FBXO36         |
| C15orf62     | GTPBP3         | GAST           |
| EXOC8        | MBNL2          | ACCN3          |
| FAM91A1      | RAB11FIP3      | DAGLB          |
| SERPINA5     | XLOC_002069    | ITLN2          |
| PLIN2        | WDR26          | PSPN           |
| GAK          | XLOC_12_011798 | CCP110         |
| FUCA1        | ROPN1L         | UPP1           |
| LOC440905    | ARFGAP1        | TUBGCP6        |
| ESAM         | FRY            | XLOC_006319    |
| LRRC31       | ACER2          | XLOC_12_013873 |
| SNORA61      | DDX26B         | LOC100130581   |
| TM2D2        | C11orf45       | CLMN           |
| LOC100128857 | CX3CL1         | LOC100505930   |
| ACBD7        | LOC100507800   | XLOC_12_015127 |
| CHRD         | CD81           | ADCY10         |
| SCARNA8      | EPB41L5        | RPS2           |



|                |                |                |
|----------------|----------------|----------------|
| KIAA0913       | FAM18B2-CDRT4  | SLC26A1        |
| XLOC_12_006152 | KIAA0226       | TBC1D2         |
| RELL2          | WNT11          | SNORD76        |
| MAPRE2         | INSR           | ACBD4          |
| CCDC85C        | TRIM41         | RNU2-2         |
| ATP8B3         | PDZD7          | MXRA7          |
| TMEM145        | DKFZp434J0226  | VNN2           |
| XLOC_12_015209 | TMEM190        | IQCD           |
| TUBB2A         | DISP1          | XLOC_12_014098 |
| LOC100506688   | CALCOCO1       | XLOC_000388    |
| RPL3L          | RNF157         | ANKRD42        |
| SLC9A3         | KIAA1539       | RELL2          |
| SMAD5-AS1      | CDX1           | LOC100128670   |
| RALGPS1        | LOC100506219   | TBC1D10B       |
| HIP1R          | XLOC_12_003674 | PIM2           |
| KIAA0895       | XLOC_001023    | NFAM1          |
| GGN            | SSBP3          | ULK1           |
| FZD5           | ANGPTL2        | XLOC_12_002204 |
| XLOC_008357    | ZNF433         | GRHL1          |
| ANKRD43        | CA4            | EGR1           |
| LOC100130547   | XLOC_010500    | DIO3           |
| XYLT1          | XLOC_012515    | LOC100505760   |
| BBOX1          | RNF208         | WNT4           |
| LOC100132167   | KCTD13         | SNORA17        |
| P2RY1          | FLJ30064       | PNPLA7         |
| DOC2GP         | TBC1D2         | CYFIP2         |
| TLR1           | POLR2J4        | FLJ16779       |
| CES1           | INPP4A         | LOC100653030   |
| C9orf139       | FAM118A        | BCAM           |
| TMEM189        | LCK            | FARP2          |
| RNF114         | C3orf35        | GOLGA6L10      |
| FAM90A1        | PLCXD2         | TAOK2          |
| RAPGEFL1       | LOC100505668   | XLOC_12_009883 |
| CLDN6          | LOC100506890   | SCPEP1         |
| GPR116         | CDC42EP3       | TMEM145        |
| ZNF707         | RHOBTB3        | SNORA57        |
| XLOC_009183    | C1orf9         | LOC100131820   |
| LOC100505683   | SIX1           | KCNC4          |
| KCNC3          | XLOC_005968    | TMEM59L        |
| XLOC_12_011043 | NEAT1          | SPACA4         |
| TEKT5          | ASPG           | PCSK5          |
| FBXO32         | CEP170         | SPSB3          |
| KHK            | ZNF474         | UBXN11         |
| RAB37          | XLOC_002793    | RAET1K         |
| LOC100507651   | MPV17L2        | FLNA           |
| XLOC_004229    | TNFRSF21       | PPFIA3         |
| POLR2F         | ZNF555         | C6orf124       |
| LEPRE1         | PPTC7          | JAKMIP3        |

|                |                |                |
|----------------|----------------|----------------|
| EXD3           | NT5DC4         | AFMID          |
| ERV18-1        | C2CD4C         | BAK1           |
| PGRMC2         | FLCN           | XLOC_003787    |
| VWA3A          | SCML1          | SIRT2          |
| SLC46A1        | DEF6           | CBFA2T2        |
| ATP2B4         | ACOT7          | TTLL10         |
| LGSN           | GAS2L1         | HLA-DMB        |
| XLOC_011480    | RDH13          | LMF2           |
| LIPE           | SRRM5          | NEURL1B        |
| KATNAL1        | STK17A         | UBAP1L         |
| FAM126A        | SLCO4A1        | MAN1A1         |
| SLC4A9         | XLOC_12_013931 | ALAD           |
| MFSD2A         | XLOC_011766    | SNORD25        |
| PLCL1          | LOC100131702   | ENGASE         |
| C6orf132       | OR4C46         | ATF3           |
| MERTK          | SPDYE2         | PMEPA1         |
| CCDC126        | XLOC_013866    | GPR157         |
| JARID2         | SPATA13        | ZNF385C        |
| FYN            | GOLGA6L10      | XLOC_12_007097 |
| MRGPRF         | ACSS2          | LOC100132741   |
| SPAG9          | XLOC_12_013293 | CLCNKA         |
| HCFC2          | IRAK1BP1       | NPHP1          |
| SH3PXD2A       | ABLIM3         | KCNK5          |
| MYT1           | C16orf93       | P39194         |
| COLQ           | TCIRG1         | C3orf45        |
| ACCN3          | LOC100652769   | TTLL13         |
| SAMD4A         | FZD2           | WWC3           |
| UBE2H          | SPTBN1         | SMOX           |
| MOK            | XLOC_005341    | MLLT11         |
| AEBP1          | SNRNP48        | XLOC_009181    |
| AGPAT4         | CCP110         | IGLL1          |
| GSTM4          | TBX3           | CHRD           |
| CD3G           | CGRRF1         | USH1G          |
| XLOC_005968    | KIAA0247       | TMEM92         |
| HPX            | STK17B         | MAPK8IP1       |
| LOC100505551   | ITLN2          | LBH            |
| BMP2           | XLOC_12_011043 | ACBD7          |
| NXF1           | MIB2           | MIR22HG        |
| PLXNA4         | XLOC_12_007783 | PRODH          |
| NKIRAS1        | ABCA7          | FLJ37644       |
| SLC25A44       | XLOC_001262    | BREA2          |
| CERKL          | AGPAT2         | PAG1           |
| XLOC_013981    | FADS3          | XLOC_004834    |
| MLLT11         | GPR162         | NGDN           |
| ZNF221         | C4orf22        | SBF1           |
| XLOC_12_014421 | C21orf88       | LRRC8E         |
| LIX1L          | XLOC_014212    | MAST3          |
| XLOC_011758    | PARM1          | VAT1           |

|                |                |                |
|----------------|----------------|----------------|
| SNRNP48        | C1orf135       | KCNJ10         |
| SYNGR1         | MPRIP          | SLC30A2        |
| CYHR1          | EHD4           | DNAH6          |
| ZNF385C        | MAPK11         | CBX6           |
| ERVW-1         | HERPUD1        | HN1            |
| SYT7           | FAM171A2       | SLC25A30       |
| ITPRIP         | KRTAP5-8       | SHB            |
| TRIM4          | PQLC1          | XLOC_014237    |
| FAM59B         | XLOC_013506    | TLE4           |
| MOCS1          | SNX18          | LIN7B          |
| SLC9A5         | CD55           | KIAA1467       |
| KIF5A          | KIAA0930       | GRIN2C         |
| SLC5A11        | GRAMD2         | PIKFYVE        |
| SEC61A2        | CDC14C         | ZNF890P        |
| AASS           | RTTN           | PAFAH1B2       |
| FGF8           | F3             | XLOC_12_012415 |
| XLOC_12_004317 | CT45A1         | ATP8B3         |
| EFNA4          | LOC390940      | SNORD75        |
| MIB2           | GRIN2C         | MEGF9          |
| C11orf94       | TTYH3          | SERHL2         |
| PHF1           | XLOC_12_012871 | SYCE2          |
| ROPN1L         | MKNK2          | ZNRD1-AS1      |
| CCDC116        | LOC100506428   | P2RY1          |
| LOC283070      | RALGPS1        | MAP1LC3B       |
| CSRNP1         | CBFA2T2        | MPZL3          |
| LOC100128198   | FGFBP1         | CD274          |
| TCEAL5         | ABCC1          | DRAM1          |
| SHF            | LOC100505725   | XLOC_013958    |
| XLOC_001428    | C9orf116       | PI4KAP2        |
| XLOC_011563    | ARSK           | XLOC_011430    |
| HOXB13         | ADIPOR2        | TCFL5          |
| ARHGAP39       | LOC440792      | AK1            |
| XLOC_12_003897 | PTPRCAP        | LOC100130285   |
| COL8A2         | XLOC_005273    | C16orf55       |
| CBX6           | UBAP1L         | XLOC_12_013853 |
| HMOX1          | CIDECF         | ARHGAP29       |
| LOC152286      | PROC           | PLCXD2         |
| KLHL5          | CEP72          | MAFF           |
| NR6A1          | MICAL2         | AMBRA1         |
| XLOC_12_005695 | KCNC3          | PGP            |
| XLOC_12_014820 | HPCAL1         | PPP1R13B       |
| CSF1R          | FAHD2A         | XLOC_009457    |
| SAT1           | LOC440910      | HTT-AS1        |
| KLK8           | SLC12A4        | ZFYVE28        |
| WFDC1          | MYO15B         | RUNDC3B        |
| LOC340508      | XLOC_12_003974 | C2             |
| DDX26B         | LOC100505988   | psiTPTE22      |
| XLOC_12_003295 | TRIM62         | LYG1           |

|                |                |                |
|----------------|----------------|----------------|
| ALDOC          | C17orf76       | TTLL11         |
| PLA2G10        | LOC202181      | CXXC1          |
| PIP5K1C        | PAGE2          | EXOC8          |
| AHR            | JUN            | XLOC_000055    |
| TAS1R3         | ENGASE         | PLAG1          |
| KLHL26         | FAM69A         | PRSS8          |
| SCARA3         | REEP6          | SEC61A2        |
| TBX19          | TAOK2          | LINC00483      |
| LYG1           | ILF2           | TRAFD1         |
| FASLG          | MAP4K2         | XLOC_12_007427 |
| SLC39A8        | BCL6           | XLOC_012192    |
| NFKBIE         | XLOC_000048    | LOC100131551   |
| GRM1           | MAN1B1         | RNF157         |
| C1QL1          | LOC100268168   | RAPH1          |
| LEKR1          | SHD            | MMP15          |
| KRTAP5-4       | SNX22          | ERN1           |
| ACAP3          | PKDREJ         | C9orf24        |
| KLKP1          | SLC27A1        | CCDC75         |
| C3P1           | EID3           | NKPD1          |
| STXBP4         | KLK8           | SNORD100       |
| ALS2CR12       | SEPX1          | LOC100506913   |
| HS6ST1         | ACSF2          | XLOC_003729    |
| DNAJB5         | KIAA1984       | TBX19          |
| LOC283887      | EGR1           | LCK            |
| METRN          | RPS6KL1        | RAB7L1         |
| XLOC_12_009883 | FAM132A        | F3             |
| ZNF211         | DNAJC6         | LDLRAD1        |
| BBS12          | ACOXL          | DUSP8          |
| LOC100507401   | WFS1           | C9orf116       |
| HIC2           | WNT7B          | NCKAP5L        |
| PRODH          | LRRC17         | GALK1          |
| LOC100132474   | XLOC_002741    | RPL3L          |
| SLC16A3        | XLOC_12_005020 | XLOC_008223    |
| NEK10          | XLOC_002987    | CCDC17         |
| ACSF2          | TMEM229A       | NR6A1          |
| TMEM59L        | LOC100507580   | ATMIN          |
| ZNF385A        | SUN1           | MECOM          |
| C10orf54       | ANPEP          | LOC728802      |
| XLOC_005991    | OAS1           | FGF11          |
| XLOC_007433    | PIDD           | PPP1R18        |
| C7orf61        | XLOC_008556    | PLA2G10        |
| FLYWCH2        | XLOC_12_013873 | XLOC_12_003974 |
| PI4K2A         | CMTM1          | HSD11B1L       |
| PLCXD1         | LOC100509256   | LOC100509620   |
| CYP39A1        | ZNF77          | FANK1          |
| SEMA6A         | XLOC_013732    | XLOC_008781    |
| MAN1A1         | TESK2          | GJB4           |
| HSD11B1L       | KCNF1          | PORCN          |

TNNT2  
ISYNA1  
XLOC\_005039  
C9orf116  
DPF3  
XLOC\_006933  
PPP1R13B  
GPR137C  
C7orf43  
COL21A1  
LOC100507420  
XLOC\_12\_006745  
XLOC\_011350  
BACE1  
FBXO43  
PVR  
TRIM36  
ABCD1  
SLC25A35  
LOC100130157  
NXPH3  
ALAD  
LOC100507563  
AGPAT4-IT1  
LOC100131796  
LOC100131551  
C1orf55  
OTUB2  
CCDC84  
PDE6D  
LOXL3  
GPR111  
ASMT  
LOC728228  
LOC100652777  
IGSF8  
TNFAIP3  
TCEAL6  
LINC00310  
ID4  
WDR60  
ZNF433  
ZFYVE28  
CCDC87  
SHD  
OASL  
FRY  
EPPK1

NAV1  
ZNF296  
GPR137C  
RNU11  
SCIN  
GPAT2  
XLOC\_006726  
XLOC\_006321  
KIF7  
SLC3A2  
RASGEF1B  
C6orf132  
ANKRD2  
WDR60  
TSPAN33  
LOC652990  
LOC100128857  
SLC9A3R1  
POLR2F  
AKAP5  
LOC283624  
SPON2  
ZNF221  
GKAP1  
PLAT  
SBF1P1  
MAST3  
AVIL  
TRIM3  
ATXN1L  
CASQ1  
CCDC84  
TNXB  
PRKCE  
GGTLC1  
AQP11  
MAPK8IP1  
ETS1  
CDC42BPG  
DAAM1  
C16orf55  
KLRG2  
ZSWIM4  
UBE2Q2P1  
DPF3  
ACCN3  
MAPT  
NIPAL3

PREX1  
ARFGAP1  
SLC28A1  
SGK223  
MYO10  
ATG16L2  
PYGM  
ACSF2  
HKDC1  
RNU12  
PRINS  
SOX8  
SNAPC4  
XLOC\_12\_008888  
CYHR1  
VTRNA1-1  
CGB  
EGLN3  
MICALL2  
LOC100130547  
FLJ30064  
XLOC\_013506  
SUN1  
FAM65C  
REEP6  
LOC283050  
FAM166A  
ALAS1  
LINC00482  
XLOC\_12\_015209  
COL6A1  
C16orf70  
EFCAB3  
MKLN1  
LOC100134138  
PDHA1  
TMEM110  
TBC1D17  
MID2  
CELSR2  
RBSG2  
SNORA53  
NIPAL3  
FUZ  
CT45A1  
TRIM10  
PTGS1  
SLC7A5P1

|                |                |                |
|----------------|----------------|----------------|
| LOC100506120   | ARHGAP39       | PLXNA4         |
| ST6GALNAC4     | KHK            | XLOC_001134    |
| LOC440900      | GOLT1A         | SBSN           |
| PIGR           | PPIEL          | PSORS1C3       |
| CAMTA1         | DAGLB          | XLOC_005087    |
| PRDM2          | DIP2C          | NOSIP          |
| CILP           | LOC100130276   | DNAJC12        |
| EID2B          | LOC400084      | DOK3           |
| ORAOV1         | CTH            | ELL2           |
| PPARD          | MB21D2         | FAM3B          |
| C4orf32        | UNC5CL         | TP53AIP1       |
| STK17B         | XLOC_001134    | PI3            |
| EHD1           | ERI1           | AK7            |
| GDF11          | RANBP6         | KIAA0930       |
| CX3CR1         | CHRD           | XLOC_011872    |
| XLOC_009868    | SERP2          | XLOC_000683    |
| XLOC_001738    | MAP2           | XLOC_12_015033 |
| PLIN1          | PGM2L1         | C1orf226       |
| GABRE          | MIAT           | LOC338758      |
| TOR1B          | IGFALS         | GSTM1          |
| USHBP1         | FAM167B        | LOC100499467   |
| DBN1           | DNAH6          | GAFA3          |
| XLOC_000755    | ARHGEF18       | ATG9B          |
| ELL2           | LOC100130849   | XLOC_014139    |
| USP35          | ZMIZ2          | C15orf48       |
| PPAP2A         | SAMD8          | ING1           |
| FLJ22763       | XLOC_004827    | SLC38A2        |
| GRHL1          | PDHA1          | AIM1L          |
| LOC401052      | TMEM45B        | XLOC_001788    |
| SAG            | XLOC_12_001064 | ODF3B          |
| PTK2B          | FLJ23867       | RTBDN          |
| TPRN           | TRAM2          | PPP1R15B       |
| XLOC_009261    | MAFB           | C10orf54       |
| LCA5L          | XLOC_014105    | CLSTN3         |
| DAPK3          | XLOC_002383    | TBC1D10A       |
| LOC440792      | BAI1           | XLOC_000794    |
| SLC24A6        | SERTAD1        | SCARNA20       |
| ANKRD29        | CATSPERG       | FLJ16124       |
| NGEF           | XLOC_12_015127 | ATP13A2        |
| XLOC_004046    | DEGS1          | ZNF221         |
| TCFL5          | ALS2           | DENND2C        |
| RPS6KA2        | SGPP1          | FOXD4          |
| PPP1R14C       | ADAM11         | IFNAR2         |
| FAM85A         | ISYNA1         | MSMB           |
| XLOC_12_010602 | APBB2          | C21orf88       |
| XLOC_005810    | XLOC_12_014098 | XLOC_12_010831 |
| RHOB           | TNFRSF11A      | PHLDB3         |
| TNFRSF4        | GK3P           | GPR153         |

|                |              |                |
|----------------|--------------|----------------|
| ZDHHC11        | KIDINS220    | GPRIN1         |
| XLOC_011413    | MYLK2        | XLOC_008614    |
| CEP112         | S1PR4        | LEPRE1         |
| XLOC_007908    | C3orf45      | CCDC126        |
| IRF7           | TBC1D20      | XLOC_005968    |
| ENGASE         | FAM82A2      | SERTAD1        |
| C14orf55       | TNNT2        | SCIN           |
| RAB7L1         | WNT10B       | TMEM38A        |
| LOC100506268   | TTC7A        | KIAA0913       |
| LOC100652769   | LOC100129380 | LOC645195      |
| LOC100129781   | MARK4        | KIAA1539       |
| LOC100505760   | ULK1         | TM2D2          |
| THPO           | MYT1         | LOC344595      |
| ADAT3          | XLOC_009944  | ADA            |
| FOXD1          | CHST7        | FZD2           |
| CIB2           | SNX30        | C6orf132       |
| XLOC_013788    | MAPK8IP3     | GABBR1         |
| USP17          | LOC143188    | XLOC_12_008151 |
| SEMA3G         | XLOC_006994  | SLC9A5         |
| TMEM38A        | TOR1AIP2     | HOXA1          |
| XLOC_12_014579 | C7orf53      | RGS14          |
| XLOC_014219    | FUCA1        | KLHL26         |
| ADAMTSL4       | EFNA4        | XLOC_001537    |
| XLOC_12_013116 | NCKAP5L      | KISS1          |
| KRTAP5-9       | FOXJ1        | CIB2           |
| RBP7           | KRT16        | USP35          |
| TNFRSF25       | RNF223       | CRYGS          |
| WNT1           | BACE1        | RIPK4          |
| RHOF           | HEBP1        | MARK4          |
| XLOC_010601    | XLOC_013788  | SLC46A3        |
| MICA           | NRP2         | ANKRD29        |
| AHRR           | NR2E3        | TSC22D2        |
| XLOC_012568    | C8orf47      | NAB2           |
| MFAP2          | MLLT4        | NEK10          |
| XLOC_014096    | TMEM81       | SAT2           |
| DDIT4          | ADARB1       | OCEL1          |
| CELSR2         | ROPN1        | XLOC_004606    |
| XLOC_004282    | ALAD         | ANKRD27        |
| CYP26A1        | TMEM132A     | NGEF           |
| DMPK           | NFE2         | JARID2         |
| FAM49A         | C10orf116    | PAX7           |
| CBR3           | SPACA4       | C7orf43        |
| EFNB2          | LOC100505904 | C4orf47        |
| COQ10A         | CXorf41      | WISP2          |
| LOC440132      | KIFC2        | IRGQ           |
| TP53INP2       | XLOC_001048  | KLK5           |
| ZNF461         | ADORA2B      | MAPRE2         |
| NIPAL3         | OSBPL7       | XLOC_12_012054 |



|              |                |                |
|--------------|----------------|----------------|
| DGAT1        | SLC41A1        | CDA            |
| PPARA        | PAG1           | HES2           |
| ADSSL1       | GPR157         | TCEAL6         |
| MAK          | NKPD1          | SLC30A4        |
| FAM90A7      | NAB2           | HLA-A          |
| FAM73B       | LOC100130930   | GRHL3          |
| TNF          | PPP1R32        | LOC100507588   |
| PDXP         | GIT1           | PIP5K1C        |
| MAGI2        | FLJ30403       | XLOC_12_004640 |
| NEXN         | FBXL18         | LOC100129675   |
| TMEM110      | ATP2C2         | OSBP2          |
| XLOC_007205  | LOC389791      | LOC100129781   |
| FAM53C       | P2RX5          | DNM1P46        |
| ITLN2        | LOC100130417   | XLOC_12_007371 |
| HECW2        | C16orf70       | TGIF2          |
| RSL1D1       | AGPAT9         | XLOC_003522    |
| CDC42BPG     | UBE2Q2P3       | FHL3           |
| POU2F3       | FAM59B         | FBXO32         |
| LOC400084    | XLOC_007368    | KIF3A          |
| XLOC_013932  | CLDN6          | TP53INP2       |
| C16orf5      | RIOK3          | C22orf23       |
| LOC100652768 | HSPB8          | CYP3A5         |
| GATS         | C19orf28       | CLIC3          |
| XLOC_013549  | RBP5           | MKNK2          |
| LOC339524    | ADAM32         | TMEM132A       |
| SEMA4D       | IRF6           | CMTM1          |
| PAGE2B       | VMO1           | GIT1           |
| XLOC_013866  | XLOC_12_013267 | TNFSF15        |
| PRKCD        | XLOC_008711    | HBA2           |
| Q9RWL9       | TMEM136        | MYOM1          |
| ZFP2         | XLOC_003474    | C16orf87       |
| RAB8B        | EFHC1          | SNHG12         |
| FLJ30403     | SOCS7          | SCARNA8        |
| FAM154B      | RNF39          | SLC24A3        |
| LOC90246     | RSL1D1         | CD177          |
| XLOC_009457  | ENPP1          | TBX3           |
| TSPAN4       | GPC1           | SERP2          |
| RAB11FIP1    | sept-04        | ATP1A3         |
| XLOC_005488  | IL6R           | MAPK15         |
| FBXO36       | LIN37          | SLC35E4        |
| XLOC_000055  | LOC440905      | PDGFRL         |
| SGK1         | PCOLCE         | G0S2           |
| GCDH         | PPIL6          | EFNA4          |
| XLOC_001099  | CCDC42B        | SMAD5-AS1      |
| KCNN4        | C10orf47       | ADAMTSL4       |
| GCNT1        | LOC285141      | RXFP4          |
| SNORA14A     | SNORA17        | STARD9         |
| XLOC_001916  | XLOC_014399    | CCDC42B        |

|                |                |                |
|----------------|----------------|----------------|
| UNC119         | LOC284440      | ICOSLG         |
| LMBR1L         | MUC17          | XLOC_007775    |
| PLAU           | LOC388152      | IL28RA         |
| FAM182B        | XLOC_009526    | THBS1          |
| SPON2          | LOC729040      | ULBP1          |
| GNAS-AS1       | ANKRD13D       | H1FX           |
| KDELC1         | B3GAT3         | SNHG7          |
| TLL11          | CIDEC          | ZBTB48         |
| XLOC_008100    | FGD6           | XLOC_011016    |
| AVPI1          | FAM182B        | ISYNA1         |
| TUFT1          | LOC143666      | ANKRD13D       |
| GABBR1         | ZNF177         | GAS2L1         |
| RAB26          | LLGL2          | LOC100132077   |
| DGCR14         | PACSIN2        | KIDINS220      |
| RNF122         | LIX1L          | WRAP53         |
| ZDHHC20        | ABHD6          | CCDC144A       |
| XLOC_008223    | SCG5           | C8orf46        |
| LOC100128402   | WFDC10B        | INSIG2         |
| LOC338653      | TNNI3          | EFR3B          |
| SEC14L2        | LOC100132474   | DDR2           |
| SERHL2         | XLOC_12_006152 | CARD14         |
| RPL23AP32      | RTN4R          | APLP1          |
| XLOC_12_013267 | PIP5K1C        | RELL1          |
| CT45A1         | Q6BWL2         | SH2D6          |
| LOC100506047   | FBXO36         | GOLGA6L9       |
| XLOC_12_011873 | IGSF3          | HLA-F          |
| KIAA1462       | XLOC_12_001138 | FAM126A        |
| SPIRE2         | TP53INP1       | TNFRSF10B      |
| SOX8           | VTRNA1-2       | SHF            |
| MID2           | TOR1B          | SYS1           |
| LOC100128071   | ATP8B3         | KCNN4          |
| MSMB           | ETV3           | ZNF324         |
| XLOC_000508    | HEXIM1         | NLRP12         |
| RGS9BP         | GATS           | PIDD           |
| XLOC_013100    | FSD1           | CDC42EP2       |
| RTKN2          | FLJ43315       | GPBAR1         |
| XLOC_010114    | MAN1A1         | XLOC_12_015034 |
| NAGS           | UBE2Q2P2       | SPATA2L        |
| NPHS1          | XLOC_12_005695 | HSP90AB4P      |
| RNF157         | LONRF2         | ABCD1          |
| INPP5K         | GLIS3          | DNAL1          |
| XLOC_001338    | RNF114         | SEMA3G         |
| GLCE           | PLK3           | ENDOU          |
| Q8N7V6         | HIST2H2BF      | DZANK1         |
| XLOC_014137    | CHST12         | PDE9A          |
| WDR78          | XLOC_012139    | KCNMB4         |
| LOC100133190   | RIPK4          | XLOC_001230    |
| SEC14L4        | ITGA10         | C2orf48        |

|                |                |                |
|----------------|----------------|----------------|
| LOC100507118   | ASB6           | PTAFR          |
| STRC           | PLEKHG5        | GADD45A        |
| ADA            | FBXO16         | SHD            |
| GJB7           | FLNB           | XLOC_013981    |
| ATXN1L         | LOC619207      | TNNI3          |
| KCNMB4         | MICALL2        | C6orf154       |
| SLC16A10       | NBEA           | UBXN10         |
| FAHD1          | POU3F3         | AVIL           |
| ARHGAP26       | ZBTB48         | CCDC64B        |
| C6orf154       | ST5            | XLOC_013866    |
| GGT8P          | IDI2-AS1       | PPP1R14C       |
| ARHGAP4        | TTBK2          | SPTBN4         |
| CXCL6          | LOC100507364   | AKNA           |
| PPARGC1A       | ATP6V0A1       | PNPLA2         |
| GRHL3          | ZNF703         | MERTK          |
| XLOC_014237    | ENDOD1         | XLOC_009868    |
| MBP            | SNORA43        | GDPD5          |
| FAM18B2-CDRT4  | EFNB3          | ANPEP          |
| LOC100652995   | CCDC126        | DNAJB5         |
| PCSK4          | ELF3           | SNORD43        |
| XLOC_011287    | FAM194A        | TNKS1BP1       |
| MAP3K14        | XLOC_013955    | PLEKHH2        |
| LINC00163      | TNKS1BP1       | ZNF707         |
| SPTB           | ZFYVE28        | ZNF703         |
| CYTH4          | ST6GALNAC3     | TSPAN4         |
| C22orf23       | XLOC_12_010494 | XLOC_012048    |
| LOC441268      | LOC153577      | GUCA1B         |
| CLGN           | PLIN3          | ARHGAP39       |
| HMHA1          | H19            | SLC25A44       |
| XLOC_12_007644 | SCARNA8        | OCR1           |
| SMPD1          | PRODH          | GLCE           |
| SLC16A12       | IGLL1          | RASSF10        |
| KCNN2          | TRIM25         | XLOC_12_006944 |
| NEDD9          | TCEAL6         | LOC100289211   |
| XLOC_006319    | SLC25A30       | SERPINE1       |
| RFPL3-AS1      | ADRA2C         | UNC5B          |
| ARNTL          | PYGM           | XLOC_007857    |
| TMEM229B       | AQP10          | UBE2Q2P2       |
| RGS9           | RAB24          | PLEKHO2        |
| NPHP1          | KIAA0895       | ARSK           |
| ASGR1          | XLOC_005087    | NTF4           |
| C18orf8        | LHX4           | LOC100652797   |
| UNC5B          | AZI1           | WHSC2          |
| MICB           | SRPK3          | NKX3-2         |
| ARSK           | HIC2           | SEC14L2        |
| TUBB8          | PHF1           | GFOD1          |
| ARMC2          | LAMA3          | WNT1           |
| RAB3B          | TMEM110        | RNF207         |

|                |                |                |
|----------------|----------------|----------------|
| CBX4           | SAT1           | KSR1           |
| XLOC_003327    | FAM89B         | ROM1           |
| XLOC_013602    | LOC283553      | ADAM8          |
| SYNDIG1L       | RPUSD1         | DNM3           |
| MEF2C          | XLOC_005082    | MIAT           |
| KIF3A          | SERTAD2        | PLEKHM1        |
| COX6B2         | LEMD1          | MPP2           |
| XLOC_005963    | LTB4R          | C10orf116      |
| CEBPB          | FLJ42022       | XLOC_12_014421 |
| SKI            | RILPL1         | SLC16A3        |
| PLEKHM3        | Q8N7V6         | GGTLC1         |
| LOC100506851   | LIN7B          | AQP2           |
| XLOC_002997    | XLOC_12_007834 | METRNL         |
| ADCY10         | GNMT           | LOC646890      |
| XLOC_003474    | PLGLB1         | LEFTY1         |
| XLOC_12_013853 | XLOC_12_015239 | ESAM           |
| FAM126B        | DNAJB5         | KIF5A          |
| NEURL1B        | TUBB2A         | FAM89B         |
| RBP5           | TSPAN4         | RASGEF1B       |
| PLD2           | FARP2          | XLOC_001916    |
| FBXW10         | AMH            | MUC17          |
| NRCAM          | MBP            | GNMT           |
| XLOC_000951    | CLDN23         | TRIM41         |
| NES            | LNX1           | TNK2           |
| XLOC_011765    | MPZL3          | MATN3          |
| ASB4           | IRGQ           | CDRT1          |
| ZFHX2          | LOC100506268   | LOC91450       |
| XLOC_003528    | XLOC_12_004854 | NEDD9          |
| SPATA18        | TRIM52         | LOC645638      |
| GLIPR2         | SHF            | TNNC2          |
| ARG2           | EREG           | LOC100132439   |
| XLOC_12_015033 | XLOC_009457    | IRAK2          |
| DCDC2B         | LOC100505555   | KLHL6          |
| PTPN13         | TMED6          | HS3ST6         |
| XLOC_013535    | COX6B2         | WDR47          |
| LIN7B          | LOC100132077   | LRRC17         |
| MATN3          | CPLX1          | ORM1           |
| RDX            | SNHG12         | IDI2-AS1       |
| LOC100130276   | PLXDC1         | COL8A1         |
| POLH           | LOC283050      | LOC440993      |
| AQP3           | DISC1          | KRT17          |
| SLC43A3        | XLOC_011480    | XLOC_12_003897 |
| LOC100130093   | XLOC_002133    | LOXL3          |
| XLOC_009683    | TMPRSS9        | CCDC88B        |
| PAG1           | NKAIN4         | FAM53C         |
| SEMA3F         | B3GNT4         | FLJ30403       |
| FLJ33534       | MAMSTR         | CCDC84         |
| ZNF75A         | XLOC_007262    | RETSAT         |

|                |              |                |
|----------------|--------------|----------------|
| IP6K2          | LOC100652965 | PPARA          |
| COL8A1         | LOC100507305 | LOC100132966   |
| CNIH3          | AIF1L        | RSL1D1         |
| C16orf79       | ZNF385A      | ERVK13-1       |
| ITGA10         | IRF7         | STXBP4         |
| LOC729609      | XLOC_006336  | XLOC_12_006751 |
| S1PR5          | HDAC10       | CITED2         |
| RELL1          | PPARD        | GJB7           |
| XLOC_004886    | RNF122       | CTSK           |
| CLSTN3         | LOC100133319 | TRAF3IP1       |
| KRT83          | PRSS8        | TRIM36         |
| LINC00336      | KIAA1462     | TOR1AIP2       |
| MEGF9          | GCDH         | SPEG           |
| XLOC_12_006751 | PIGH         | OBSCN          |
| HLA-DOA        | LOC100505787 | SSBP2          |
| ZSWIM6         | OXTR         | LOC100507614   |
| FSD1           | LMF1         | LOC100507278   |
| CCDC88A        | SLC12A7      | NOTCH3         |
| C2orf48        | LOC100507419 | C4orf32        |
| C15orf48       | SERPINE2     | PLIN3          |
| BBC3           | MRPL42P5     | CORO7          |
| ERRFI1         | XLOC_012192  | CCDC30         |
| XLOC_12_005553 | IL20RB       | ALDOC          |
| TUBB6          | LBH          | ABCA7          |
| APH1B          | CCDC116      | XLOC_002987    |
| KLK4           | XLOC_012568  | FAM90A1        |
| XLOC_002830    | LOC100287177 | IGSF8          |
| MRPL42P5       | SLC24A6      | H2AFJ          |
| RNF208         | ZNF324       | LOC100505787   |
| XLOC_007368    | TNFRSF1B     | LINC00173      |
| TRAF3IP1       | SLC24A3      | C1QL1          |
| LNX1           | DGCR5        | XLOC_000478    |
| IRGM           | SYNPO2L      | XLOC_006310    |
| XLOC_12_005517 | ANXA6        | PPP1R15A       |
| KRT35          | LINC00222    | DGCR14         |
| ZNF775         | XLOC_012596  | LOC100130849   |
| IL1RAP         | BAK1         | SMPD1          |
| ATP6V0D1       | ADAM8        | EMP1           |
| C8orf47        | ASMT         | TTLL6          |
| EXT1           | PELI3        | JAK3           |
| C18orf45       | FZD5         | PRICKLE3       |
| LOC100505787   | TTC39B       | AZI1           |
| XLOC_002122    | FAM102A      | RPL32P3        |
| SLC25A25       | PRIC285      | TESK2          |
| DDX25          | ECE1         | C18orf8        |
| ENDOU          | FAM53C       | RHPN1          |
| XLOC_008781    | DGAT1        | DCDC2B         |
| ITPKA          | SNORA61      | XLOC_000302    |

|                |                |              |
|----------------|----------------|--------------|
| VSIG8          | PI4KAP2        | TNXB         |
| CACNA1A        | VILL           | MAPK8IP3     |
| FLJ37644       | RSPH3          | PACSIN2      |
| BTBD11         | XLOC_002122    | RTKN2        |
| RBSG2          | XLOC_013370    | LOC728061    |
| CNNM2          | DNAI1          | C19orf67     |
| LOC100506802   | XLOC_008487    | LOC100129148 |
| BREA2          | LOC149773      | LOC440132    |
| WFIKKN2        | WWC3           | MEF2C        |
| DGKA           | LOC100505551   | USP17        |
| CDC14B         | CGB            | RPUSD1       |
| SP8            | HLA-A          | LOC100505555 |
| SCPEP1         | SPDYA          | ACAP3        |
| NKAIN4         | ADAP2          | HMOX1        |
| XLOC_006954    | FCHSD1         | NINL         |
| XLOC_12_008221 | TUBGCP6        | PXK          |
| APOC3          | MAP1LC3B       | POU2F3       |
| FAM27A         | LOC100505760   | MAPK11       |
| CTSK           | DHRS9          | XLOC_013732  |
| AQP10          | KCTD6          | LOC100507025 |
| ZNF217         | NXPH3          | SNORA61      |
| FBXL18         | KIAA1549       | XLOC_013323  |
| GAS1           | CDKL2          | KLHL5        |
| SPEG           | C1orf226       | TRIM52       |
| CRYGS          | HIVEP3         | HNRNPH1      |
| MRV11-AS1      | USP17          | GIPR         |
| SLC28A1        | RHPN2          | SLC22A13     |
| PPP1R32        | FLNA           | SPON2        |
| DNM3           | MRGPRF         | OXTR         |
| SLC9A1         | PLCB2          | N4BP2L1      |
| XLOC_12_000018 | LOC283887      | STK17A       |
| LOC606724      | KCNE2          | FAM118A      |
| GUCA1B         | MFGE8          | DISC1        |
| XLOC_12_011584 | LAMB2P1        | XLOC_013838  |
| ABTB2          | XLOC_001532    | SNORD50B     |
| BATF3          | XLOC_12_013116 | SPTBN5       |
| RNF39          | XLOC_009196    | LIPE         |
| AHDC1          | LINC00482      | JAKMIP2      |
| XLOC_12_009301 | FAM3B          | SH3PXD2A     |
| Q29HP5         | ARHGEF26       | BMP6         |
| ZNF890P        | LOC338620      | C1R          |
| SHC3           | C17orf76-AS1   | SAT1         |
| ABCB1          | GRHL3          | NOS1AP       |
| RPS24          | ACAP3          | CHAC1        |
| PRDM1          | NR3C1          | PRO0628      |
| IL1A           | C5AR1          | ANKRD33B     |
| ERVK13-1       | LOC100652797   | SPSB1        |
| LIN37          | PPM1N          | TAC3         |

|                |              |                |
|----------------|--------------|----------------|
| AKAP2          | PMEPA1       | UBE2H          |
| SERP2          | LIPE         | C1orf55        |
| TRIM50         | HSD3B1       | XLOC_12_013267 |
| SEC31B         | KDELC1       | NXF1           |
| UBXN10         | TBPL1        | XLOC_013370    |
| C14orf45       | PPP1R13B     | POLH           |
| C1R            | AFAP1        | XLOC_008691    |
| EFR3B          | DENND5A      | LOC643650      |
| GRAMD1A        | LOC100506802 | PI4K2A         |
| RASSF4         | LOC100507563 | NKIRAS1        |
| XLOC_009005    | CLDN9        | XLOC_12_013116 |
| UPK1A          | GRIN1        | LOC100507445   |
| TSC22D3        | LOC100130713 | DLL3           |
| RNF223         | POU2F3       | LOC100128857   |
| ATP1A3         | SLC16A12     | UBQLNL         |
| KLF4           | NKIRAS1      | PPM1N          |
| XLOC_12_000706 | FAM49A       | XLOC_004046    |
| LDLRAD1        | CHRM4        | ZFHX2          |
| MUSTN1         | DNHD1        | XLOC_013906    |
| COL23A1        | HPSE         | XLOC_001099    |
| SLC45A4        | PPL          | XLOC_005748    |
| SLC46A3        | LOC200609    | LCAT           |
| NUMBL          | TMPRSS7      | SYTL2          |
| ATPAF1-AS1     | NPC1         | GOLGA2         |
| PLEKHH3        | LOC283070    | LOC254100      |
| FLJ44124       | NFKB2        | VWA3A          |
| CHST12         | XLOC_006664  | GPR161         |
| GDF1           | ST6GALNAC6   | BACH1          |
| IL17C          | ZNF697       | RELT           |
| LOC389791      | ULBP3        | KRT80          |
| XLOC_002865    | NDRG1        | HIC2           |
| PEAR1          | SEC61A2      | MBOAT2         |
| SIRPG          | CACNA1A      | CHST12         |
| NTF4           | MAPRE2       | FRMD6          |
| CCDC114        | LRRC31       | EVI5L          |
| LBH            | PLA2G10      | CD36           |
| XLOC_014369    | PRSS35       | DMPK           |
| C21orf88       | XLOC_011769  | WNT10B         |
| MEF2B          | FAM40B       | XLOC_009146    |
| GNMT           | SOCS1        | CFP            |
| PODNL1         | XLOC_008100  | XLOC_014247    |
| PLA2G15        | XLOC_014237  | LOC283887      |
| PML            | XLOC_004725  | LOC644192      |
| LRFN3          | COL6A1       | GOLGA6L7P      |
| TESK2          | LMBR1L       | NAGS           |
| SEPX1          | LOC100506641 | RPL23AP32      |
| DZANK1         | SYTL2        | PGM2L1         |
| XLOC_003417    | RFPL1        | XLOC_002132    |

|              |                |                |
|--------------|----------------|----------------|
| BIRC3        | CARNS1         | LOC100132859   |
| PCOLCE       | XLOC_12_008203 | LG14           |
| TOR1AIP2     | TAC3           | XLOC_12_011244 |
| NCEH1        | C6orf154       | ARG2           |
| MCAM         | KIF3A          | RPS27          |
| PLEKHH2      | RASSF4         | GCDH           |
| LOC100130930 | SMAD7          | RFPL4A         |
| XLOC_009196  | LOC100652746   | PRKCD          |
| MFNG         | CIB2           | TUBB2A         |
| NHLRC4       | CBR3           | DGAT1          |
| XLOC_005413  | XLOC_010591    | XLOC_12_014802 |
| EPAS1        | RNF19B         | C12orf5        |
| ANKLE1       | NHLRC4         | CYP2B6         |
| CCDC136      | PTPN13         | XLOC_12_014579 |
| TLR5         | RAB44          | XLOC_010500    |
| PLXNA3       | ACSBG1         | XLOC_005963    |
| ENO2         | CDKL4          | C9orf139       |
| LOC100506881 | C22orf23       | SALL2          |
| XLOC_001351  | SAT2           | LOC100131821   |
| XLOC_008487  | C17orf109      | ABCA3          |
| C6orf165     | FNBP1          | SNORA44        |
| TIE1         | MFAP2          | EPAS1          |
| B3GAT1       | NPHS1          | DPY19L2P3      |
| JPH4         | RAB8B          | MICA           |
| KLHL17       | TTC21A         | SOD2           |
| LMCD1        | POLH           | CALML5         |
| PLGLB1       | EXD3           | LOC100652995   |
| ENPP5        | CCL3           | EFNB2          |
| XLOC_000478  | SLC46A1        | XLOC_12_005553 |
| XLOC_011421  | XLOC_009868    | SLC25A25       |
| MIOX         | XLOC_012593    | FAM73B         |
| CTIF         | LOC100507588   | GADD45G        |
| KREMEN1      | XLOC_001243    | PAGE2          |
| PITPNM1      | HSPB11         | ANKRD13B       |
| PLCG2        | GPCPD1         | PLIN4          |
| ASB2         | TTC9B          | GPR116         |
| FZD2         | IGFL1          | SOAT1          |
| SESN2        | LDHD           | LOC100506268   |
| KIAA1984     | KCTD17         | SLC5A11        |
| JAK3         | XLOC_000595    | PMAIP1         |
| TRIM15       | KLK4           | MBP            |
| EIF5A2       | SLC46A3        | MIB2           |
| ANKDD1A      | GLI2           | C18orf45       |
| DUOX2        | CYHR1          | ITPKA          |
| BAIAP2       | GPSM1          | LOC441268      |
| HNRNPH1      | IQCD           | NFKBIZ         |
| HLA-DMB      | IL4I1          | HIST1H1A       |
| WDR47        | ZNF385C        | MAFB           |



|                |              |                |
|----------------|--------------|----------------|
| PROC           | C17orf67     | RASAL1         |
| BTN2A2         | FOXD1        | TMEM63C        |
| PIM1           | VTRNA2-1     | Q8N7V6         |
| H19            | ADM          | SGTB           |
| C5orf27        | SERAC1       | FSD1           |
| C20orf54       | SLC43A3      | PPP4R1L        |
| TAC3           | PPIP5K1      | PCSK4          |
| CLDN11         | UBE2H        | KCNH2          |
| ARID3A         | VAX2         | XLOC_12_008221 |
| EXOC3L4        | TCEA2        | GDF1           |
| SSBP2          | HSPA2        | KRT23          |
| NANOS2         | PRSS53       | CRY2           |
| FSTL3          | LOC100129399 | DACT1          |
| HS3ST6         | XLOC_002277  | LOC100128402   |
| XLOC_012288    | CCL27        | C7orf61        |
| STARD5         | XLOC_013981  | XLOC_013549    |
| IL11RA         | JAG1         | SLC2A6         |
| LOC143666      | SLC16A3      | SLC22A4        |
| CASC1          | MGC4294      | IZUMO4         |
| sept-04        | ALDH1A3      | XLOC_010114    |
| ZMIZ2          | COL28A1      | MRPL42P5       |
| RIMS3          | XLOC_009191  | MAPK8IP2       |
| JAG2           | LOC100652777 | XLOC_012593    |
| LOC100653515   | LOC100652768 | LOC338653      |
| XLOC_008691    | ANKDD1A      | XLOC_012254    |
| SLN            | PI4K2A       | CX3CL1         |
| PGM2L1         | VTRNA1-3     | ITPRIP         |
| CBX2           | EML6         | CDC14B         |
| TIMP2          | PNPLA2       | TRIM31         |
| PNPLA3         | KLHL17       | VPS53          |
| LOC100294362   | FLJ39095     | C6orf222       |
| AGFG2          | C10orf129    | PLEKHM3        |
| SGTB           | LOC100288432 | XLOC_013100    |
| C12orf5        | SYT7         | ASMT           |
| KLHL25         | FAM85A       | RAB24          |
| XLOC_004607    | SYCE2        | TOX2           |
| GSDMB          | CLEC18B      | ADSSL1         |
| ADCY4          | C12orf5      | NEAT1          |
| VWA1           | XLOC_006513  | STARD5         |
| KIFC2          | XLOC_007205  | PLA2G15        |
| CXorf41        | KCNMB4       | SLC24A6        |
| XLOC_12_005179 | LILRB3       | SOBP           |
| RHBG           | XLOC_006178  | XLOC_013905    |
| RAB6B          | PNMA2        | LOC100652768   |
| SCARA5         | PLEKHO2      | FAM182B        |
| NEBL           | JUND         | XLOC_002830    |
| LOC619207      | GRK5         | LOC143666      |
| XLOC_002356    | SNORA14A     | NUAK2          |

|                |                |              |
|----------------|----------------|--------------|
| JAKMIP2        | LOC100506047   | LINC00310    |
| XLOC_010500    | ARHGAP26       | AQP10        |
| XLOC_006721    | DGKA           | XLOC_006941  |
| TRIM46         | TRIM4          | PLCXD1       |
| XLOC_009181    | TTLL13         | LOC100130930 |
| LOC100131581   | PLB1           | CCDC148      |
| XLOC_010599    | ZNF556         | MUSTN1       |
| VKORC1         | RASGEF1A       | WTAP         |
| PLA2G4E        | XLOC_12_014421 | JAG2         |
| CRY2           | SERPINA5       | ASB6         |
| LGI4           | ALDH8A1        | IP6K2        |
| FXVD7          | CABYR          | S100A3       |
| LOC440993      | VSIG8          | CACNA1A      |
| LOC729652      | PRKCD          | KCNC3        |
| TCEA2          | RPL23AP32      | SLC43A3      |
| WISP2          | BMP2           | LOC100506802 |
| LOC100507025   | LOC285768      | CDH3         |
| HABP4          | GDF11          | FAM55C       |
| N4BP2L1        | CBX2           | C11orf94     |
| ATAD3C         | KLHL5          | Q6BWL2       |
| NR1H4          | LOC728802      | ZNF75A       |
| XLOC_005223    | XLOC_005039    | HCN3         |
| PLEKHG5        | GAST           | RAB8B        |
| XLOC_012192    | CTSK           | FZD4         |
| SBSN           | ARNTL          | NUMBL        |
| GP6            | SLC31A2        | ST6GALNAC4   |
| WNT5B          | SEC1           | LOC100507305 |
| CDKN2D         | TMEM206        | CMTM2        |
| FAM102A        | XLOC_001338    | METRNL       |
| CHP2           | ZDHHC20        | GATS         |
| LOC731789      | XLOC_12_009883 | C9orf72      |
| NRGN           | ZDHHC11        | HUS1B        |
| LOC100289488   | IRF8           | PLGLB1       |
| PAPD5          | CT45A5         | CLDN19       |
| XLOC_007189    | TRIM15         | UNC119       |
| JAKMIP3        | IRF1           | XLOC_001338  |
| ZNF540         | RELT           | XLOC_009943  |
| LOC100506418   | C10orf54       | DIXDC1       |
| VPS53          | TSC22D2        | LOC285141    |
| XLOC_12_014802 | PLEKHH3        | XLOC_002277  |
| CHKA           | WNT6           | LOC285147    |
| CLEC18B        | ITGB7          | DDIT4        |
| XLOC_003457    | MAPKBP1        | ARNTL        |
| XLOC_012021    | RPS24          | AGFG2        |
| ARID3B         | PAGE2B         | TPRN         |
| LOC148638      | CCDC19         | MAP4K2       |
| SLC24A3        | ZNF775         | PHF1         |
| RFPL1          | INSL4          | XLOC_012021  |

|                |                |                |
|----------------|----------------|----------------|
| NR3C1          | PALM3          | LOC389791      |
| LOC100129268   | XLOC_011413    | RAB11FIP1      |
| XLOC_002515    | C17orf96       | XLOC_012912    |
| PTGER4         | GLCE           | CDH16          |
| INPP5J         | C10orf114      | CD70           |
| CLIP2          | INPP5K         | JUND           |
| XLOC_12_012847 | FAM161B        | C17orf67       |
| FANK1          | N4BP2L1        | LOC100131796   |
| LOC100507305   | LOC644242      | COX6B2         |
| ACTA1          | FAM131A        | TOR1B          |
| ST3GAL4        | XLOC_12_002171 | RAB36          |
| KCNE2          | GSTM4          | RARA           |
| LCA5           | LOC100128292   | PNPLA1         |
| DISC1          | MFSD4          | XLOC_009683    |
| KIAA1467       | RDX            | XLOC_013955    |
| MYBL1          | C7orf57        | SNORA43        |
| DENND3         | KISS1          | LOC440792      |
| CDH3           | PIGR           | STRC           |
| SYTL2          | PORCN          | TNFRSF6B       |
| HOXC13         | EEF1DP3        | C15orf62       |
| MYOM1          | VLDLR          | MMP13          |
| CPLX3          | SLC26A1        | PHYHIP         |
| TOX2           | LAG3           | SPIRE2         |
| TTYH2          | CYP1B1         | XLOC_12_012748 |
| PAX7           | CCDC114        | IL27RA         |
| TCAP           | DENND1C        | XLOC_013218    |
| DKFZp686M1136  | LRFN3          | LOC100289424   |
| ULBP2          | AIM1L          | CD74           |
| GRASP          | LOC100294362   | OTUB2          |
| DNAI1          | CLEC3B         | SYTL3          |
| BCAS4          | SLC25A25       | XLOC_005341    |
| SORBS1         | RFX2           | LOC100505551   |
| C1S            | NEDD9          | PLXNA3         |
| DOCK4          | MMP15          | XLOC_12_009301 |
| ASMTL          | COL8A1         | XLOC_001457    |
| ULBP1          | C7orf52        | STMN4          |
| SCIN           | SLC2A5         | SGK1           |
| DIXDC1         | CFP            | TSGA10         |
| XLOC_003629    | SH3PXD2A       | TERF1          |
| CDH16          | TSPAN9         | XLOC_003417    |
| ZNF703         | XLOC_003734    | JPH4           |
| KANK3          | SERHL2         | XLOC_013932    |
| SLC28A2        | ITPR1          | CACNA1G        |
| C10orf114      | INHBB          | KIAA1462       |
| WNT6           | TSPAN10        | XLOC_002131    |
| SLC25A34       | XLOC_12_009292 | FBXL18         |
| XLOC_008809    | LHX1           | CCDC136        |
| PELI3          | XLOC_011350    | KLK8           |

|              |                |                |
|--------------|----------------|----------------|
| PFKFB4       | LOC100130547   | PDGFB          |
| DNAH12       | IL32           | BTN1A1         |
| ARG1         | MLLT11         | CDX1           |
| LHX4         | APLP1          | MEF2B          |
| PLCD4        | XLOC_009487    | LOC440934      |
| KLK13        | XLOC_12_001537 | SLC31A2        |
| ADAM11       | LOC344595      | IL1RAP         |
| LOC644192    | XLOC_12_001134 | EID3           |
| XLOC_009146  | MYO1E          | TNFRSF25       |
| LEFTY1       | SH2D1B         | ITGA10         |
| HIVEP3       | LOC401052      | XLOC_007368    |
| LOC285141    | PLXNA4         | TUFT1          |
| HIC1         | ALAS1          | PLD2           |
| TMEM52       | USP35          | PLEKHH3        |
| UBTD1        | NFKBIE         | LOC100506001   |
| TTL6         | SPAM1          | AP3B2          |
| LOC100506252 | LOC440330      | FAM90A7        |
| COL28A1      | TEX14          | OASL           |
| SLC25A27     | BCO2           | LOC100287415   |
| C17orf67     | EFNB2          | MYO15B         |
| HIST2H2BF    | GDPD1          | FAM49A         |
| HVCN1        | FUT7           | IGFALS         |
| LOC100128292 | Q9DSJ7         | PDXP           |
| FILIP1L      | IDS            | PROC           |
| sept-01      | TLE6           | IQUB           |
| SLC22A13     | WHSC2          | NHLRC4         |
| CCDC146      | GSDMB          | TRPC1          |
| NINL         | LOC284551      | INPP5J         |
| XLOC_011559  | XLOC_12_007427 | MFSD4          |
| GLRX         | RGS16          | XLOC_004165    |
| sept-03      | TRAF3IP1       | ELF3           |
| HIST1H1T     | XLOC_002085    | CGNL1          |
| CCDC42B      | TBX19          | IRF7           |
| CCDC153      | LOC100499221   | CALCOCO1       |
| AOC3         | PLXNA3         | FCRL5          |
| MBOAT2       | ZNF519         | DLX4           |
| DMBX1        | FLJ42392       | VTRNA1-2       |
| LOC100287177 | KCNN4          | NKAIN4         |
| ADRB1        | XLOC_003417    | XLOC_12_007783 |
| LOC100506854 | WDR96          | XLOC_001351    |
| CABLES2      | HLF            | IL1RL1         |
| HCN3         | PLD2           | FLJ45983       |
| LOC100287082 | KCNH2          | TSNAXIP1       |
| TAOK3        | CLDN11         | SORBS1         |
| ST6GALNAC6   | POR            | TMEM236        |
| DLX4         | XLOC_000011    | SOCS1          |
| LOC729444    | FYN            | COL28A1        |
| LOC100507419 | LOC100132354   | CLEC16A        |

|                |                |              |
|----------------|----------------|--------------|
| MFSD4          | XLOC_013838    | CA4          |
| ARHGAP30       | VCL            | GABRE        |
| PCYOX1L        | ZNF711         | XLOC_014402  |
| KCNK7          | MEF2B          | ATXN1L       |
| XLOC_013218    | DAPK3          | LOC100133190 |
| NLGN2          | VPS53          | RPPH1        |
| MAMLD1         | FAM115C        | SIRPG        |
| IL36G          | GDPD5          | ARHGAP26     |
| LOC283484      | RGS9           | N4BP2L2      |
| TOM1L2         | CACNA1G        | XLOC_014047  |
| TNNT1          | ST6GALNAC4     | GRAMD1A      |
| DUSP1          | XLOC_008466    | LNX1         |
| XLOC_002296    | CCDC136        | XLOC_008679  |
| SLC31A2        | LOC100507445   | GSDMB        |
| XLOC_12_002204 | CNPY4          | SEMA3F       |
| SOAT1          | XLOC_006721    | KCNN2        |
| CALCOCO1       | EHD1           | XLOC_000822  |
| AK7            | SCN4A          | XLOC_007504  |
| MAPK8IP2       | PACSIN1        | XLOC_000508  |
| RASAL1         | KCNJ10         | LOC100506881 |
| SAMD14         | DEFB1          | XLOC_012568  |
| CPEB4          | TMEM229B       | INPP5K       |
| RSPH4A         | PRRT4          | LOC387895    |
| NEU1           | PLIN1          | FLJ26086     |
| PI4KAP1        | GLI1           | ANKLE1       |
| XLOC_006150    | XLOC_12_005553 | HMHA1        |
| XLOC_001134    | SLC4A9         | C20orf96     |
| TRPC1          | LOC100288092   | TAS1R3       |
| XLOC_010194    | DLL3           | XLOC_008809  |
| C7orf53        | TNK2           | BTN2A2       |
| LOC100289211   | MERTK          | OSM          |
| NOTCH3         | ABCB1          | PNPLA3       |
| LOC100131355   | SPSB1          | AOC3         |
| XLOC_001457    | CSDC2          | LOC338620    |
| CLEC16A        | NOS1AP         | GLIPR2       |
| TMCO2          | XLOC_000102    | TRIM50       |
| LOC100505679   | PRKCA          | FBXW10       |
| SUFU           | MICA           | LILRB3       |
| SPDYA          | PPP1R15B       | LOC90246     |
| DLL3           | LRRC8E         | LCA5         |
| RAB36          | CORO7          | EXT1         |
| PRSS53         | CNNM2          | HIST3H2BB    |
| XLOC_004584    | LGALS7         | LRFN3        |
| CA4            | LOC100130987   | SKI          |
| KCNH2          | ATG2A          | FRY          |
| USP49          | CDKN2D         | DKFZP564C196 |
| LOC344595      | TNFAIP8L2      | XLOC_001048  |
| SLC22A4        | SGCA           | CCDC116      |

|                |                |              |
|----------------|----------------|--------------|
| MSX2           | GADD45A        | XLOC_010194  |
| RETSAT         | PRODH2         | KIFC2        |
| NOVA2          | LOC643201      | XLOC_012946  |
| CT45A5         | ATP8A1         | XLOC_009398  |
| LOC100505566   | RAET1K         | XLOC_008149  |
| SLC4A3         | NTNG1          | XLOC_000214  |
| MSX1           | LOC283588      | XLOC_011633  |
| FZD4           | MOGAT1         | XLOC_003327  |
| CYR61          | ASCL1          | KIAA1984     |
| C12orf34       | CNGA1          | LOC100130093 |
| EFEMP2         | LOC645195      | PLEKHG5      |
| H1F0           | C2orf48        | XLOC_013772  |
| XLOC_000595    | KLHL15         | XLOC_009526  |
| EFNB3          | TPRN           | ZC3H12A      |
| MEIS3          | SIRT2          | XLOC_013301  |
| N4BP2L2        | AHDC1          | IL11RA       |
| XLOC_002918    | XLOC_003872    | NEU1         |
| XLOC_002033    | TNFRSF25       | C6orf81      |
| LOC100129148   | XLOC_12_009301 | XLOC_009752  |
| FRMD6          | TRIM50         | FOXD1        |
| RUNDC3B        | MTSS1L         | ASGR1        |
| RPL37A         | STARD5         | CSDC2        |
| SYTL3          | XLOC_12_012323 | PTHLH        |
| PARD6G         | PPARA          | XLOC_001074  |
| SIPA1          | MPP2           | XLOC_007205  |
| XLOC_12_006080 | HVCN1          | SNORD101     |
| SLC25A41       | LOC646999      | sept-03      |
| LOC100507233   | DAPK2          | GTPBP3       |
| FAM3B          | MAPK15         | LOC100506047 |
| PAGE2          | EMP1           | FLJ42392     |
| GJB5           | XLOC_013712    | GP6          |
| ADARB1         | XLOC_002830    | C16orf79     |
| CAPN5          | AQP3           | XLOC_014219  |
| CNIH2          | SGK223         | KLRG2        |
| MAST1          | LOC100507639   | SNORD99      |
| LOC646890      | DOK3           | RASD1        |
| PPAPDC3        | XLOC_004046    | ERRFI1       |
| MCF2L          | CSGALNACT2     | XLOC_013602  |
| KIF25          | LOC442028      | TOM1L2       |
| LOC100506025   | TTL11          | BMP2         |
| NAP1L5         | HNRNPH1        | GDF11        |
| FKBP14         | FAM71A         | XLOC_008678  |
| XLOC_003427    | GDF15          | LOC619207    |
| LRRC17         | SPRR1A         | ZNF775       |
| C2CD2L         | INPP5J         | NCEH1        |
| ESPN           | PTK2B          | NCF1         |
| C17orf96       | PLCXD1         | TNNT2        |
| DPP6           | SRPX           | WNT6         |

|                |                |                |
|----------------|----------------|----------------|
| OTP            | XLOC_12_011291 | CRYM           |
| LRRC24         | XLOC_011331    | NPAS3          |
| MYZAP          | BBOX1          | MAST1          |
| STARD9         | GPRIN1         | XLOC_009183    |
| HAS3           | NFIL3          | KANK3          |
| C14orf37       | TMEM170B       | CDC42BPG       |
| IQUB           | XLOC_009943    | ZNF217         |
| KCTD17         | NCEH1          | XLOC_000755    |
| CGNL1          | MEGF9          | TMEM86A        |
| IL4I1          | CLSTN3         | LOC100130157   |
| C7orf63        | TNNT1          | C22orf31       |
| FMNL1          | PRKCG          | TCEA2          |
| FAM153B        | UNC119         | AGPAT4-IT1     |
| GLI1           | LINC00173      | CNGA1          |
| CDR2L          | SLC22A13       | MYBL1          |
| ACAP1          | CD109          | KLK13          |
| NPAS3          | RETSAT         | DGKA           |
| XLOC_12_003674 | KIF5A          | IRX4           |
| AP3B2          | MUC4           | KLHL17         |
| BMP8A          | CD274          | HIVEP3         |
| ASAP3          | ZNF815         | CTIF           |
| CCDC168        | SALL2          | ZNF296         |
| DLX1           | CEBPB          | XLOC_011287    |
| LOC100507131   | TANC2          | COLEC11        |
| ABCB9          | XLOC_12_007928 | ADAT3          |
| ATG2A          | LOC100289488   | XLOC_008441    |
| LOC100506001   | DCDC1          | ZSWIM4         |
| FOSB           | PHYHIP         | CSRNP1         |
| CNNM4          | TMC8           | CCDC146        |
| CLEC3B         | PNPLA1         | PTGER4         |
| DENND1C        | XLOC_013268    | XLOC_12_005517 |
| RASIP1         | JAKMIP3        | TIMP2          |
| XLOC_000340    | TMEM52         | XLOC_010315    |
| XLOC_011766    | LOC728978      | RAB34          |
| MMP13          | OVGP1          | DISP2          |
| GRK4           | SERPINE3       | MAK            |
| TMEM63C        | KCNN2          | FAM102A        |
| MAN1C1         | RAB30          | DUOX2          |
| PLEKHF1        | OSTBETA        | NES            |
| GDPD3          | PITPNM1        | XLOC_002122    |
| LIPC           | MUSTN1         | RASIP1         |
| XLOC_001243    | SOX8           | GOLGA6L6       |
| EPHB2          | KLHL25         | XLOC_002997    |
| NFATC4         | ALDOC          | NR1H4          |
| CCDC148        | XLOC_12_000706 | H1F0           |
| LOC338620      | PFKFB2         | PRSS35         |
| USH1G          | METRNL         | TSC22D3        |
| XLOC_010275    | PLEKHM3        | EPPK1          |

|                |              |                |
|----------------|--------------|----------------|
| PLEKHO1        | SNN          | ADM            |
| XLOC_013301    | CCDC153      | KRT83          |
| SPAG8          | MIR7-3HG     | CNNM4          |
| RAD9A          | RAD9A        | XLOC_010945    |
| LINC00173      | ANKRD42      | ENO2           |
| BLVRA          | MID2         | MYLK2          |
| MAMSTR         | FAM126B      | LIN37          |
| XLOC_007776    | TMCC3        | XLOC_002085    |
| CD36           | ESAM         | XLOC_011563    |
| TMEM158        | GUCA1B       | PIGR           |
| ALDOAP2        | GSTM1        | XLOC_012288    |
| XLOC_010942    | LOC100289187 | PELI3          |
| IER5           | TNFRSF10B    | XLOC_000340    |
| CLEC4A         | PLCG2        | XLOC_003881    |
| RFX2           | FAM126A      | MZB1           |
| ADAMTS7        | SDC4         | CDON           |
| VWA5B2         | NINL         | XLOC_12_014820 |
| DCDC1          | LOC100652915 | RGS16          |
| XLOC_000102    | RAB3B        | ACHE           |
| LPHN1          | CYFIP2       | XLOC_004361    |
| DACT1          | GRHL1        | FAM126B        |
| XLOC_000822    | LOC100289211 | EFNB3          |
| EVI5L          | PLCE1        | ESPN           |
| XLOC_005082    | WDR47        | DCDC1          |
| PI4KA          | MAST1        | XLOC_010601    |
| LOC285147      | MUC12        | ZMIZ2          |
| SPTBN4         | SLC9A5       | RIIAD1         |
| FAM55C         | NPHP1        | FMNL1          |
| XLOC_012339    | SPRED3       | LMBR1L         |
| VAX2           | XLOC_002132  | IZUMO1         |
| C16orf54       | SPTBN4       | LOC100130276   |
| PRSS35         | DISP2        | LOC100652769   |
| RORA           | PRRT2        | ASMTL          |
| FLYWCH1        | HCN3         | LOC100506219   |
| AQP7P1         | LOC100289090 | LOC100652740   |
| LOC100506791   | MYBL1        | GLI1           |
| PRKCG          | OASL         | H19            |
| IL16           | LRRC3        | CT45A5         |
| BTNL8          | RPL32P3      | SLC38A4        |
| SLC4A11        | FZD4         | KREMEN1        |
| XLOC_12_012942 | PLA2G15      | XLOC_005082    |
| LOC100130987   | DGCR14       | RPS6KA2        |
| TNNC1          | H1FX         | LOC100129999   |
| CDON           | LOC100131726 | HABP4          |
| WWTR1          | ENTPD2       | EPHB2          |
| PTGES          | FUT1         | ABCB9          |
| NACAD          | PPP1R15A     | BTNL8          |
| MPP2           | NLGN2        | GGT8P          |



|              |                |                |
|--------------|----------------|----------------|
| RHEBL1       | KCNK7          | SUFU           |
| XLOC_012593  | ATPAF1-AS1     | CLEC4A         |
| FOXJ1        | FAM55C         | SH2D1B         |
| SPAM1        | GPR153         | CABLES2        |
| FGF22        | RAPGEFL1       | FKBP14         |
| DSG3         | HES2           | XLOC_12_001947 |
| MSX2P1       | LOC90246       | PIM1           |
| ABHD8        | PLEKHH2        | DOCK4          |
| UNC5D        | XLOC_12_010602 | NAP1L5         |
| MYBPHL       | KREMEN1        | CYP46A1        |
| EEF1DP3      | LRRC24         | ULBP2          |
| XLOC_000302  | BTN2A2         | DKFZp451A211   |
| SPRED3       | EPPK1          | XLOC_014418    |
| BCL6         | XLOC_014369    | LPHN1          |
| GARNL3       | NR1H4          | MCAM           |
| FAM115C      | CRYGS          | TTC16          |
| CALHM3       | MAP3K14        | XLOC_012258    |
| VAV1         | RELL1          | PACSIN1        |
| CD109        | SPAG8          | LMCD1          |
| CRYM         | XLOC_008809    | XLOC_12_011798 |
| SNN          | RIMS3          | CBX2           |
| HEY1         | SLC26A11       | ATP6V0D1       |
| FLT3LG       | SLC22A15       | AEBP1          |
| C7orf57      | XLOC_12_003133 | RPS24          |
| GJD3         | TNFAIP3        | XLOC_012456    |
| S100A1       | AGT            | LOC729652      |
| DISP2        | NES            | XLOC_12_011291 |
| BMP6         | COL5A3         | ANKDD1A        |
| SH3GL3       | LOC100131366   | MYZAP          |
| ARHGEF25     | PRDM2          | RASL11B        |
| LOC151300    | PLEKHO1        | PLL            |
| LOC100505983 | LOC100506124   | EIF5A2         |
| C20orf160    | XLOC_12_014820 | EHD1           |
| FUT7         | C9orf174       | LOC100505679   |
| MYBPC1       | MCAM           | ST3GAL4        |
| C4orf47      | KIRREL2        | CPLX3          |
| PNMA2        | GLRX           | LOC100131726   |
| PRRT2        | VEGFA          | ARHGEF4        |
| KCNK4        | FAM73B         | XLOC_010591    |
| MIAT         | LOC100129171   | XLOC_008487    |
| IGSF9        | SPOCD1         | FLYWCH1        |
| XLOC_004361  | XLOC_001351    | LOC400548      |
| MOGAT1       | GFOD1          | SERPINC1       |
| CCR7         | RIIAD1         | RFX2           |
| XLOC_000670  | DUSP8          | CBR3           |
| CADM4        | KIF21B         | ZNF815         |
| PXK          | PTGER4         | RASSF4         |
| GLS          | LOC151657      | CDKN2D         |

|              |               |                |
|--------------|---------------|----------------|
| CCDC96       | C14orf45      | XLOC_006249    |
| FP588        | CD52          | XLOC_12_000792 |
| RBFOX3       | PDXP          | BCL6           |
| HSPB8        | AK7           | LOC100507639   |
| GPNMB        | KLHDC8B       | XLOC_009880    |
| KIAA1683     | IL17C         | XLOC_010245    |
| SH2B3        | LOC606724     | ST6GALNAC6     |
| XLOC_009274  | PARD6G        | SCARNA11       |
| XLOC_012258  | C7orf63       | LINC00202      |
| ELFN2        | TRPC1         | C1orf190       |
| PRODH2       | DKFZp686M1136 | XLOC_000111    |
| ABCA3        | DUOXA1        | C20orf54       |
| CSDC2        | HOXC13        | EGR2           |
| AMICA1       | L1CAM         | COL23A1        |
| LOC284688    | ERVK13-1      | AHDC1          |
| C6orf81      | AGPAT4        | GRIN1          |
| TSNAXIP1     | ACAP1         | MIR7-3HG       |
| DUSP10       | ZNF491        | TNNT1          |
| RASGEF1A     | PLCD1         | LOC100499221   |
| LOC340335    | C9orf72       | DAPK3          |
| XLOC_014402  | PKIG          | XLOC_12_000804 |
| LOC100288432 | GPR124        | XLOC_010599    |
| RNF24        | XLOC_000421   | SLC25A34       |
| MATN4        | FKBP14        | XLOC_014369    |
| PLL          | BTBD11        | XLOC_006994    |
| DUSP5        | C18orf45      | PCOLCE         |
| TBC1D10C     | ACTA1         | CD164L2        |
| CNGA1        | SKI           | ARID3B         |
| ABCG1        | GNG3          | MYBPC1         |
| KALRN        | XLOC_001788   | XLOC_007191    |
| TMEM45A      | CCDC80        | KRT35          |
| GNG3         | SPIRE1        | GLS            |
| UBQLNL       | H1FO          | SESN2          |
| ATCAY        | SIPA1         | AKAP2          |
| PREX1        | C11orf94      | DENND3         |
| RIIAD1       | IGSF9         | ZNF720         |
| GPC2         | SLC4A3        | ATPAF1-AS1     |
| SH3PXD2B     | ARHGEF25      | SEPX1          |
| LOC100129999 | OSBP2         | LOC100128292   |
| CNPY4        | LOC100129999  | HES5           |
| SLC2A5       | HKDC1         | PALM           |
| TMEM86A      | FSTL3         | LOC100507563   |
| SUSD2        | SOX2          | ATG2A          |
| GCCR         | SMOX          | ARID3A         |
| BEST1        | STAB1         | CHKA           |
| LOC254896    | SLC45A4       | HAS3           |
| LOC286299    | SCPEP1        | SNORA14A       |
| XLOC_004606  | MAN1C1        | CYP2U1         |

|                |                |               |
|----------------|----------------|---------------|
| CMTM2          | XLOC_005488    | LOC728705     |
| IL11           | Q93YZ4         | AQP3          |
| NAALADL1       | XLOC_002918    | KCTD17        |
| LPPR2          | MRVII-AS1      | XLOC_001243   |
| GATSL3         | XLOC_008223    | PITPNM1       |
| C7orf52        | GLS            | SNN           |
| XLOC_000101    | C1QL1          | CCDC153       |
| PACSN1         | AREG           | SIX1          |
| PPP2R5B        | SLC22A4        | CYP1A1        |
| HTR7           | LOC497257      | PFKFB4        |
| EPHA3          | NGEF           | HBEGF         |
| XLOC_011284    | XLOC_009684    | CLEC18B       |
| LOC100506662   | DIXDC1         | CD52          |
| ADAM32         | KLHL26         | FP588         |
| KCNJ10         | ST3GAL4        | CAPN5         |
| XLOC_12_001947 | PALM           | XLOC_014096   |
| DYNLRB2        | GCNT1          | UBTD1         |
| LOC283404      | LOC100130357   | NFATC4        |
| ST3GAL5        | TCAP           | SLC4A9        |
| XLOC_014336    | LCAT           | ELFN2         |
| DBP            | ADA            | LOC100287082  |
| LOC153577      | IER5           | C7orf52       |
| XLOC_12_014369 | SEMA3F         | NR3C1         |
| LOC646851      | PLAU           | NPHS1         |
| IZUMO1         | GCGR           | RNF122        |
| WFDC10B        | ST8SIA2        | TMEM52        |
| LGALS7         | FAM65C         | NFATC2        |
| BCO2           | XLOC_12_000961 | RNF39         |
| BIK            | XLOC_002997    | PTGIR         |
| XLOC_12_011291 | CASC1          | AMPD3         |
| SLC30A4        | VAMP1          | CNIH2         |
| LINC00312      | XLOC_012360    | ADCY4         |
| XLOC_12_013835 | OR51A2         | GARNL3        |
| DENND2C        | XLOC_010194    | SNPH          |
| C8orf31        | BLVRA          | NRGN          |
| SNPH           | SLC25A27       | XLOC_001198   |
| LOC400548      | SLC9A3         | LHX1          |
| XLOC_009167    | DAPL1          | DKFZp686M1136 |
| HEXIM1         | BMP8B          | VWA5B2        |
| LINC00202      | PLEKHF1        | GLRX          |
| XLOC_005927    | FGF22          | RAD9A         |
| XLOC_011040    | CGNL1          | BLVRA         |
| RBM44          | SLC6A13        | FLJ44124      |
| XLOC_12_000804 | SOBP           | XLOC_010557   |
| LOC100133669   | MOGAT2         | CCDC114       |
| SOBP           | CCL20          | LOC149773     |
| PPP1R14D       | GABBR1         | SPAG8         |
| XLOC_12_010386 | XLOC_013711    | NLGN2         |

|                |                |                |
|----------------|----------------|----------------|
| XLOC_013559    | XLOC_011827    | HEY1           |
| HIP1           | DOCK4          | ASAP3          |
| LOC100131726   | XLOC_009576    | FSCN3          |
| LRRC43         | TAOK3          | CYTH4          |
| PDZD7          | XLOC_12_003295 | ARHGEF25       |
| CD164L2        | ATP8B2         | HOXC13         |
| CYP46A1        | XLOC_004606    | IL8            |
| SYNGR3         | HIPK4          | XLOC_002400    |
| MUC15          | ASMTL          | FGF22          |
| ITGA7          | CCDC148        | ADAM32         |
| XLOC_002958    | RHOF           | C10orf114      |
| LOC100505573   | HIP1           | RNF223         |
| LARP6          | DMPK           | C7orf63        |
| OOSP1          | SPIRE2         | C7orf53        |
| CDKN1A         | PFKFB4         | TRIM15         |
| C19orf71       | CREB5          | MFNG           |
| NAV2           | C18orf8        | XLOC_008823    |
| LOC200609      | LOC728705      | BATF3          |
| ProSAPiP1      | XLOC_003854    | DENND1C        |
| XLOC_12_008599 | SPTSSB         | XLOC_12_013846 |
| CCDC40         | XLOC_013602    | LDHD           |
| C10orf129      | PIRT           | LOC100507419   |
| XLOC_011949    | CCDC146        | EVC            |
| PDE4A          | C12orf34       | XLOC_12_010386 |
| XLOC_009398    | LPAR5          | XLOC_12_012323 |
| DLX3           | LRRC43         | DNAH12         |
| XLOC_010470    | CYP26B1        | HPX            |
| SNTA1          | ARID3A         | LOC374890      |
| VAMP1          | SLC30A4        | HTR7           |
| XLOC_003854    | ANKRD29        | NGFR           |
| CCDC28B        | LOC349160      | XLOC_12_010558 |
| PLCD1          | TMEM236        | LOC441204      |
| TMC8           | XLOC_000388    | XLOC_011284    |
| TMEM236        | ASGR1          | ENTPD2         |
| NKX3-2         | XLOC_000101    | TPST1          |
| RCOR2          | FRMD6          | DMBX1          |
| RNASE1         | AKNA           | KLK4           |
| XLOC_011592    | XLOC_013100    | XLOC_013578    |
| XLOC_007515    | NFATC4         | C20orf160      |
| RFPL2          | XLOC_010542    | XLOC_000102    |
| Q9BVX4         | PODNL1         | LPHN2          |
| LYST           | ADAMTS17       | MSX2           |
| XLOC_006879    | CLEC4A         | ALPPL2         |
| TLE2           | PPARGC1A       | LOC100130987   |
| C1orf190       | SBSN           | PLK3           |
| XLOC_009016    | NEURL1B        | CXCL10         |
| SRPX           | TMCO2          | CLIP2          |
| XLOC_012596    | KIAA0319       | CLEC3B         |

|                |              |                |
|----------------|--------------|----------------|
| LOC100506219   | TIGD3        | WDR96          |
| TFCP2L1        | SLC23A2      | TAOK3          |
| EPOR           | HEY1         | HIC1           |
| LOC100505576   | FLRT1        | LPPR2          |
| PGF            | FMNL1        | WNT5B          |
| LOC284939      | BTNL8        | KLHDC8B        |
| PTGIR          | PNPLA3       | ADAM11         |
| PLA2G4D        | MSX2         | XLOC_010607    |
| PALM           | SAMD4A       | OTUD7A         |
| XLOC_013467    | C19orf51     | XLOC_002515    |
| LAG3           | S100B        | USHBP1         |
| KIAA0509       | MATN4        | VAX2           |
| HSPA2          | GDF1         | XLOC_12_009884 |
| MITF           | LOC100133190 | RNF208         |
| SELM           | C20orf195    | LARP6          |
| KLHL29         | KIAA0509     | FAM115C        |
| XLOC_006951    | SLC16A10     | XLOC_013968    |
| XLOC_006195    | C4orf32      | NANOS3         |
| ARC            | ERN1         | HIP1           |
| PCK1           | LCA5         | PDE4A          |
| SEMA6C         | TIPARP       | VSIG8          |
| HES4           | ENO2         | SNTA1          |
| XLOC_12_004631 | POLN         | BCO2           |
| XLOC_002132    | CCDC96       | LRRC6          |
| CROCCP3        | FILIP1L      | SESN3          |
| RND1           | LOC399715    | HCG22          |
| XLOC_12_012323 | LEPR         | LOC283435      |
| AQP7           | NLRC5        | CYP2F1         |
| CCDC30         | PLLP         | LOC100289488   |
| XLOC_011597    | LOC729609    | XLOC_010262    |
| SPTSSB         | NFATC2       | OSBPL6         |
| MICALCL        | SEMA3G       | LOC100131043   |
| HSD17B3        | LILRB5       | SLC9A1         |
| XLOC_12_007274 | GRASP        | XLOC_009452    |
| ATG9B          | B3GAT1       | TMEM25         |
| LOC731779      | HABP4        | BCAS4          |
| OSTBETA        | SLC6A12      | GJB5           |
| FNDC4          | DZANK1       | TSPAN10        |
| SH2D5          | CDH3         | IL16           |
| XLOC_000695    | CELSR2       | VEGFA          |
| GPR146         | SSBP2        | LOC100134285   |
| XLOC_12_007802 | LOC644192    | XLOC_12_011873 |
| XLOC_002788    | RHOB         | XLOC_001628    |
| WNT4           | LAMP3        | TLE2           |
| MAPRE3         | XLOC_009146  | WFDC10B        |
| SLC22A16       | CD164L2      | CNPY4          |
| SIX1           | KALRN        | SPRED3         |
| TTC29          | TTYH2        | XLOC_12_001064 |

|                |                |                |
|----------------|----------------|----------------|
| KRT86          | AMHR2          | AVPI1          |
| LOC100505473   | IGSF8          | RBM44          |
| ALDH8A1        | EPAS1          | IDS            |
| ENTPD2         | SGTB           | SIPA1          |
| BMF            | AHRR           | XLOC_013712    |
| ICAM5          | NRGN           | XLOC_12_011007 |
| CACNA1G        | ZNF541         | ZDHHC20        |
| XLOC_010506    | TRIM36         | XLOC_014137    |
| LOC100507639   | LPPR2          | WDR66          |
| HTR7P1         | ERRFI1         | NEBL           |
| XLOC_004534    | C15orf62       | XLOC_002918    |
| XLOC_006398    | FAM90A7        | CCDC96         |
| BCORL1         | MYOM1          | C8orf31        |
| XLOC_003907    | HTR7           | FOS            |
| ARL4C          | LOC646851      | STAB1          |
| LOC728705      | ASNS           | TMEM158        |
| FXYD4          | TMEM45A        | LRRC24         |
| S1PR2          | CSF1R          | SLC45A4        |
| S1PR4          | CSRNP1         | BAIAP2         |
| CYP2E1         | XLOC_011513    | XLOC_012114    |
| LOC100652843   | GBX1           | LOC100505894   |
| TMEM25         | XLOC_12_001947 | RHOB           |
| FAM46C         | RHEBL1         | SLC4A3         |
| C8orf60        | XLOC_12_007204 | LOC100505573   |
| XLOC_009224    | JAG2           | LOC100507131   |
| KRTAP5-8       | DOC2GP         | ADRB1          |
| LOC643201      | SEMA6C         | FILIP1L        |
| XLOC_012891    | KSR1           | PI4KAP1        |
| ZBTB46         | RSPH4A         | CROCCP3        |
| C3orf32        | CCDC88A        | NAALADL1       |
| XLOC_12_011798 | CCL21          | XLOC_010715    |
| XLOC_004557    | IRGM           | ZSWIM6         |
| LOC400927      | IL36G          | XLOC_007776    |
| LOC388242      | ENTPD8         | XLOC_12_014369 |
| XLOC_009601    | XLOC_011278    | C17orf96       |
| RHOXF1         | EMID1          | FAM85A         |
| XLOC_010945    | HTR7P1         | MCF2L          |
| DUSP5P         | NEU1           | Q29HP5         |
| TPST1          | AVPI1          | OOSP1          |
| COLEC11        | NUMBL          | LOC100507800   |
| LOC648149      | SLC7A5         | XLOC_12_004317 |
| NGFR           | MCF2L          | C6orf25        |
| NTNG2          | CYP46A1        | CRYGC          |
| LOC100506124   | FLJ44124       | PNMA2          |
| C20orf195      | ESPN           | NCF2           |
| XLOC_006902    | MEIS3          | GDPD3          |
| LILRP2         | NTNG2          | XLOC_000951    |
| PALM3          | CABLES2        | CD83           |

|                |              |                |
|----------------|--------------|----------------|
| SLC6A13        | KSR2         | XLOC_12_010083 |
| APOE           | OR2AK2       | RBP5           |
| LOC100505869   | XLOC_010942  | ADCY9          |
| XLOC_002872    | XLOC_007504  | PRSS53         |
| LOC100507430   | HMOX1        | XLOC_002069    |
| XLOC_013712    | SESN3        | XLOC_006844    |
| CERCAM         | PTHLH        | POU2F2         |
| ENTPD8         | N4BP3        | C8orf66        |
| MAP1LC3A       | CTIF         | LOC643201      |
| CITED4         | XLOC_009797  | C2CD2L         |
| IQCJ-SCHIP1    | LOC284939    | FTCD           |
| EGFL7          | TLE2         | KLHL25         |
| ADM2           | ITPKA        | LOC100506662   |
| LOC100288911   | LOC100507347 | S100A1         |
| HBA2           | LARP6        | LINC00051      |
| ANKRD42        | MBOAT2       | C13orf35       |
| MYO7A          | ARG2         | KIAA0509       |
| GPR123         | EPHB2        | CEBPB          |
| CERS1          | XLOC_010743  | SH3PXD2B       |
| XLOC_008466    | LOC100653515 | XLOC_007884    |
| CYP1A1         | CAPN5        | XLOC_008696    |
| C19orf51       | DENND3       | XLOC_004584    |
| XLOC_000256    | OTUD7A       | C12orf34       |
| ALPPL2         | EFEMP2       | KRTAP5-8       |
| ARID5A         | BCAS4        | LOC100128262   |
| TNFAIP8L2      | LOC728175    | XLOC_010374    |
| XLOC_007966    | TTL6         | CPEB4          |
| XLOC_002402    | EPOR         | LYST           |
| SLC26A11       | XLOC_012567  | RHOF           |
| C1orf170       | RHOXF1       | RASGEF1A       |
| SLC38A4        | TUBB6        | KIF6           |
| LRRC6          | MAK          | LOC100507233   |
| OR2T34         | IZUMO1       | XLOC_006195    |
| SLC29A4        | ITPRIP       | AMICA1         |
| XLOC_002821    | ZFH2         | ATP1A1         |
| GPR161         | TMEM98       | CCDC168        |
| KLRG2          | C2CD2L       | RIMS3          |
| PER1           | SLC25A41     | ABHD8          |
| WFIKKN1        | LOC100616668 | XLOC_005579    |
| FAM43A         | ADRB1        | GRK4           |
| XLOC_013993    | CCDC28B      | HTR7P1         |
| ADCY9          | CLIP2        | GJA3           |
| C12orf39       | XLOC_009279  | MAP1A          |
| XLOC_010385    | AP3B2        | XLOC_004636    |
| CYTH3          | SYTL3        | XLOC_010275    |
| TSPAN10        | C14orf37     | IL17RD         |
| LOC283553      | RAB11FIP1    | NTNG2          |
| XLOC_12_012678 | CYP2G1P      | KALRN          |

|                |                |                |
|----------------|----------------|----------------|
| XLOC_12_007204 | MGC50722       | LOC153577      |
| XLOC_12_010018 | XLOC_011287    | HTR3B          |
| SALL2          | XLOC_004557    | SLC26A11       |
| KLF9           | PMEL           | XLOC_013711    |
| MPP1           | SH3BP5         | OR2B6          |
| LOC100130800   | XLOC_12_014504 | ProSAPiP1      |
| XLOC_001431    | GAMT           | PAPD5          |
| CDH15          | SPON1          | XLOC_009601    |
| XLOC_12_013153 | XLOC_012021    | XLOC_12_003133 |
| XLOC_002131    | ITGA7          | GPC2           |
| XLOC_014226    | XLOC_002131    | CERCAM         |
| XLOC_12_001097 | ATP1A3         | PAGE2B         |
| RAB3A          | USH1G          | XLOC_003688    |
| XLOC_005128    | LOC100133669   | PALM3          |
| ZNF815         | BIK            | RORA           |
| BDKRB2         | SGCE           | FAM71A         |
| FTCD           | ULBP2          | FBP2           |
| METTL20        | MEI1           | GSTM2          |
| XLOC_011278    | C16orf79       | IER3           |
| DBNL           | FAM90A1        | LOC100287177   |
| XLOC_011769    | XLOC_009458    | XLOC_008652    |
| XLOC_006219    | SECTM1         | XLOC_009797    |
| XLOC_009948    | XLOC_000478    | CBX4           |
| CCK            | CPLX3          | XLOC_12_011043 |
| CYP2U1         | PI4KAP1        | SLC4A11        |
| SCHIP1         | EFR3B          | HEXIM1         |
| LOC100169752   | KLF4           | RNASE1         |
| ARAP3          | LOC100131551   | LOC100133669   |
| SERPINC1       | ATAD3C         | XLOC_002961    |
| PBX4           | BCORL1         | XLOC_003854    |
| NDRG4          | CYP2E1         | SPAM1          |
| KLHDC8B        | AOC3           | TCAP           |
| FBXO27         | RASAL1         | LOC100131829   |
| XLOC_12_002171 | CAMTA1         | IGSF9          |
| NHSL2          | FLT3LG         | LOC100507959   |
| XLOC_12_003974 | XLOC_013702    | IRF1           |
| XLOC_12_003133 | NOTCH3         | CSF2           |
| LOC151657      | PTGDS          | KCNK7          |
| LRFN1          | PDLIM7         | SHANK3         |
| C14orf49       | LGI4           | PTGES          |
| LOC100129119   | GPC2           | FAM69B         |
| KIF21B         | MDGA2          | XLOC_005101    |
| AKD1           | SAMD14         | NFE2           |
| TIGD3          | SPEG           | XLOC_010542    |
| COL5A3         | XLOC_003820    | XLOC_12_000033 |
| SPHKAP         | P2RY12         | CDH15          |
| XLOC_007884    | LRRC15         | LTB            |
| AHNAK2         | LOC648149      | SLC25A41       |



|                |                |                |
|----------------|----------------|----------------|
| PPM1J          | LINC00312      | LRFN1          |
| XLOC_000035    | LOC100131796   | LOC100506124   |
| XLOC_006892    | BBC3           | ABTB2          |
| KC6            | PGLYRP1        | TNNC1          |
| XLOC_010200    | LOC100505573   | XLOC_12_010056 |
| CFD            | XLOC_010945    | CADM4          |
| GPR37L1        | LOC647012      | TNFRSF9        |
| PDGFRL         | MSX2P1         | MYBPHL         |
| NFE2           | TNNC1          | C19orf51       |
| SOCS3          | XLOC_006240    | IER5           |
| TMEM229A       | XLOC_002872    | PLCD1          |
| DHDH           | XLOC_12_001826 | ACSBG1         |
| GJA3           | IL1RAPL2       | HSPA2          |
| LOC643723      | EVI5L          | XLOC_12_008667 |
| OR2C3          | UBTD1          | METTL20        |
| RTN2           | DUSP5P         | GNG3           |
| XLOC_003729    | C3orf20        | MIOX           |
| MAP1A          | TSC22D3        | MITF           |
| LINC00051      | GPR146         | XLOC_12_012071 |
| CILP2          | SMPD1          | TMCO2          |
| KRTAP1-3       | PIEZO2         | LOC340335      |
| XLOC_009810    | LOC100505576   | LOC100505566   |
| NKX2-1-AS1     | NDRG4          | OR4C46         |
| OSBPL6         | CCDC164        | C10orf129      |
| OR4N2          | TIMP2          | LOC400680      |
| TUBB3          | LIPI           | XLOC_006721    |
| RDH12          | XLOC_12_005690 | XLOC_12_010226 |
| SHANK3         | JAK3           | RELB           |
| XLOC_013960    | LRFN1          | LOC100505576   |
| XLOC_011513    | XLOC_009782    | XLOC_002356    |
| XLOC_009682    | GOLGA6L6       | POU3F3         |
| PEG3           | XLOC_014336    | SLC2A5         |
| HIPK4          | LOC400927      | RNF24          |
| XLOC_010924    | KIAA1467       | LOC100510007   |
| XLOC_009880    | LOC388242      | XLOC_014349    |
| XLOC_007971    | AIM2           | MCART6         |
| SH2B2          | MSX1           | XLOC_011278    |
| NPW            | RASA4          | ABCG1          |
| PPP4R4         | PCK1           | VKORC1         |
| XLOC_003130    | VWA5B2         | LINC00312      |
| SPINK2         | ASAP3          | XLOC_12_004631 |
| PLA2G2F        | GRK4           | XLOC_013535    |
| XLOC_010434    | MEF2C          | SAMD14         |
| OTUD7A         | SORBS1         | OSTBETA        |
| XLOC_12_001037 | XLOC_12_000804 | HSD17B3        |
| PLXDC1         | LOC100131581   | IQCJ-SCHIP1    |
| XLOC_010542    | MFNG           | XLOC_009269    |
| ACSBG1         | LOC100130157   | C1orf170       |

|                |                |                |
|----------------|----------------|----------------|
| XLOC_12_015239 | CDKN1C         | MAPRE3         |
| ITIH4          | C20orf160      | MAP3K14        |
| UCN2           | S1PR2          | CDR2L          |
| LOC440970      | PDGFRL         | CCDC89         |
| CDKN1C         | KRT80          | BCL3           |
| GNAZ           | LOC100652843   | POU5F2         |
| CCDC89         | LMCD1          | SGCE           |
| CYP2C19        | XLOC_014219    | LOC100652843   |
| LOC388588      | ABTB2          | GCGR           |
| XLOC_008833    | XLOC_005910    | DLX1           |
| XLOC_009094    | RPS6KA2        | XLOC_002840    |
| XLOC_002650    | CEACAM22P      | XLOC_008244    |
| CSRP2          | XLOC_013549    | XLOC_014333    |
| BAI2           | CRYGB          | RHEBL1         |
| LDHD           | XLOC_008729    | LOC100507308   |
| LOC100506777   | FNDC4          | SLC29A4        |
| OR2B6          | XLOC_006150    | GRASP          |
| CYP2G1P        | XLOC_003291    | PRKCG          |
| PAR1           | SYNGR3         | DKFZP434K028   |
| GPSM1          | XLOC_12_006944 | ATAD3C         |
| ADORA2A        | SIRPB1         | LOC100128651   |
| SESN3          | AASS           | LOC646999      |
| PLAC9          | RAB36          | XLOC_12_012942 |
| SOX2           | LOC441268      | HMSD           |
| ARL4D          | PLIN4          | LOC100288911   |
| WDR96          | BAIAP2         | CYR61          |
| IL17RD         | TLR5           | C14orf49       |
| XLOC_004256    | ABHD8          | XLOC_12_014219 |
| LOC100653007   | SEMA4D         | FOXJ1          |
| LOC283403      | ZSWIM6         | XLOC_12_007070 |
| XLOC_006779    | LOC388588      | CCDC164        |
| FBXL16         | XLOC_003210    | BCORL1         |
| CNN1           | SLC29A4        | XLOC_010634    |
| TSHZ2          | CNNM4          | LOC100506384   |
| CD48           | XLOC_001852    | SPDYA          |
| FCHO1          | XLOC_011284    | CCR7           |
| LINC00319      | IL11RA         | HPD            |
| OR56A5         | EGR2           | XLOC_007189    |
| CCL20          | XLOC_12_012847 | RYR2           |
| XLOC_001497    | DKFZp451A211   | XLOC_013559    |
| C12orf74       | LINC00163      | PRDM1          |
| MFAP3L         | XLOC_002223    | LOC731779      |
| XLOC_005101    | SOAT1          | XLOC_010891    |
| CCDC164        | POU2F2         | XLOC_006933    |
| FBXO44         | XLOC_012288    | DBP            |
| PMEL           | SLC4A11        | XLOC_002872    |
| XLOC_009458    | PNOC           | LOC100131355   |
| DFNB31         | C8orf60        | ABLIM2         |

|                |              |                |
|----------------|--------------|----------------|
| LEMD1          | AMICA1       | LOC100507109   |
| TRPV6          | GATSL3       | SH2B3          |
| NKD2           | RNASE1       | SOX2           |
| XLOC_014105    | CRYM         | EGFL7          |
| XLOC_002588    | C4orf47      | FLJ36848       |
| FAM182A        | XLOC_002650  | XLOC_001713    |
| XLOC_006043    | CROCCP3      | EFEMP2         |
| LMTK3          | PLA2G4D      | ERO1LB         |
| MEOX2          | RFPL2        | XLOC_12_015239 |
| GNG8           | LOC100288911 | XLOC_12_011309 |
| RRAD           | XLOC_000614  | NFKB2          |
| BAIAP3         | FOS          | ZNF345         |
| DKFZP434L187   | LOC440993    | DHDH           |
| XLOC_011319    | XLOC_002515  | PURG           |
| SLC25A42       | CARD14       | FLT3LG         |
| ADRA2B         | RORA         | RHBG           |
| LINC00472      | COMP         | MAMSTR         |
| PDE2A          | SEC14L4      | XLOC_010279    |
| NUP210L        | XLOC_011559  | XLOC_003910    |
| CCR10          | HPX          | ARHGAP30       |
| KIAA1751       | TRIM61       | MSX2P1         |
| XLOC_002612    | SPTB         | LOC100653515   |
| MANSC4         | RBMY2FP      | PCK1           |
| SNORD114-23    | MITF         | LOC283403      |
| DYRK3          | TTC25        | HIPK4          |
| ABLIM2         | LOC285147    | NACAD          |
| GAMT           | UCN2         | XLOC_001286    |
| GSTM2          | TBC1D10C     | SECTM1         |
| XLOC_007676    | XLOC_006918  | LOC100288432   |
| XLOC_010084    | PPP2R5B      | RNU11          |
| XLOC_013743    | FLYWCH1      | DUSP5P         |
| DLX2           | CDKN2B       | ARAP3          |
| XLOC_008251    | MUC21        | XLOC_004557    |
| XLOC_12_012605 | LOC339442    | MAN1C1         |
| CALB1          | LOC100507959 | EXOC3L4        |
| FHAD1          | SERPINF1     | DUSP1          |
| OGDHL          | SLC30A2      | FBXL16         |
| PRSS41         | LOC100652728 | XLOC_011722    |
| LOC100507959   | PGR          | XLOC_000980    |
| XLOC_009100    | LOC100506688 | SYNGR3         |
| SLC45A1        | CITED4       | TMEM229A       |
| DPF1           | BATF3        | MFAP3L         |
| PADI3          | C9orf171     | SCN3B          |
| ENPEP          | RASIP1       | GPR146         |
| LOC157562      | KIF6         | XLOC_009196    |
| REEP2          | ARID3B       | MPP1           |
| C2orf173       | XLOC_013559  | SPTSSB         |
| XLOC_001345    | FLJ26086     | LOC388588      |

|                |              |                |
|----------------|--------------|----------------|
| SCN2A          | FBXO44       | LRRC3          |
| XLOC_011359    | DIO1         | C17orf98       |
| CPT1C          | FBP2         | XLOC_001816    |
| LOC100506837   | PHACTR3      | XLOC_001523    |
| XLOC_009258    | FBXO27       | LRP4           |
| ZNF204P        | JAKMIP2      | LOC151657      |
| PTPRU          | XLOC_013583  | PTPRU          |
| PTGDS          | PIM1         | PLEKHF1        |
| XLOC_005935    | GGT8P        | SH2D5          |
| HEG1           | XLOC_002296  | XLOC_001512    |
| XLOC_013711    | EIF5A2       | PIEZO2         |
| XLOC_012169    | LOC100508950 | GATSL3         |
| LOC100132354   | C1orf201     | EPOR           |
| XLOC_005763    | PTGS1        | OPRK1          |
| LRRC3          | LPHN1        | GPX6           |
| BRSK2          | LOC284412    | ZNF114         |
| P2RX7          | DENND2C      | ZNF204P        |
| LOC100131366   | XLOC_003937  | FAM46C         |
| HSPA12A        | TUFT1        | LOC606724      |
| COL7A1         | LRRC7        | RCOR2          |
| SLC27A1        | ST3GAL5      | ASB15          |
| ABAT           | SPOCK2       | RDH12          |
| SECTM1         | XLOC_002485  | HIST1H1T       |
| LOC439950      | GNAZ         | ALDH8A1        |
| XLOC_12_013427 | PREX1        | NDRG4          |
| XLOC_003176    | KANK3        | FUT7           |
| ZNF883         | AKT3         | LOC284939      |
| CETN1          | IL21R        | HEG1           |
| KIRREL2        | TDRD1        | SSC5D          |
| XLOC_005535    | FBXL16       | CXorf22        |
| ZNF114         | CFD          | DYRK3          |
| TNFRSF10C      | RAB6B        | LOC728228      |
| XLOC_009797    | SNORD114-6   | BEST1          |
| PACSIN3        | PPP1R14C     | XLOC_008959    |
| ASPHD2         | PCYOX1L      | BBC3           |
| CD7            | PTGES        | XLOC_010148    |
| POLN           | PTGIR        | PPP2R5B        |
| LOC100508950   | CHKA         | GPR155         |
| SYNPR          | LOC100287415 | SPIB           |
| LOC100507930   | XLOC_011178  | IL32           |
| UAP1L1         | CDR2L        | SCARA5         |
| TNFRSF1B       | KRT16P2      | XLOC_010057    |
| LOC646999      | DDIT4        | XLOC_12_012847 |
| CLEC4E         | GPR111       | ADORA2A        |
| XLOC_010989    | ELFN2        | XLOC_009706    |
| CALHM2         | LINC00485    | XLOC_000101    |
| XLOC_005621    | ABCB9        | DFNB31         |
| XLOC_010293    | SCHIP1       | PEAR1          |

|                |                |                |
|----------------|----------------|----------------|
| GPR20          | NAP1L5         | LOC283404      |
| C1orf130       | LOC100131492   | XLOC_011359    |
| WDR66          | LOC100507278   | XLOC_004120    |
| XLOC_012343    | SLC1A4         | XLOC_011513    |
| SIT1           | GRAMD1A        | ST3GAL5        |
| CLTCL1         | METTL20        | XLOC_013052    |
| SEMA7A         | IQCJ-SCHIP1    | XLOC_006756    |
| SLC10A7        | ENPP5          | S1PR2          |
| KCNQ1OT1       | ProSAPiP1      | CCDC28B        |
| CORO1A         | CPT1C          | MICALCL        |
| TBXA2R         | RCOR2          | REEP2          |
| GNG4           | XLOC_12_008252 | XLOC_006951    |
| FNDC5          | sept-03        | KLHL29         |
| LOC100652965   | LOC285456      | XLOC_12_007876 |
| LRP4           | ATG9B          | CYP2E1         |
| XLOC_008611    | SLC9A1         | XLOC_12_013162 |
| HAPLN3         | HTR2C          | COL18A1-AS1    |
| RGS11          | C8orf31        | PI4KA          |
| CYP2C9         | ICAM5          | LOC729040      |
| C17orf99       | XLOC_12_003627 | SLC45A1        |
| CES1P1         | XLOC_012343    | XLOC_009682    |
| HS6ST3         | ARID5A         | KLF4           |
| XLOC_011136    | MME            | ZNF605         |
| SERPINB9       | CDON           | XLOC_010434    |
| XLOC_009684    | XYLT1          | SV2B           |
| LINC00087      | LOC100507131   | XLOC_008466    |
| GPR155         | LINC00051      | ITGA7          |
| XLOC_12_009332 | OLAH           | FBXO27         |
| TMCC2          | TAS1R3         | LOC388242      |
| sept-06        | ARHGEF4        | LOC100506068   |
| TEX19          | DUSP1          | XLOC_12_002709 |
| LOC253962      | XLOC_12_004631 | XLOC_014110    |
| LOC100131066   | SYT2           | XLOC_12_001652 |
| LOC284570      | LOC100652839   | C3             |
| TNFRSF18       | LOC100506030   | SDC4           |
| KRT12          | PTAFR          | LOC100287651   |
| OTOR           | MED14          | XLOC_007850    |
| SNAI3          | XLOC_007218    | PDZD7          |
| ETNK2          | XLOC_12_011921 | FGF16          |
| SRCIN1         | FLJ40453       | XLOC_001698    |
| LYPD5          | LOC152586      | FNDC4          |
| TMEM151B       | CCDC89         | LILRA6         |
| RASGRP2        | APOE           | XLOC_014336    |
| STAB1          | EXT1           | XLOC_12_009140 |
| LOC100507039   | RBM44          | XLOC_12_010880 |
| SMARCD3        | XLOC_003199    | LOC100505869   |
| SCN4B          | MYZAP          | SLC6A13        |
| RAB3IL1        | DBP            | DBNL           |

|                |                |                |
|----------------|----------------|----------------|
| RHOV           | SH3PXD2B       | XLOC_12_007204 |
| SIRT4          | TSHZ2          | CILP2          |
| CAMK2N2        | XLOC_003508    | ACTA1          |
| ZCCHC24        | SNTA1          | POFUT1         |
| XLOC_12_011302 | MGC23284       | XLOC_005927    |
| SCAMP5         | CYP2U1         | XLOC_013356    |
| XLOC_004978    | C17orf99       | KIAA1683       |
| GP1BB          | RFPL3-AS1      | XLOC_12_012984 |
| SPEF1          | COLEC11        | OGDHL          |
| NEURL3         | EGFL7          | SELM           |
| LOC100507162   | XLOC_009252    | XLOC_12_011508 |
| OLFML2A        | XLOC_007191    | LOC200609      |
| XLOC_12_007070 | ASB2           | XLOC_011006    |
| NOD2           | HIC1           | LOC100652839   |
| XLOC_007598    | XLOC_12_014191 | CYTH3          |
| XLOC_011348    | LOC100508287   | C8orf60        |
| XLOC_12_000735 | CCR10          | OR4Q3          |
| SNAI1          | XLOC_000446    | FXYD4          |
| POU4F1         | XLOC_12_015673 | SCHIP1         |
| CCDC151        | SLC25A34       | C20orf79       |
| CTAG1A         | FTCD           | XLOC_003838    |
| XLOC_008370    | BIRC3          | IL11           |
| ELOVL3         | CNN1           | PTGDS          |
| XLOC_013939    | TNF            | TBC1D10C       |
| GATA5          | GPC6           | LOC100506348   |
| WDR69          | LOC401134      | CCK            |
| ESPNL          | FOXD3          | OLFML2A        |
| IL5            | LEUTX          | XLOC_001624    |
| DUSP27         | AKAP2          | XLOC_005434    |
| TMEM169        | CLGN           | HES4           |
| RNF112         | XLOC_011348    | XLOC_12_006578 |
| EDN2           | CILP2          | XLOC_010240    |
| SGCE           | CPEB4          | C20orf195      |
| GEM            | LOC254896      | XLOC_002650    |
| LOC100505651   | KCNJ5          | TMC8           |
| LOC440330      | XLOC_002079    | CNN1           |
| XLOC_009622    | PGF            | WDR69          |
| USP2           | STRC           | XLOC_002821    |
| ANKRD35        | KCNJ18         | FLJ40852       |
| ANKRD34A       | LOC728228      | TUBB3          |
| EFNA3          | XLOC_002514    | EBF3           |
| CHST6          | FAM46C         | XLOC_12_003674 |
| PRSS50         | XLOC_002821    | TTY15          |
| FBP2           | GPR37L1        | VSTM2A         |
| SERTM1         | SYT11          | CPT1C          |
| SCN3B          | XLOC_001485    | AHNAK2         |
| PP14571        | TMEM200B       | C14orf23       |
| XLOC_008731    | CTAG1A         | ITIH4          |

|                |                |                |
|----------------|----------------|----------------|
| XLOC_010743    | NRG2           | XLOC_003541    |
| SYT12          | PEG10          | XLOC_010989    |
| GPRC5B         | TMEM158        | GATA5          |
| SUSD3          | GNG8           | XLOC_12_000297 |
| LOC100507002   | XLOC_009880    | LOC100128185   |
| TMOD2          | CALCR          | ETNK2          |
| STOM           | XLOC_011359    | XLOC_008540    |
| SLC6A12        | LOC100506153   | LINC00461      |
| VASN           | KRT83          | RNU4ATAC       |
| PEG10          | TPST1          | SH2B2          |
| XLOC_006495    | XLOC_007598    | XLOC_12_009332 |
| APC2           | STMN4          | CDKN2B         |
| SLC19A3        | MAPRE3         | WISP1          |
| IL1B           | HBEGF          | LYPD5          |
| XLOC_12_000116 | XLOC_12_000018 | LOC254896      |
| NRTN           | XLOC_006951    | XLOC_010829    |
| IFITM10        | XLOC_010989    | EDDM3B         |
| LOC100288175   | CD7            | P2RX7          |
| KLK7           | FXVD4          | GAMT           |
| XLOC_12_011908 | PDE4A          | LOC100506034   |
| CD19           | XLOC_005633    | ARID5A         |
| MLXIPL         | XLOC_009024    | VAMP1          |
| LYL1           | LOC283404      | XLOC_006150    |
| PRPH           | PPP1R14D       | XLOC_012209    |
| GADD45B        | XLOC_013535    | XLOC_001305    |
| BMPR1B         | PER1           | STGC3          |
| CTRC           | CCDC102B       | SLC25A42       |
| XLOC_12_014217 | XLOC_002059    | TBXA2R         |
| ADRB2          | CMTM2          | XLOC_12_000233 |
| ATP1B2         | DNAH12         | HIST2H2BF      |
| KIAA0513       | LRP4           | LMTK3          |
| LYPD3          | TMEM86A        | INSM2          |
| PPFIA4         | CACNB4         | SAA2           |
| SCARF2         | XLOC_12_012942 | XLOC_12_007731 |
| XLOC_12_009929 | BAIAP3         | BIK            |
| VWCE           | KIAA1524       | APOE           |
| LRRC10B        | TRIM43         | IL1A           |
| PIP5KL1        | ABCA3          | RNU6ATAC       |
| XLOC_012622    | SHC2           | XLOC_013558    |
| MAP3K12        | XLOC_12_013564 | BMF            |
| HYAL1          | GNG4           | TIGD3          |
| CATSPERB       | RCAN2          | FHAD1          |
| DLK2           | IL17RD         | CYP2C9         |
| VPS37D         | XLOC_009147    | XLOC_009487    |
| LOC283674      | LOC100505827   | ASB2           |
| SYNPO          | LPHN2          | XLOC_009887    |
| XLOC_000254    | GP6            | GNAZ           |
| RAB42          | XLOC_000695    | XLOC_12_000018 |

|                |                |                |
|----------------|----------------|----------------|
| ANKRD62        | TMEM25         | ENTPD8         |
| RASL10A        | MFAP3L         | SYT1           |
| LGALS1         | DLX3           | NFKBIE         |
| C11orf86       | LOC100131355   | OR51I1         |
| C9orf169       | LOC400548      | CERS1          |
| HRH4           | XLOC_001988    | PPM1J          |
| SYT11          | XLOC_008165    | BAI2           |
| TMEM151A       | ZNF391         | PER1           |
| SERPINI1       | LOC157562      | DZIP1          |
| IL10RA         | DUSP10         | ARL4C          |
| ICAM4          | LOC100653007   | PRRT2          |
| C17orf72       | RTN2           | VAV1           |
| C1QL4          | XLOC_005663    | LOC157562      |
| RGL1           | TRIM48         | KLF9           |
| JSRP1          | FOSB           | S1PR4          |
| TNFSF9         | XLOC_006495    | ADAMTS4        |
| NXPH4          | HAS3           | CTAG1A         |
| ZMYND10        | LOC100289650   | XLOC_004423    |
| XLOC_004244    | XLOC_008246    | RAB3A          |
| PLK5           | ZNF114         | LOC100507930   |
| LOC643037      | ABLIM2         | KCNH5          |
| HES7           | DLX1           | XLOC_002688    |
| NR4A3          | PLA2G2F        | ICAM5          |
| KLC3           | GDPD3          | XLOC_010243    |
| TDRD6          | PRDM1          | XLOC_012105    |
| NAT8L          | LMTK3          | XLOC_010306    |
| CEACAM22P      | XLOC_005782    | XLOC_012899    |
| PLIN5          | XLOC_010275    | TEX19          |
| XLOC_006813    | XLOC_12_009449 | SLC27A1        |
| COL1A1         | CBX4           | XLOC_002865    |
| XLOC_12_012552 | XLOC_000233    | CFD            |
| CHD5           | XLOC_004626    | RTN2           |
| XLOC_12_002351 | TRIM46         | XLOC_002232    |
| WBSCR28        | XLOC_012694    | CYP2C19        |
| LRRC25         | P2RX7          | ZNF404         |
| NTN5           | LOC643406      | LRRC10B        |
| PIK3CD         | C6orf81        | LOC100131366   |
| FSCN1          | DMBX1          | ADM2           |
| XLOC_000027    | ARAP3          | PMEL           |
| HOXC12         | GLIPR2         | RASGRP2        |
| FKBP1B         | XLOC_002449    | XLOC_012169    |
| FAM46B         | CERS1          | PPP4R4         |
| DHH            | SEMG2          | XLOC_12_001310 |
| CBS            | DBNL           | XLOC_013720    |
| LOC100506546   | ARHGAP30       | LOC100508950   |
| TUBB2B         | XLOC_000686    | TTN            |
| ADC            | GSTM2          | XLOC_001050    |
| DACT3          | LOC340335      | LAG3           |



|         |                |                |
|---------|----------------|----------------|
| ABCG4   | LOC339166      | FBXO44         |
| FBXO2   | PEAR1          | CLEC1A         |
| TMEM121 | CCR7           | XLOC_005529    |
| KREMEN2 | XLOC_004565    | BDKRB2         |
| CREB3L3 | DACT1          | XLOC_014226    |
| ANGPTL4 | XLOC_009864    | LGALS7         |
| CEND1   | XLOC_003709    | LOC728175      |
| SLC2A4  | CLEC4F         | C20orf194      |
| SH2D3C  | CD19           | XLOC_007701    |
|         | CALHM3         | KIRREL2        |
|         | SESN2          | ARL4D          |
|         | SH2D5          | XLOC_009367    |
|         | XLOC_12_010386 | WFIKKN1        |
|         | RAB42          | KRT86          |
|         | A2MP1          | LINC00087      |
|         | ADCY4          | XLOC_12_015766 |
|         | BMP6           | ZBTB46         |
|         | LOC283392      | POLN           |
|         | SAMD12-AS1     | CD7            |
|         | ABCG1          | XLOC_007349    |
|         | XLOC_013039    | XLOC_002534    |
|         | XLOC_004584    | XLOC_008700    |
|         | CADM4          | DUSP10         |
|         | KLK7           | ZCCHC24        |
|         | HES4           | XLOC_12_015800 |
|         | XLOC_003834    | LOC650293      |
|         | MAP1A          | TMEM151B       |
|         | DZIP1L         | OPRM1          |
|         | XLOC_007189    | XLOC_000051    |
|         | DFNB31         | SLC24A2        |
|         | XLOC_011529    | CYP2G1P        |
|         | RHBG           | SRCIN1         |
|         | RFPL4A         | FCHO1          |
|         | SH2B2          | LY6G6F         |
|         | XLOC_12_011873 | LOC100652965   |
|         | LOC100507930   | BRSK2          |
|         | XLOC_012792    | CITED4         |
|         | SLC5A8         | LOC100653007   |
|         | ABCC9          | XLOC_12_014697 |
|         | BMF            | RAB3IL1        |
|         | LAMA4          | OR14C36        |
|         | KIAA1683       | PPP1R14D       |
|         | WFIKKN1        | MOGAT1         |
|         | TMEM63C        | LOC100505634   |
|         | ADORA2A        | C3orf32        |
|         | RNF24          | XLOC_010942    |
|         | BMP8A          | XLOC_000671    |
|         | XLOC_12_002122 | XLOC_007090    |

|                |              |
|----------------|--------------|
| NGFR           | XLOC_013754  |
| XLOC_011938    | XLOC_007502  |
| RBM24          | CALB1        |
| Q29HP5         | GNG8         |
| SPEF1          | LOC400927    |
| LACRT          | LEMD1        |
| CYR61          | XLOC_000695  |
| VAV1           | GNG4         |
| LOC100507039   | XLOC_000446  |
| XLOC_12_006751 | OR5M3        |
| LRRC6          | PLA2G2F      |
| INSM2          | LOC100132354 |
| GARNL3         | XLOC_002643  |
| SELM           | SIRT4        |
| TEX19          | TRPV6        |
| OGDHL          | GPSM1        |
| ATF3           | XLOC_005372  |
| XLOC_001659    | PADI3        |
| UNC5B          | LOC100508631 |
| XLOC_006933    | XLOC_001974  |
| TOX2           | XLOC_003562  |
| SIRT4          | CLDN6        |
| RRAD           | CAMK2N2      |
| XLOC_003688    | EEF1DP3      |
| GPR155         | XLOC_008388  |
| RGS11          | GALNT13      |
| PPP4R4         | ASPHD2       |
| XLOC_12_000735 | CCR10        |
| PADI3          | ST6GALNAC3   |
| NACAD          | LILRB2       |
| XLOC_12_002351 | LINC00319    |
| MICALCL        | CSRP2        |
| GREB1L         | PTGER3       |
| MAP1LC3A       | LOC100653080 |
| LOC100506791   | RGS11        |
| GPR101         | IPW          |
| COL7A1         | XLOC_006228  |
| TBXA2R         | NFKBIA       |
| C17orf72       | XLOC_003475  |
| ZCCHC24        | XLOC_009147  |
| XLOC_014402    | TSHZ2        |
| CCDC151        | PGF          |
| PPM1J          | SLC9B1       |
| LINC00472      | LOC643962    |
| ARL4C          | OR1L4        |
| ADCY9          | GP1BB        |
| XLOC_12_012552 | TMOD2        |
| PXK            | MAP1LC3A     |

|                |                |
|----------------|----------------|
| BAI2           | LOC283547      |
| XLOC_12_015828 | AJAP1          |
| TUBB3          | XLOC_004765    |
| KCNQ1OT1       | XLOC_000181    |
| TDRD6          | CLTCL1         |
| BARX1          | PPP1R14A       |
| CRTAM          | DUSP5          |
| SRGN           | LOC100507065   |
| XLOC_12_009285 | XLOC_012866    |
| XLOC_12_013099 | XLOC_001045    |
| SHANK3         | FOXD3          |
| CYTH3          | TMEM169        |
| SNPH           | XLOC_004961    |
| LOC284570      | PPFIA4         |
| ITIH4          | PACSIN3        |
| DUSP5          | SYT11          |
| XLOC_12_013456 | USP2           |
| LOC100507162   | TNFRSF10C      |
| FAM9B          | NKD2           |
| XLOC_003338    | TMCC2          |
| AGPAT4-IT1     | NPW            |
| LOC100506731   | TRIM46         |
| LRTOMT         | XLOC_014050    |
| LYST           | LPAL2          |
| PDE2A          | PBX4           |
| MIOX           | SCN4B          |
| HS3ST4         | FSTL3          |
| FCHO1          | XLOC_012991    |
| ZNF582         | XLOC_002612    |
| C14orf49       | XLOC_12_001826 |
| SRRM3          | SCAMP5         |
| OVCH1          | TNFAIP2        |
| XLOC_011470    | RNF112         |
| LGALS14        | XLOC_12_003419 |
| ZNF204P        | BAIAP3         |
| KLHL29         | SLC22A8        |
| SNORD115-27    | DPF1           |
| IQCJ           | LRRC43         |
| TMEM212        | XLOC_12_002171 |
| LOC150185      | LOC285547      |
| XLOC_12_004318 | XLOC_12_010815 |
| XLOC_12_015220 | XLOC_12_001289 |
| HBA2           | FAM182A        |
| NEURL3         | XLOC_004429    |
| GJA3           | XLOC_012343    |
| TNFRSF10C      | XLOC_12_000116 |
| TRPV6          | XLOC_011173    |
| XLOC_12_009332 | LOC440330      |

|                |                |
|----------------|----------------|
| XLOC_12_006003 | SPEF1          |
| LOC100507228   | FGF20          |
| XLOC_002250    | GTSF1L         |
| INMT           | SMARCD3        |
| DYRK3          | HSPA12A        |
| XLOC_007188    | CCR3           |
| MYBPHL         | FCAR           |
| CAMK2N2        | XLOC_007182    |
| LOC100505851   | FAM43A         |
| CTRC           | DLX3           |
| BRSK2          | HIST1H4G       |
| WISP2          | OR6B2          |
| DSG3           | XLOC_003829    |
| GATA5          | C1orf130       |
| ESPNL          | LOC389199      |
| XLOC_005514    | LOC100507039   |
| CDH15          | XLOC_12_011728 |
| SLC6A3         | sept-06        |
| TAG            | PEG10          |
| RAB3A          | SLC6A12        |
| LOC100506022   | LOC100507002   |
| XLOC_012169    | GPRC5B         |
| PBX4           | XLOC_003825    |
| RNF112         | XLOC_007598    |
| ABAT           | XLOC_003834    |
| KLF9           | XLOC_009429    |
| C1orf130       | XLOC_009167    |
| ETNK2          | XLOC_12_007586 |
| ZBTB46         | MSX1           |
| LOC283403      | SERPINI1       |
| SCN3B          | XLOC_011348    |
| XLOC_008611    | XLOC_009813    |
| CYCSP52        | ANKRD35        |
| XLOC_005774    | SRPX           |
| PP14571        | KRT12          |
| XLOC_12_010549 | LOC100507162   |
| HAPLN3         | Q81CU5         |
| RASGRP2        | PP14571        |
| CATSPERB       | XLOC_005088    |
| LINC00087      | XLOC_003544    |
| XLOC_012114    | C17orf72       |
| TAGAP          | CD19           |
| KRT12          | NCRNA00185     |
| NPW            | OR5P2          |
| CSRP2          | XLOC_001354    |
| LOC728218      | XLOC_005047    |
| SH2B3          | CLEC4G         |
| LOC400541      | HAPLN3         |

|                |                |
|----------------|----------------|
| ADM2           | CHST6          |
| GPR26          | HIST1H4A       |
| IL9            | ELOVL3         |
| XLOC_014104    | TNFRSF18       |
| LOC100128905   | SLC19A3        |
| CERCAM         | GFAP           |
| PACSIN3        | XLOC_014188    |
| ARC            | XLOC_001826    |
| C20orf103      | ANKRD34A       |
| SLC38A4        | ADRA2B         |
| XLOC_009167    | SOX14          |
| FLJ32756       | XLOC_012665    |
| PPFIA4         | EFNA3          |
| VWCE           | XLOC_12_014757 |
| LOC100505890   | XLOC_002560    |
| DAO            | FOSB           |
| LRRC10B        | XLOC_013614    |
| LOC100505869   | SERPINB9       |
| FGF21          | BARHL2         |
| KRT42P         | XLOC_010897    |
| CXCL14         | SUSD3          |
| OLFML2A        | CYS1           |
| XLOC_12_014245 | LOC283674      |
| STOM           | XLOC_014410    |
| SERPINE1       | KRTAP4-9       |
| C10orf113      | XLOC_002252    |
| IL11           | SYT12          |
| MPP1           | LOC100506835   |
| ICAM4          | UAP1L1         |
| ADRA2B         | XLOC_001989    |
| CCR1           | NCKAP5         |
| TRPM6          | XLOC_005034    |
| ATP1B2         | CDKN1C         |
| ANKRD34A       | DSC3           |
| C13orf35       | IL10RA         |
| SLC25A42       | XLOC_001504    |
| CYP26C1        | PDE2A          |
| GNG2           | EML1           |
| DNM1P46        | XLOC_005808    |
| XLOC_010243    | GPR20          |
| RND1           | CDKN1A         |
| HSPA12A        | PRPH           |
| OR5M3          | SNAI3          |
| XLOC_008766    | GNG2           |
| GPRC5B         | CXCL6          |
| XLOC_003547    | XLOC_012592    |
| DDIT3          | LOC100132147   |
| WDR69          | XLOC_12_010947 |

|                |                |
|----------------|----------------|
| KRT86          | XLOC_005774    |
| IL1A           | ESPNL          |
| XLOC_012840    | SEMA7A         |
| XLOC_002841    | XLOC_009684    |
| XLOC_014226    | SCARF2         |
| LOC100506662   | PPP1R27        |
| SPINK2         | FLJ37035       |
| SPAG11B        | HDAC9          |
| HS3ST6         | LOC100506397   |
| sept-06        | C7orf58        |
| LOC100505679   | XLOC_004238    |
| XLOC_012904    | DPF3           |
| XLOC_009601    | CATSPERB       |
| SNORD64        | XLOC_012727    |
| WNT5B          | CCDC151        |
| FHAD1          | C1QL4          |
| XLOC_12_004556 | XLOC_000424    |
| RDH12          | XLOC_000889    |
| SNAI3          | CACNA1B        |
| XLOC_010307    | NFATC1         |
| MUC19          | SRRM3          |
| SCARF2         | XLOC_006664    |
| SYT12          | CCR1           |
| XLOC_002643    | NTNG1          |
| LOC645434      | CORO1A         |
| ARL4D          | XLOC_12_009492 |
| XLOC_010556    | KCNQ10T1       |
| TNFRSF18       | PDE7B          |
| C14orf183      | MAGI2-IT1      |
| LOC100507429   | ARMC4          |
| DPF1           | CSF3           |
| XLOC_12_011908 | UCN2           |
| XLOC_12_000116 | RND1           |
| LRTM1          | ABAT           |
| C3orf32        | XLOC_12_000735 |
| CHD5           | LOC116437      |
| CLTCL1         | YSK4           |
| GRIA2          | LOC643037      |
| CRH            | XLOC_12_015121 |
| FAM43A         | MAB21L1        |
| OR4C12         | CAGE1          |
| AHNAK2         | LYL1           |
| SLC22A24       | POMC           |
| XLOC_006326    | LOC100287036   |
| DLX2           | XLOC_013448    |
| PTPRU          | LOC100508227   |
| NLRP8          | XLOC_010031    |
| RHOV           | XLOC_005465    |

|                |                |
|----------------|----------------|
| SUSD3          | STOM           |
| CYP27C1        | MARCO          |
| LYL1           | IGSF5          |
| LINC00319      | XLOC_002859    |
| ANKRD35        | APC2           |
| LINC00310      | GABRA6         |
| RGS6           | GPR37L1        |
| CORO1A         | XLOC_009361    |
| XLOC_12_011218 | PHOX2A         |
| XLOC_008260    | XLOC_004490    |
| TMCC2          | XLOC_008611    |
| OSBPL6         | KLK7           |
| XLOC_12_000514 | MLXIPL         |
| DLK2           | CSPG4P1Y       |
| XLOC_008208    | C17orf99       |
| KRT14          | XLOC_004044    |
| LOC283674      | ABCA8          |
| REEP2          | LOC647107      |
| CYTH4          | XLOC_12_011656 |
| FBN2           | EDN2           |
| LYPD5          | XLOC_12_000941 |
| XLOC_12_008991 | LOC100287704   |
| PIP5KL1        | XLOC_003820    |
| TMOD2          | NXPH4          |
| XLOC_007437    | MAT1A          |
| LOC153910      | XLOC_008535    |
| RASL10A        | XLOC_008832    |
| UAP1L1         | TNFRSF4        |
| EFNA3          | KIAA0513       |
| HCRTR1         | MATN4          |
| APC2           | VPS37D         |
| GP1BB          | COL7A1         |
| XLOC_12_009363 | NRTN           |
| SLC45A1        | PDE1C          |
| FP588          | XLOC_006495    |
| XLOC_006106    | DLX2           |
| TFCP2L1        | ARC            |
| RGL1           | XLOC_010743    |
| CLDN10         | IFITM10        |
| LOC100129125   | ATP1B2         |
| MYH8           | PIP5KL1        |
| PRPH           | GADD45B        |
| VASN           | DLK2           |
| XLOC_12_015039 | OR1F1          |
| DHDH           | NAT8L          |
| NRTN           | CR2            |
| XLOC_004761    | ZNF582         |
| C11orf86       | XLOC_004073    |

|                |                |
|----------------|----------------|
| SERPINB9       | XLOC_007407    |
| XLOC_12_006021 | LOC284570      |
| CTRB1          | MAP3K12        |
| XLOC_000403    | XLOC_004264    |
| XLOC_008693    | HES7           |
| TMEM151A       | VASN           |
| ZMYND10        | ABCC9          |
| LOC100129662   | RAB42          |
| FAM75D3        | XLOC_008600    |
| CHST6          | TMEM151A       |
| SLC2A7         | LTBP2          |
| XLOC_12_007452 | ADD2           |
| USP2           | XLOC_001070    |
| TTC23L         | LOC100288175   |
| TMEM169        | HYAL1          |
| GEM            | XLOC_12_012552 |
| SOCS3          | CXCL3          |
| HYAL1          | XLOC_12_001548 |
| XLOC_013240    | CTRC           |
| FKBP1B         | SYNPO          |
| SCAMP5         | ADRB2          |
| ELOVL3         | GEM            |
| KRT17          | CEACAM22P      |
| GADD45B        | LOC100288568   |
| NAT8L          | MICB           |
| NFE2L2         | ICAM1          |
| LOC339568      | XLOC_009473    |
| SERPINI1       | LOC283501      |
| ULBP1          | XRCC5          |
| SLC19A3        | XLOC_008358    |
| LOC100507002   | LOC100128787   |
| XLOC_005667    | KLF7           |
| RAB3IL1        | LOC100506853   |
| XLOC_014412    | RHOV           |
| IFITM10        | TDRD6          |
| XLOC_003882    | XLOC_004244    |
| XLOC_000971    | LOC152274      |
| C12orf69       | SOCS3          |
| CDKN1A         | RD3            |
| XLOC_12_010458 | ZMYND10        |
| XLOC_006870    | CPEB1          |
| SYNPO          | XLOC_000492    |
| XLOC_010934    | FKBP1B         |
| LGALS1         | P4HA3          |
| FBXO2          | XLOC_000950    |
| ASPHD2         | LGALS1         |
| FREM3          | VWCE           |
| LOC283481      | CNRIP1         |



|                |                |
|----------------|----------------|
| XLOC_12_013859 | C6orf168       |
| XLOC_12_010855 | PLK5           |
| MAP3K12        | LRRC9          |
| OR8I2          | SAMSN1         |
| XLOC_005791    | RASL10A        |
| LOC100288175   | KRT5           |
| SLC3A1         | SNAI1          |
| CCK            | XLOC_12_011908 |
| C9orf169       | CD28           |
| XLOC_004397    | IL4I1          |
| HEG1           | NR4A3          |
| PRSS33         | WBSCR28        |
| XLOC_006890    | ZBTB8B         |
| XLOC_12_015520 | SPINLW1-WFDC6  |
| XLOC_012048    | RGL1           |
| SRCIN1         | XLOC_001964    |
| LYPD3          | LOC100508177   |
| XLOC_008601    | COL1A1         |
| MGC27382       | NTN5           |
| GPR20          | FGF5           |
| LOC375295      | XLOC_007000    |
| EDN2           | LYPD3          |
| MLXIPL         | XLOC_010254    |
| TSPY2          | IL2RB          |
| VPS37D         | LOC728763      |
| XLOC_12_010601 | BIRC3          |
| HES7           | KLC3           |
| CD101          | LRRC25         |
| LOC100128098   | TNFSF9         |
| TMEM200A       | SCGB2A2        |
| LINC00486      | DLX6           |
| XLOC_004244    | HLA-DQA1       |
| XLOC_005643    | XLOC_000027    |
| KIAA0513       | XLOC_007966    |
| XLOC_006580    | C11orf86       |
| XLOC_12_010835 | TNFAIP3        |
| C1orf61        | PLIN5          |
| SIAH3          | FAM46B         |
| XLOC_12_004385 | XLOC_12_002351 |
| BDKRB2         | CBS            |
| XLOC_005915    | C9orf169       |
| XLOC_12_015322 | NEURL3         |
| TNFSF9         | FSCN1          |
| XLOC_12_006013 | HOXC12         |
| XLOC_010148    | DHH            |
| HOXC12         | ABCG4          |
| XLOC_002707    | XLOC_004693    |
| SMARCD3        | ADC            |

|                |              |
|----------------|--------------|
| NXPH4          | TUBB2B       |
| XLOC_001881    | IL1B         |
| DHH            | CXCL2        |
| LOC339400      | JSRP1        |
| SCN4B          | DACT3        |
| SNAI1          | LOC100506546 |
| XLOC_005808    | ICAM4        |
| XLOC_005454    | IL17C        |
| IL1B           | RRAD         |
| GPR141         | FBXO2        |
| XLOC_014220    | CXCL1        |
| NTN5           | SLC2A4       |
| PLIN5          | TMEM121      |
| CHAC1          | KREMEN2      |
| WBSCR28        | CREB3L3      |
| LRRC25         | ANGPTL4      |
| XLOC_12_013741 | CEND1        |
| BEST1          | TNF          |
| XLOC_014001    | SH2D3C       |
| TUBB2B         | CCL20        |
| XLOC_006213    |              |
| LOC285626      |              |
| XLOC_005008    |              |
| MICB           |              |
| LOC643037      |              |
| FAM46B         |              |
| C1QL4          |              |
| SLC35F1        |              |
| JSRP1          |              |
| KLC3           |              |
| CBS            |              |
| PLK5           |              |
| LOC731779      |              |
| NR4A3          |              |
| TMEM121        |              |
| FSCN1          |              |
| LOC100506546   |              |
| XLOC_000027    |              |
| KREMEN2        |              |
| ADRB2          |              |
| COL1A1         |              |
| IL10RA         |              |
| ADC            |              |
| ABCG4          |              |
| SLC2A4         |              |
| SEMA7A         |              |
| DACT3          |              |
| CEND1          |              |

|  |                                        |  |
|--|----------------------------------------|--|
|  | ANGPTL4<br>CREB3L3<br>CYP1A1<br>SH2D3C |  |
|--|----------------------------------------|--|

**TRAIL+SN (n=3313)**

ZNF75A  
RRP9  
NBPF10  
SMAP2  
MAD1L1  
IL10RB  
SPDYE2  
SNHG5  
MEF2D  
TGFBI  
STRN  
TCP1  
SNORD71  
KIF13B  
SLC3A2  
DBN1  
LOC100506720  
XLOC\_008781  
TRAFD1  
ZNF295  
HOXB13  
FBXW7  
FAM69A  
EPN2  
ZCCHC11  
ATP2A1  
FAM179B  
PVT1  
KIAA1609  
XLOC\_008015  
PNMA1  
XPR1  
LOC399900  
AQP7P3  
DYNLT1  
HAUS6  
SOX13  
GSTT2  
C9orf116  
KIAA0895L  
PI4KA  
TNNC2  
STK11  
GALK1

KLC2  
ACSL3  
XLOC\_12\_006404  
LOC285141  
XLOC\_013181  
ARGFXP2  
CHD4  
MC1R  
DNAJB2  
NEK1  
MAPK8  
ZMIZ1  
CXorf40B  
SCARNA14  
CEP68  
C1orf55  
NEDD4L  
XLOC\_013914  
LOC100507672  
SEPP1  
DDHD2  
XLOC\_006124  
TMEM104  
SAR1A  
FAM91A1  
TCFL5  
CNST  
NT5C2  
RPL28  
XLOC\_12\_008140  
RAB43  
ANKRD13C  
XLOC\_12\_010097  
FBXO3  
DHX16  
CHRM4  
ARHGAP33  
XLOC\_000166  
USP20  
PER2  
UBE2I  
ARPC4-TTLL3  
ZBTB47  
CRABP2  
PLIN2  
INPP5F  
FBXL20  
CCDC165

SLC26A6  
LAMB1  
LOC100506127  
XLOC\_12\_004640  
FA2H  
SLC25A28  
SLC6A8  
SEC31B  
ACOX1  
SEC14L2  
PTPRE  
OBSCN  
CAMSAP1  
OR13A1  
ACBD7  
TM2D2  
PRKCZ  
KLK5  
FAM207A  
TCF20  
C12orf51  
MIPOL1  
SNORA42  
GZF1  
GGT3P  
ARHGAP17  
IPO9  
LOC100287813  
MGEA5  
EFNA5  
KIAA0284  
LAMB2P1  
GRB10  
TNFRSF6B  
XLOC\_012754  
C6orf1  
TLE3  
TMEM185A  
CDH1  
LOC100509105  
C1orf124  
C17orf51  
SNORD83A  
CDC34  
XIST  
ARFGAP3  
XLOC\_12\_004371  
HSF2

PELI2  
LOC100130876  
PSMB9  
ST14  
SNORA73A  
TBC1D9  
C19orf59  
FUT8  
CD6  
GPR137B  
MFAP2  
SLC29A1  
PLCB2  
EPS15L1  
XLOC\_011837  
RBP5  
PDXK  
LOC100505933  
XLOC\_006321  
ETV5  
SYTL1  
PPP1R18  
LOC100506394  
VAC14  
CPLX1  
XLOC\_000495  
SNORA81  
RAB33A  
FBXO36  
SNORA80  
PDK2  
SNX27  
LOC100131826  
PTPRCAP  
XLOC\_005041  
PIP5K1B  
RNF149  
SMG1  
HDAC3  
WNK2  
SPSB3  
ABHD3  
TRIM62  
SUSD2  
SNORD101  
ZNFX1  
UBE2H  
SNORA80B

F11R  
BAHD1  
STXBP1  
RNF157  
XLOC\_12\_015037  
XLOC\_014388  
STAT3  
WDR83  
XLOC\_012162  
POU3F1  
MAPK15  
SPIB  
ABCD1  
B4GALT1  
LRRC1  
SNORA23  
NAMPT  
DFFA  
COQ10A  
CD82  
KCNK5  
FADS3  
TBX10  
PLEKHG2  
SNORD74  
LOC100505815  
KIF16B  
XLOC\_12\_006745  
SNX29  
ENPP4  
C2orf54  
XLOC\_011448  
RNU105A  
EPHB3  
SCIN  
HYAL3  
PLA2G4C  
RALGPS1  
IFI30  
C1R  
MAP3K11  
GLTPD1  
TNFAIP1  
PMM1  
TMEM2  
LOC100506852  
ZNF707  
SYNJ1



LOC100132495  
RBBP5  
RIMKLA  
SLC25A36  
XLOC\_006037  
OCR1  
SHISA7  
XLOC\_12\_005438  
CGB  
C20orf106  
XLOC\_014237  
GDI1  
C1orf63  
USP37  
IL15  
SLMAP  
GTF2B  
FBXO46  
MAP3K9  
NUPL1  
XLOC\_009485  
NRARP  
XLOC\_12\_000010  
SMG7  
CDC42EP2  
CNTNAP1  
FLJ30403  
SPTAN1  
TMEM136  
XLOC\_011223  
GOLGA7B  
KIAA0226  
TOP1  
POLR2J4  
BIN1  
XLOC\_010376  
LIPG  
DNASE1L2  
FAM90A10  
BICD2  
LCN15  
LOC400958  
CA4  
FRY-AS1  
LOC100652730  
MXRA7  
NME7  
ZFAND3

PLXND1  
RILPL1  
CLIC3  
NPC1L1  
SLC6A6  
UNC13D  
TSL  
B3GNT4  
ADIPOR2  
DNAJC12  
KCTD5  
LOC100287803  
C2CD4C  
F2RL1  
SMTN  
PBXIP1  
NQO2  
LOC100505904  
CCDC130  
XLOC\_12\_000416  
RAP1GAP  
FRMD8  
XLOC\_12\_006026  
GRIPAP1  
SH2D6  
HERPUD1  
PIM2  
PIBF1  
HOTAIRM1  
THSD4  
GPT2  
C19orf26  
LCA5L  
GNMT  
USP33  
XLOC\_012192  
SCARNA9L  
USP32  
LAMC2  
LOC202025  
DGKZ  
LPCAT3  
XLOC\_12\_015034  
WDR66  
XLOC\_000683  
XLOC\_000048  
C3orf52  
YIF1B

LY6G6C  
LOC100507018  
LIX1L  
TBX3  
IL6ST  
ZNF789  
ARMC2  
ND4  
SIRT7  
LOC100129781  
LCK  
RAB26  
AKIRIN1  
WDR67  
SH3BP4  
GPAT2  
XLOC\_12\_000399  
TRIM11  
DGCR5  
MBOAT7  
BCR  
CROCCP2  
XLOC\_000350  
ARHGAP23  
TESK1  
LOC389791  
GLA  
ZNF251  
UCKL1-AS1  
ZNF709  
DNAJC6  
ULK4  
TTC39B  
LOC100653120  
TBC1D24  
XLOC\_001624  
GPR157  
LRRC31  
CATSPER2  
VWA1  
MALAT1  
XLOC\_007775  
PSAT1  
FBXO31  
SHANK2  
DYNC2H1  
SNORD87  
WDR19

FLJ21369  
MKLN1  
MICAL3  
LUZP1  
LOC100129034  
SPDYE7P  
MED20  
KCNK6  
SNORD29  
PC  
RANBP10  
ZNF10  
BCOR  
SNX1  
XLOC\_008185  
SLC46A3  
LRP6  
KIAA0930  
DIP2C  
MIR22HG  
ANKRD54  
DRAP1  
SNORD22  
ZNF555  
DNAJC5  
PRKAB2  
DENND4C  
CGN  
FANCB  
LEPREL2  
STX1A  
CERS5  
LIPH  
ADAM11  
RNU4ATAC  
C16orf80  
IFNAR2  
C10orf137  
MAPK8IP1  
BBOX1  
LEPRE1  
TJAP1  
LOC100506990  
TXNRD1  
PTPRJ  
TSC22D1  
FUZ  
CCDC157

DGKD  
STXBP4  
MGAT4A  
GPR3  
PCYT2  
PPP1R13L  
MACF1  
MYH9  
COL20A1  
ZDHHC14  
FOKK2  
SLC30A1  
FANK1  
XLOC\_12\_005781  
USP12  
SNORD34  
ZACN  
XLOC\_013506  
SNORD68  
NEAT1  
ARHGAP4  
MAFK  
C1orf52  
C1orf81  
ACSS2  
VWF  
PLEKHG1  
IL23A  
XLOC\_014105  
TSC2  
RALGAPA2  
XLOC\_012009  
KIF1B  
NPHP3  
XLOC\_12\_015209  
WDR91  
AFAP1-AS1  
REEP6  
C6orf228  
SPTSSA  
LOC100505717  
WNT7B  
ZNF608  
LOC100653178  
NCK2  
UBR2  
SNAPC2  
KCNAB2

MAP3K3  
DNAH6  
IQSEC1  
FBRSL1  
SHH  
ABL2  
BCL2L12  
PTPRN2  
SLC1A5  
XLOC\_12\_005130  
CHMP1B  
AK1  
AP1S3  
POFUT2  
ARL14  
XLOC\_12\_009883  
VPS13C  
AFF4  
XLOC\_010207  
LOC100652766  
C17orf28  
FAHD2A  
VPS18  
MAP7D1  
RPS6KB1  
ZNF79  
ANKRD30BL  
MAX  
XLOC\_014243  
ZBTB43  
STRA6  
LINC00341  
PRSS30P  
C1orf195  
ANKRD30BP2  
CHD9  
ACOT7  
HPN  
ELL  
SNORD67  
C15orf26  
SGMS2  
HDAC5  
GGA1  
XLOC\_12\_008203  
CCDC88B  
C12orf44  
CDH24

XLOC\_007413  
OSBPL3  
DDX26B  
C9orf85  
CAPN8  
XLOC\_003481  
ZNF77  
MIA3  
AFF1  
TRA2B  
EPB41L5  
CDC42BPB  
PRRT4  
CASP10  
HES5  
ANKFY1  
SUFU  
SLC2A1  
C14orf55  
TSIX  
TRIP10  
C6orf141  
DNAL1  
TGIF2  
MKL1  
TBC1D2B  
CIDECP  
XLOC\_009122  
LYG1  
HSPG2  
SNORD125  
ZFAND2A  
TSPYL2  
MYPOP  
NPIP  
PQLC1  
NT5DC3  
ZNF654  
ACHE  
SULT1A4  
AGFG2  
TSPAN15  
MPV17L2  
CEL  
LOC100499467  
DOCK6  
ZBTB5  
KIAA1462

KIFC2  
ZNF224  
MYH7B  
XLOC\_12\_000092  
FLCN  
GPR137C  
XLOC\_013994  
LOC100505930  
KDM4B  
TCF7L2  
BAGE  
TULP3  
RASD1  
LOC100506428  
LINS  
SPECC1  
SYS1  
ATG9B  
XLOC\_12\_010330  
CLIP3  
PLEKHG5  
SLC25A35  
GOLT1A  
NINJ1  
EPHB6  
PHRF1  
XLOC\_008916  
RIPK4  
EDA  
KCNJ14  
OPTN  
FNDC3B  
UBXN7  
GZMM  
LOC645638  
PRODH  
GPR162  
DPM2  
ZNF474  
TAF3  
C1orf228  
SLC5A11  
MAD2L2  
MICAL2  
XLOC\_002577  
SCARNA20  
VGF  
BACE1



CALML5  
TP53INP1  
SEMA6C  
CLCN2  
FGFR3  
WDR60  
SLC38A2  
SELPLG  
SNORD32A  
FAM160A1  
MAP3K10  
KIAA1432  
JDP2  
C12orf70  
FZD9  
OR2AG1  
INPP5A  
MYO7A  
LOC100506183  
PKD1  
SLC22A5  
CD81  
FAM167B  
ABHD6  
ARHGAP29  
PPP2R2D  
WFS1  
OVOL1  
AKAP5  
TOR1AIP2  
LRRC8A  
HPCAL1  
XLOC\_008559  
LOC100505633  
SOCS4  
IER2  
PPAP2B  
MOB2  
ZFAND5  
PIKFYVE  
TSEN54  
PP12719  
MED26  
BTBD19  
CYP3A7  
ATP7A  
CPT1A  
SPATA2L

LINC00340  
ERVMER34-1  
RASA3  
XLOC\_004640  
SGPP1  
SHD  
CDC14B  
GTPBP2  
SERPINA6  
FOXD4  
FANCM  
GGT1  
KCTD13  
CREB3L2  
FAM132B  
TTLL5  
PRKAG2  
PPP1R12B  
XLOC\_007776  
LOC642852  
CISH  
CRY2  
TAP1  
OTUD1  
SNORA10  
PRRG1  
ZCCHC14  
SSBP3  
GAFA3  
LLGL2  
ZFYVE28  
SAMD8  
XLOC\_000340  
ZNF124  
LOC100130419  
XLOC\_007813  
HERC1  
LOC100129675  
CYP39A1  
XLOC\_013350  
PGPEP1  
KLF10  
TLE1  
ZNF815  
LOC283624  
ARID4A  
CYP3A5  
LUC7L3

TBC1D22B  
ETV3  
ATP13A3  
CDK18  
LOC440910  
FLJ32224  
XPA  
XLOC\_009181  
ARRB2  
XLOC\_003738  
ZNF778  
NR6A1  
FAM106CP  
LOC100506800  
ZNF821  
QSOX1  
XLOC\_005426  
PDE4DIP  
TMEM92  
ADAM20  
FAM82A2  
METRN  
RMRP  
ATF4  
MLLT4  
ZFP36L1  
PCBP4  
DRD4  
MEGF6  
ENDOD1  
CD14  
LMTK2  
DIO3  
SNX18  
LOC440905  
SNORD30  
TRAM2  
PEAK1  
XLOC\_013364  
THBS1  
OCLN  
XLOC\_006263  
PECAM1  
RLF  
C7orf54  
CENPT  
SLC6A10P  
HPSE

GP5  
C15orf5  
XLOC\_12\_013293  
GNB1L  
C1orf135  
FUCA1  
GBP1  
SNORD3B-1  
REL  
SLC24A3  
C5orf56  
LOC254100  
ST6GALNAC3  
PFKFB3  
FAM108A1  
SNHG1  
CLDN7  
HN1  
XLOC\_12\_015561  
CTNND1  
MCTP2  
XLOC\_005737  
XLOC\_010601  
XLOC\_008223  
SNORD25  
SLC9A3R1  
LOC100132240  
XLOC\_12\_001138  
DCBLD2  
RAB9A  
TPMT  
PROC  
PDLIM5  
XLOC\_12\_008888  
FLJ43315  
TSPAN5  
SLC12A4  
DEPDC7  
LOC100507412  
EFHC1  
FMNL2  
TSPAN33  
ISYNA1  
ZRANB1  
FHDC1  
SLC31A1  
KLK9  
CEP170

ADRBK2  
ADRA2C  
CD59  
PIEZO1  
RSL1D1  
NOSIP  
LOC100130899  
FAM102B  
C7orf43  
LAT2  
MYO10  
RUNDC3A  
C9orf140  
P2RY1  
FAM135A  
CHST7  
GALNT6  
MARCH3  
SNORD94  
RASSF6  
FOXO1  
PDZD7  
TBC1D10B  
C19orf28  
S100A1  
C21orf88  
ARHGEF18  
JUNB  
CHN2  
UPP1  
PAPLN  
PAPD5  
ZSCAN5B  
EFCAB3  
XLOC\_001023  
CTSL2  
TMEM81  
FBP2  
LDHD  
XLOC\_013445  
SV2A  
LOC728431  
NR1D1  
PHF20L1  
CCDC116  
CDX1  
ZBTB10  
FOSL2

IL18BP  
BREA2  
XLOC\_003881  
LMOD2  
PAQR5  
IL1RAP  
RHOD  
XLOC\_005442  
STON2  
UBR4  
PNPLA7  
PPARGC1B  
PAFAH1B2  
CSNK1E  
HSP90AB4P  
LILRB5  
LOC650293  
KIDINS220  
SIRPG  
TSPAN32  
LOC100506245  
OSTM1  
PLIN1  
PCSK7  
ZNF385A  
C16orf87  
ANKRD36B  
TMEM145  
LOC100289187  
SNORD36C  
SCML1  
KCTD17  
RTTN  
SCARNA17  
CCNE1  
ANKRD11  
XLOC\_12\_014686  
SLC22A23  
DTX2  
DNAJB5  
XLOC\_003480  
HIVEP3  
FAM107B  
XLOC\_001699  
AHR  
MFSD2A  
PFKP  
GPR133

CBL  
C7orf51  
UGCG  
ELL2  
PTCD3  
SGK1  
SPATA6  
LINC00483  
TTLL7  
GNAI2  
XLOC\_12\_006578  
XLOC\_000794  
SNX25  
KIAA0895  
CCDC126  
AK7  
EGR4  
XLOC\_12\_004854  
LRIG1  
XLOC\_004700  
S100A14  
GDPD1  
PPP1R9B  
ADORA2B  
PVRL4  
XLOC\_008614  
LAMA5  
DCUN1D3  
XLOC\_009684  
FER1L4  
SNRNP48  
PCSK5  
RUNX1  
CEACAM1  
HIP1R  
IRGM  
TPRA1  
SYNJ2  
NMUR2  
GNA11  
H2AFB3  
C16orf93  
XLOC\_008100  
HS6ST1  
SLC12A7  
XLOC\_12\_007644  
KCNA10  
CDC14C

PHLDB3  
psiTPTE22  
ANKRD36  
RPS2  
LOC100128670  
TMEM229B  
RAPH1  
LOC100506342  
TNFRSF21  
CKB  
XLOC\_014137  
STK17B  
ZNF519  
XLOC\_009382  
LOC100130193  
C13orf16  
SAMMD4A  
LOC100505675  
PTGS2  
RALGDS  
CIB2  
LOC284581  
VDR  
MLF1  
XLOC\_001230  
TTYH3  
PIM3  
ROM1  
SNHG7  
ZNF221  
KANK2  
DIO3OS  
CNGA1  
SLC27A1  
CMTM1  
GAS2L1  
CDX2  
FHL2  
CYP26B1  
RECQL4  
POTED  
OTUD7A  
AFMID  
FGF11  
BTAF1  
P39194  
TBC1D20  
SERPINA3



GUCA1B  
RGNEF  
KIAA1549  
RHOBTB3  
ORM1  
CDA  
SLC25A16  
KBTBD8  
KIAA0907  
XLOC\_002131  
PODXL  
GOLGA6L9  
GRHL3  
TNFRSF10D  
CAMK1D  
PLCD4  
ITGA3  
CIDEA  
TANC2  
TESK2  
XLOC\_12\_009571  
PRKCE  
LOC100127885  
SNORA21  
HCFC2  
FLJ31104  
RPS24  
PPP1R12C  
SCARNA4  
CD86  
ZDHHC3  
LOC100652777  
PDPK1  
SYT15  
EIF4A3  
RHCG  
NOTCH2  
CNNM2  
LOC100506157  
IGSF3  
SH3TC1  
SLC9A5  
CNP  
PRSS35  
RHPN2  
SDHAP1  
CALCOCO1  
DDHD1

SEC16A  
LOC100507305  
GIPR  
KIAA0913  
MAN1B1  
HK2  
GAFA1  
SNORD100  
LOC100507364  
XLOC\_005968  
RANBP6  
STK17A  
MRGPRF  
SDCBP2  
INPP4A  
TMEM189  
LOC541471  
ACOXL  
TMEM190  
FAM83G  
TNIP1  
LOC644662  
ABCC1  
LOC643650  
MIR7-3HG  
ATG4B  
TNFRSF13C  
PGAP1  
FGFBP1  
ZNF598  
BAIAP2L1  
HEBP1  
SHF  
SNORA57  
NOTCH2NL  
BAI1  
XLOC\_12\_013001  
ND2  
XLOC\_12\_001064  
SLC41A1  
ZNF703  
TPPP  
CTH  
KLHL30  
LMF2  
PIGH  
SCG5  
LOC100190939

GK  
ADCK3  
SNX22  
SEPX1  
FRRS1  
GLIS3  
DAGLB  
LOC143666  
C1orf170  
LOC283174  
LOC648149  
SBF1P1  
IL28RA  
PLAUR  
RNF183  
SNORA33  
EFNA4  
LOC283050  
ERI1  
LRRN4CL  
XLOC\_007368  
CHR1  
FLJ23867  
PALM3  
GPBAR1  
LOC100505634  
LOC100653030  
SLC25A37  
PRIC285  
RTN4R  
GGTLC2  
C3orf35  
LEAP2  
PRR20B  
ALDH1A3  
SNORD43  
SIK1  
SNORD84  
GABRE  
MPRIIP  
LIN7B  
XLOC\_011535  
FAM70B  
LRWD1  
LOC401052  
SNORD50B  
XLOC\_009868  
FSD1

GJB4  
CYFIP2  
XLOC\_12\_006027  
SLC2A8  
ZNF833P  
GAK  
KSR2  
XLOC\_008487  
LBH  
LOC100506123  
B3GAT1  
KCNC4  
UBXN11  
ACCN3  
SCARA3  
MYO9B  
CCDC75  
FARP2  
FBXO32  
LOC100505664  
MIAT  
ENGASE  
FOXJ1  
XLOC\_001351  
CT45A1  
TFAP2E  
SPATA13  
TMEM45B  
XLOC\_004122  
XLOC\_12\_013116  
NXN  
SLC19A2  
XLOC\_012065  
KIAA1539  
MB21D2  
ZNF780B  
ANKRD13B  
LOC401561  
LOC644192  
NIPAL3  
IGFL1  
XLOC\_12\_014098  
SCARNA2  
VLDLR  
CYP2D6  
CSDC2  
KIAA0664L3  
HEXIM1

SYTL4  
RNF114  
ICAM2  
ADAMTSL4  
GLS  
ENPP1  
DNAJB3  
XLOC\_011924  
ACSF2  
LILRA3  
SCARNA11  
LOC149773  
KLHL28  
ZNF516  
SNORD89  
POLR2F  
POU3F3  
NOTCH1  
PLAG1  
XLOC\_001576  
LOC729513  
BCL2L11  
RNF208  
XLOC\_12\_011901  
PDIA2  
CBX6  
SARDH  
SSC5D  
UBAP1L  
XLOC\_005082  
CEP72  
SNORA4  
LOC387895  
MAN1A1  
CACNA1G  
XLOC\_000922  
INSR  
WNT4  
AAK1  
CHTF18  
TNFRSF11A  
XLOC\_12\_007802  
LOC100288092  
TNNI3  
RAB11FIP3  
MIDN  
SPAG9  
STK4

FLJ45248  
LOC100128001  
S100P  
ITPR1  
TMEM184B  
VAT1  
PLA2G10  
XLOC\_002133  
STK40  
AQP7  
ALS2  
XLOC\_012078  
EZR  
FOXP1  
TSPAN9  
PLAT  
CD74  
GPCPD1  
NPAS2  
PCSK4  
CHST12  
NFATC2  
CCNL1  
PIK3CD  
XLOC\_12\_007928  
SNORA52  
XLOC\_12\_013873  
FLNB  
LOC100505882  
XLOC\_011563  
LOC100507594  
TCEAL6  
XLOC\_12\_003295  
DNAJB1  
APLP1  
OR7E91P  
ZFPM1  
C9orf89  
GRIN1  
PLCG2  
KLK4  
RAB3B  
XLOC\_008809  
FKBP5  
AGPAT9  
LOC143188  
MAP2K3  
PCOLCE

DAAM1  
XLOC\_000755  
SERP2  
SYNGAP1  
FAM161B  
XLOC\_013866  
XLOC\_12\_002171  
LOC388152  
XLOC\_12\_010568  
SNORD48  
TRIM4  
FAM132A  
CECR7  
LOC100507580  
ARHGEF26  
GPR124  
XLOC\_003522  
LOC153577  
SCARNA10  
BCAM  
MAFB  
XLOC\_014139  
KDELC1  
ZNF217  
FLJ35390  
HRASLS2  
MAPK11  
IGLL1  
LOC100507918  
VILL  
LTB4R  
WNT6  
C7orf52  
MBP  
MSGN1  
POTEB  
LOC100505555  
PACSIN2  
RPS21  
ATP6V0A1  
FBXW10  
XLOC\_002793  
PTPN13  
C6orf154  
SBF1  
SEMA6A  
GPR153  
WNT11

MIB2  
CPNE5  
XLOC\_011872  
KCNF1  
DOCK9  
Q8N7V6  
IL6R  
TMEM110  
TTC7A  
WWC3  
LOC100190986  
LOC100509213  
C16orf55  
XLOC\_12\_005076  
GK3P  
PPIEL  
IL27RA  
XLOC\_012593  
SNORD4B  
LOC100131234  
XLOC\_006335  
LOC100128477  
TTBK2  
XLOC\_12\_008151  
JARID2  
SLCO4A1  
TTLL10  
GOLGA2  
XLOC\_12\_015033  
SNORA68  
LOC100132354  
MAST3  
LEMD1  
TCIRG1  
MUC12  
COL23A1  
PACSIN1  
XLOC\_12\_003974  
PIP5K1C  
XLOC\_12\_007834  
ANKRD2  
ZDHHC8  
RDH13  
SLC25A30  
LMF1  
LOC100131831  
GSTM4  
TNXB



RASGEF1A  
LOC100131820  
LOC728802  
SCARNA6  
CCDC85C  
SPTBN5  
NXF1  
LOC100131702  
LOC100268168  
XLOC\_000194  
ATP2B4  
GRK5  
ABCB1  
LOC100505551  
C16orf70  
UNC5CL  
RPS27  
EXOC8  
FAM89B  
ECE1  
ULK1  
LOC100129363  
INHBE  
GAN  
PMAIP1  
C6orf124  
DEGS1  
LRFN1  
SHB  
CDC14A  
FAM126A  
C17orf67  
CCP110  
MBNL2  
XLOC\_004517  
FEM1C  
LOC100129617  
IZUMO4  
PLIN3  
SOCS7  
XLOC\_005488  
XLOC\_012393  
CD55  
OAS1  
XLOC\_006505  
XLOC\_12\_014369  
TTLL11  
XLOC\_003482

ALAD  
ISG15  
JUN  
XLOC\_013932  
LOC100506641  
CLEC16A  
SLC25A29  
LOC100505668  
XLOC\_12\_002204  
HLA-F  
BTN2A3P  
GOLGA6L5  
PRINS  
KHK  
SNORD35A  
TMEM206  
LOC728705  
PLAU  
TSPAN4  
TTL  
PGM2L1  
FAM53C  
MARK4  
MFGE8  
INSL4  
XLOC\_011480  
SETD3  
XLOC\_12\_015127  
XLOC\_12\_009285  
TBC1D10A  
TRIM3  
LRRC16B  
SH3D21  
PMPCA  
GPC1  
SNORA53  
XLOC\_008556  
XLOC\_12\_004317  
PPARGC1A  
LOC283070  
SLC7A5P1  
KIF7  
NUDT17  
APOC3  
LPIN1  
C7orf53  
CLDN23  
ZNF296

FAM55C  
SLC25A44  
COX6B2  
LOC338620  
C6orf25  
C6orf222  
RARA  
LOC100505760  
LOC202181  
CTGF  
SLC25A22  
XLOC\_009526  
XLOC\_12\_006152  
XLOC\_010377  
XLOC\_008619  
XLOC\_013950  
PLGLB1  
PIIP5K1  
XLOC\_12\_008221  
RN7SK  
MLLT11  
RHOXF1  
LOC729652  
ANXA6  
WNT10B  
CCRN4L  
SRPK3  
LOC100506890  
NPIPL2  
LINC00260  
LOC100507165  
ATP2C2  
PLEKHM1  
FLJ35024  
PAG1  
CDHR5  
XLOC\_002830  
FYN  
FAM131A  
LOC100653024  
GRIN2C  
SUN1  
LOC728061  
XLOC\_002085  
MYO15B  
SNORA44  
TLE6  
PDHA1

C1orf9  
PYGM  
NCKAP5L  
SNORD83B  
ACSBG1  
CT45A5  
XLOC\_12\_011291  
TBPL1  
XLOC\_000302  
XLOC\_009007  
KCTD6  
BCL6  
TMEM45A  
ND5  
SQSTM1  
MAP4K2  
LOC285957  
LOC100127886  
RHBG  
PPL  
ZNF324  
ENPP2  
GGTLC1  
MXD1  
SPTBN1  
SERPINA5  
FZD5  
SNORD76  
XLOC\_008439  
DISP1  
LOC100507563  
LOC100505725  
ILF2  
LOC100287177  
XLOC\_12\_004611  
C20orf160  
VAX2  
WDR26  
PLB1  
XLOC\_002987  
GDF11  
AGSK1  
C20orf54  
XLOC\_12\_015038  
JMJD7-PLA2G4B  
C14orf45  
PPFIA1  
LOC100505988

XLOC\_006336  
TBC1D2  
SH3BP2  
NKD2  
ST5  
NDOR1  
TAGLN  
XLOC\_014247  
OTUD3  
SPON2  
AGPAT2  
LOC390940  
MAP1LC3B  
LOC100507803  
CYHR1  
NPC1  
RSPH3  
XLOC\_008466  
XLOC\_001441  
LOC100129399  
XLOC\_006092  
MKNK2  
C10orf116  
LOC440330  
CYP2B6  
FMNL1  
USH1G  
SYT7  
SNX30  
EHD4  
SOX2  
HIP1  
ARHGAP39  
PLEC  
POGZ  
PHF1  
GRIN3B  
MEGF9  
STAB1  
NEK10  
ABLIM3  
PLLP  
BAK1  
CYP1B1  
RNF223  
C14orf37  
PKIG  
LOC145757

LIMS3L  
C10orf54  
SLC46A1  
NRP2  
NHLRC4  
KRT16  
RNF207  
PDXDC2P  
NNAT  
XLOC\_12\_005179  
PELI3  
FBXO27  
CCL3  
APBB3  
KIAA1984  
TMED6  
HIVEP2  
TMEM120B  
KCNH2  
SNORA65  
GCDH  
ARFGAP1  
CDC42BPG  
SCARNA5  
IRF6  
XLOC\_012912  
USP49  
RASGEF1B  
LIN37  
PRSS48  
LOC344595  
XLOC\_002035  
CARNS1  
ADAP2  
CLEC3B  
POU2F3  
XLOC\_014399  
ULBP3  
LOC100652769  
ZBED2  
TNFRSF1B  
SLC2A5  
XLOC\_12\_013267  
TMEM170B  
PAOX  
FAM25A  
CSGALNACT2  
ZFP36

ETS1  
CLDN11  
SAT1  
ICOSLG  
PI4K2A  
CTSK  
LOC643201  
MID2  
LOC100132247  
XLOC\_12\_005020  
ATP13A2  
GAPVD1  
LOC442028  
LOC100652915  
GATS  
CHRNA10  
POTEE  
SNORD31  
KLHL5  
RFX2  
FCHSD1  
MYT1  
RAB8B  
DHRS9  
XLOC\_002356  
FOXD1  
ACER2  
IFFO2  
ZNF556  
LOC284219  
PRDM2  
LOC100506802  
PPP1R13B  
LOC100507639  
MRPL42P5  
MAPRE2  
SYTL2  
XLOC\_010881  
Q6LRY1  
VPS53  
GSTM1  
XLOC\_006513  
C4orf21  
XLOC\_000214  
SERPINE2  
LOC100509256  
ASMT  
SLC43A3

LNX1  
TRIM50  
ST6GALNAC6  
SESN3  
LOC440300  
LOC100509487  
AP3B2  
PPARA  
CATSPERG  
SLC9A3  
EFNB3  
UBAP2  
OSBPL7  
ZNF711  
KREMEN1  
LOC400499  
PRR5-ARHGAP8  
ZBTB48  
LOC100507309  
TSPAN10  
STARD5  
ASB6  
AFAP1  
SLC16A10  
KLHL15  
LOC100130987  
AMH  
LOC100128198  
GLI2  
XLOC\_12\_009301  
POR  
MFSD4  
XLOC\_010945  
XLOC\_12\_012678  
EXOC3L4  
USP17  
TAOK2  
KIAA1467  
CLSTN3  
DAPK2  
ATP8A1  
C17orf76  
ALDOC  
TTC16  
OXTR  
UBE2Q2P1  
GTPBP3  
NR3C1



TBC1D8  
ANKRD42  
NLRC5  
LOC100506047  
CCDC64B  
C12orf5  
XLOC\_009576  
CLEC18B  
LOC100505787  
RNU1-5  
LOC100294362  
DKFZp434J0226  
KRTAP5-8  
B3GAT3  
Q6BWL2  
TRIM10  
ATG16L2  
COL6A1  
C10orf114  
SPTBN4  
LOC100128292  
ZC3H12A  
PORCN  
TTC9B  
STARD9  
RPS6KA5  
CLDN9  
LOC338653  
C6orf81  
LOC652990  
TAC3  
DISP2  
KIAA0247  
XLOC\_003235  
SLC26A1  
NDRG1  
PPM1N  
LOC646999  
SIRT2  
MEF2B  
FAM85A  
GIT1  
HSPA2  
NR2E3  
MTSS1L  
RPUSD1  
VTRNA1-2  
LOC650368

AQP3  
VCL  
LRFN3  
NCF1  
NTNG2  
MAMSTR  
ST6GALNAC4  
WDR96  
XLOC\_007262  
SLC2A6  
KLK8  
BACH1  
CCL27  
XYLT1  
LOC100134138  
RNGTT  
ALDH8A1  
AGT  
DAPL1  
FOSL1  
LOC100131366  
PLEKHA4  
PI4KAP2  
SLC31A2  
XLOC\_009458  
SNORA64  
AQP10  
TMEM236  
LOC100130930  
KISS1  
C1QL1  
IL20RB  
TMPRSS7  
NGEF  
PCNXL2  
KRT35  
PRO0628  
STRC  
CACNA1A  
RAET1K  
HEY1  
PIDD  
LINC00482  
TOR1B  
JAKMIP3  
NINL  
NAB2  
CABYR

ST3GAL4  
AMBRA1  
NKIRAS1  
FAM118A  
AIM1L  
ARSK  
TNNT1  
ANKRD27  
NKAIN4  
NPHP1  
CNPY4  
C18orf45  
LOC283588  
CCDC84  
PLEKHM3  
GPRIN1  
LOC100653017  
sept-12  
KCNMB4  
CD164L2  
TRAF3IP1  
MMP15  
ANKRD33B  
FBXL18  
FRY  
LONRF2  
IGFALS  
FLJ42022  
IDI2-AS1  
GCNT1  
RAB24  
DENND5A  
SEC61A2  
VTRNA2-1  
XLOC\_005039  
AGPAT4  
RNU6ATAC  
SERHL2  
BCO2  
C10orf47  
CBFA2T2  
FAM40B  
VTRNA1-3  
XLOC\_12\_001947  
MAST1  
MUC17  
TMCC3  
RPS6KL1

TRIM41  
FGF8  
ABCA7  
LRRC3  
PLCD1  
POLH  
SNN  
FLNA  
XLOC\_013981  
CBR3  
TMEM52  
DGKA  
LOC100506688  
TMEM98  
HMHA1  
LOC440792  
PLCXD2  
RPL32P3  
RSPH4A  
AVIL  
DNHD1  
ITGA10  
SYTL3  
TSC22D2  
SOX8  
KIAA0319  
CRYGS  
PLXDC1  
LOC100131774  
SNORA17  
XLOC\_008711  
PRKCD  
HTR7  
LPAR5  
TUBB2A  
RSU1  
TBX19  
LPPR2  
KIAA1671  
RAB30  
KIRREL2  
SNAPC4  
OSTBETA  
RIOK3  
HES2  
XLOC\_012688  
LOC729668  
COL16A1

XLOC\_000421  
PHYHIP  
KIF3A  
LOC440993  
SERPINF1  
HSD3B1  
BTBD11  
G0S2  
ZNF114  
LOC399715  
TUBGCP6  
XLOC\_014257  
ESAM  
LOC100129268  
ADA  
XLOC\_012515  
TMEM132A  
F3  
C2orf48  
SCPEP1  
CCDC114  
TNNT2  
XLOC\_003734  
XLOC\_000625  
SLC16A3  
LINC00222  
LOC389199  
NANOS3  
CCDC153  
ISG20  
XLOC\_013906  
REC8  
LOC100131726  
GLI1  
LRRC43  
IRF7  
LOC100130849  
LOC100130547  
LOC100507419  
GLCE  
XLOC\_12\_013931  
XLOC\_007205  
XLOC\_012021  
FAM182B  
XLOC\_002122  
ALAS1  
BMP8B  
XLOC\_12\_015239

UBE2Q2P2  
EPHA2  
SPDYA  
EFR3B  
NSAP11  
PLXNA4  
XLOC\_005748  
XLOC\_003327  
CCDC164  
XLOC\_005341  
HIC2  
PNPLA2  
LOC100652965  
XLOC\_013100  
ADAMTS17  
DOC2GP  
HOXC13  
XLOC\_000670  
UNC119  
ZNF775  
AZI1  
PITPNM1  
CCDC19  
MCAM  
PADI2  
JUND  
CNN1  
TNK2  
TRPC1  
SLC35E4  
MUC4  
XLOC\_000011  
PRSS8  
KIF5A  
RHPN1  
XLOC\_012679  
RIIAD1  
KLHL26  
MPZL3  
GOLGA6L10  
H1FX  
DOK3  
CACNG8  
PIRT  
C9orf174  
FAM115C  
INPP5J  
SLC22A4

SPEG  
RNF39  
ARHGFE25  
GAMT  
FNBP1  
Q93YZ4  
DIXDC1  
DENND1C  
NES  
ATP1A1  
DEFB1  
LOC100289090  
CLMN  
CORO7  
PDE9A  
RNF19B  
LIPE  
LRRC8E  
C6orf204  
USP35  
XLOC\_005273  
SGCA  
LOC100128402  
XLOC\_12\_010602  
LOC100129999  
NEURL1B  
CBX2  
SPAG8  
MICA  
LOC100506268  
LOC100128517  
ATP1A3  
LOC100289211  
RPPH1  
ACAP3  
PLEKHO1  
CCDC146  
EPHB2  
SPACA4  
SERTAD2  
ADARB1  
LMBR1L  
PMEPA1  
KCNN4  
SLC23A2  
S1PR4  
LOC619207  
XLOC\_013788

KIF21B  
CELSR2  
HIPK4  
WDR47  
LOC100508869  
FAM73B  
CCDC11  
TTC21A  
UBE2Q2P3  
LOC100506124  
IRGQ  
HDAC10  
PAGE2B  
SH3BP5  
TLE2  
MYO1E  
SAT2  
LOC100129380  
INPP5K  
C22orf23  
PLCXD1  
XLOC\_010194  
ATP8B2  
XLOC\_013711  
IQCD  
LOC283887  
RNF216  
LOC100652768  
C20orf96  
ZDHHC11  
OVGP1  
MYLK2  
FLJ30064  
ADAM8  
BLVRA  
PALM  
SPTSSB  
XLOC\_12\_006080  
LAMA3  
KLHL17  
C17orf96  
LOC100131829  
LOC644242  
COL28A1  
MUSTN1  
SLC26A11  
RNF122  
C18orf8



CX3CL1  
EVI5L  
XLOC\_003854  
C1orf226  
TRIM52  
C19orf51  
XLOC\_006994  
ANKDD1A  
XLOC\_009146  
PLEKHH2  
SNHG12  
MAPKBP1  
SERTAD1  
FGD6  
ELF3  
NR1H4  
LOC100130713  
XLOC\_013905  
LOC100616668  
FAT4  
CDRT1  
LOC100128857  
XLOC\_12\_010118  
LOC100652843  
SRRM5  
SSBP2  
CCDC80  
SEMA3G  
SMAD7  
H19  
XLOC\_008149  
FKBP14  
PDXP  
C5AR1  
LRRC15  
MICALL2  
LOC100130357  
ITGB7  
KCNK7  
KCNN2  
LRRC24  
XLOC\_12\_007204  
SCARNA8  
NFIL3  
XLOC\_009944  
XLOC\_12\_005553  
PPARD  
KCNC3

DGCR14  
PFKFB2  
GADD45A  
XLOC\_12\_011043  
PTK2B  
LOC100133669  
SLC24A6  
ARG2  
PCYOX1L  
GOLGA6L6  
XLOC\_12\_005517  
IGSF8  
XLOC\_12\_003897  
XLOC\_006721  
FGF22  
ANKRD13D  
CCDC96  
RAD9A  
LARP6  
HLA-DOB  
SNORD99  
CPT1C  
SH3PXD2A  
AHRR  
RAB36  
TMCO2  
ESPN  
TIGD3  
NPHS1  
RAB44  
DCDC2B  
XLOC\_12\_014421  
XLOC\_009797  
TRIM25  
SPIRE1  
LOC100506766  
HSPB11  
FZD4  
LOC100132077  
NUAK2  
MAPK8IP3  
XLOC\_013356  
ERVK13-1  
HTR7P1  
FRMD6  
LOC401317  
LOC100289488  
ZBP1

MAFF  
SNORA43  
PRICKLE3  
FAM102A  
PLA2G15  
PRKCA  
C4orf32  
PLA2G4D  
CSF1R  
OR8G1  
CGNL1  
GAST  
ASMTL  
FAM90A1  
C14orf43  
ZDHHC20  
ARNTL  
BTNL8  
RAPGEFL1  
TTLL13  
LAG3  
C17orf69  
XLOC\_013732  
RELL1  
SGTB  
XLOC\_013712  
CDKN2D  
XLOC\_010378  
XLOC\_012288  
LZTS1  
SKI  
MBOAT2  
LAMP3  
C11orf94  
PVR  
AKNA  
CCDC148  
GNG3  
OASL  
CLDN6  
C6orf132  
XLOC\_000055  
XLOC\_12\_015593  
GDF1  
XLOC\_009191  
DGAT1  
SPTB  
PTGER4

XLOC\_010542  
RASAL1  
CXCL6  
C4orf47  
XLOC\_009487  
ZNF385C  
CLEC4A  
RPL23AP32  
TUBB6  
RNU2-2  
ENTPD2  
TMC8  
LOC100131796  
PLCE1  
SERAC1  
MGC4294  
PNPLA3  
FLRT1  
ZMIZ2  
SPSB1  
GLB1L3  
SGK223  
GSDMB  
LOC90246  
SMPD1  
XLOC\_013772  
ADAM32  
LGI4  
CFP  
EFNB2  
FAM90A7  
LOC100506791  
NFATC4  
CDH3  
GLRX  
SEMA3F  
PIGR  
ARHGAP26  
GRAMD1A  
C17orf109  
NDRG4  
LOC388588  
MSX2  
XLOC\_013368  
SPRED3  
HCN3  
LOC286059  
XLOC\_12\_014820

PLEKHH3  
XLOC\_002132  
FUT7  
XLOC\_002169  
XLOC\_12\_001537  
XLOC\_012568  
ZNF697  
XLOC\_001048  
JAG2  
NOTCH3  
XLOC\_010989  
XLOC\_001243  
LOC100133190  
ATP6V0D1  
NLGN2  
LOC100506001  
ITPKA  
XLOC\_009943  
TAOK3  
EMP1  
XLOC\_004693  
DAPK3  
SOCS1  
XLOC\_011284  
RFPL2  
PFKFB4  
NKPD1  
NCEH1  
FAM71A  
SNORA14A  
ATG2A  
PRSS53  
IQUB  
TPRN  
VAMP1  
XLOC\_012343  
XLOC\_002345  
LOC100128697  
RAB6B  
TNKS1BP1  
PLEKHO2  
FUT1  
TRIM15  
GRHL1  
KANK3  
SLC4A3  
LOC100130276  
XLOC\_12\_012323

PMEL  
CEACAM22P  
MYOM1  
RBM44  
PIP4K2A  
LOC645195  
BCAS4  
XLOC\_000388  
IZUMO1  
IRAK2  
LOC100505576  
ZFHX2  
ENPP5  
XLOC\_001133  
LOC100652797  
DENND2C  
XLOC\_000101  
LHX1  
XLOC\_12\_000969  
C12orf34  
XLOC\_12\_014504  
PTGDS  
C20orf195  
HIST3H2BB  
SIPA1  
LGALS7  
JAKMIP2  
ATPAF1-AS1  
GPR146  
BTN2A2  
XLOC\_12\_012847  
MGC50722  
SNORA61  
CYP46A1  
ZNF253  
LOC100507233  
ANKRD29  
ADM  
LOC440934  
NEU1  
CYP2U1  
EPAS1  
XLOC\_002821  
SOAT1  
XLOC\_002997  
LOC728978  
PLEKHF1  
XLOC\_014219

SLC22A13  
JAG1  
SLC7A5  
SMOX  
CCDC28B  
PLXNA3  
SH2D1B  
PLD2  
RGS16  
ZSWIM4  
MYBL1  
ARHGEF4  
GRK4  
CCDC89  
PKP1  
AHDC1  
HLA-A  
LCA5  
RASSF4  
NFKBIZ  
LOC100506188  
VSIG8  
SLC25A41  
XLOC\_013370  
OSM  
GDPD5  
PLK3  
C15orf62  
DZANK1  
LOC200609  
LOC100507109  
HABP4  
MITF  
HKDC1  
DOCK4  
CRYM  
LPHN1  
ENO2  
XLOC\_011359  
XLOC\_006195  
H1F0  
RAB11FIP1  
XLOC\_013559  
GABBR1  
MPP2  
CTIF  
XLOC\_003417  
LOC100507347

CABLES2  
KSR1  
AMICA1  
C8orf66  
CLGN  
LOC100129171  
BMP6  
SEMA4D  
XLOC\_008209  
XLOC\_013602  
SYNGR3  
SLC25A27  
SLC45A4  
AQP7P1  
MSX1  
NRGN  
TSHZ2  
XLOC\_010245  
XLOC\_002069  
TIPARP  
JAK3  
LOC100131581  
POLN  
SNTA1  
XLOC\_014369  
TNFRSF25  
EPOR  
PPP1R15B  
XLOC\_012169  
SLC29A4  
SECTM1  
TTLL6  
SOBP  
MEF2C  
VWA5B2  
NOS1AP  
IL36G  
LINC00312  
UBTD1  
LRP4  
DMPK  
RASA4  
FBXO44  
CAMTA1  
ULBP2  
FSTL3  
XLOC\_12\_003792  
C9orf72



FAM126B  
EHD1  
CLIP2  
ZDHHC11B  
RHOF  
METRNL  
PRKCG  
ACTA1  
MERTK  
XLOC\_010591  
C1orf201  
ASNS  
S1PR2  
XLOC\_12\_001134  
TMEM25  
GFOD1  
XLOC\_001338  
SYCE2  
NAP1L5  
XLOC\_013955  
SPIRE2  
KALRN  
ASGR1  
DNAH17  
SLC25A25  
COLEC11  
FLT3LG  
PDGFB  
SPOCD1  
GRASP  
FILIP1L  
SAMD14  
DUSP5P  
XLOC\_011513  
PREX1  
IQCJ-SCHIP1  
LMCD1  
ABCA3  
CPLX3  
XLOC\_002277  
LILRB3  
SORBS1  
SEC14L4  
LOC497257  
CMTM2  
IGSF9  
CECR2  
RELT

PPP1R14C  
SLC6A13  
LOC100288911  
PTHLH  
LOC100505573  
FLJ26086  
TSC22D3  
CEBPB  
XLOC\_004557  
PEG10  
KLF4  
SLC30A2  
LOC151657  
MFAP3L  
ABCB9  
XLOC\_12\_003674  
HMOX1  
XLOC\_011614  
ELFN2  
NEDD9  
XLOC\_002872  
GPC2  
TNNC1  
CAPN5  
RASIP1  
XLOC\_012567  
PCK1  
SPRR1A  
LOC388242  
RNASE1  
ADRB1  
LOC100507959  
EIF5A2  
IER5  
CSRNP1  
SPINK2  
XLOC\_12\_000804  
LOC285147  
MYZAP  
XLOC\_014402  
LOC100507800  
NUMBL  
XLOC\_013549  
UCN2  
TPST1  
sept-03  
ProSAPiP1  
TCAP

LOC606724  
ABHD8  
XLOC\_002231  
LCAT  
EPPK1  
SLC1A4  
EGFL7  
CREB5  
FAM18B2-CDRT4  
FBXL16  
XLOC\_011287  
SPOCK2  
MAPRE3  
EREG  
AOC3  
XLOC\_001788  
GLIS3-AS1  
FLYWCH1  
C7orf63  
TRIM36  
TOM1L2  
LOC100508950  
FAM65C  
SH3PXD2B  
C3orf45  
MSX2P1  
AASS  
XLOC\_12\_007427  
CD274  
PTGIR  
TIMP2  
XLOC\_008488  
BMP2  
LINC00163  
TNFRSF10B  
DNAH12  
GBX2  
XLOC\_011331  
MAP1A  
XLOC\_007504  
SYT11  
WWC2  
BAIAP2  
C3  
GDF15  
XLOC\_000695  
XLOC\_000478  
CILP2

ETNK2  
GNG4  
RHEBL1  
VKORC1  
RPS6KA2  
XG  
BCORL1  
DUSP8  
CTAG1A  
IL17RD  
IL21R  
TMEM35  
PTGS1  
ITGA7  
XLOC\_013093  
ENTPD8  
KLHL25  
CDON  
ERN1  
XLOC\_010275  
XLOC\_010743  
CD19  
C16orf79  
LOC100129119  
XLOC\_002296  
KIAA0509  
BATF3  
RFPL3-AS1  
GSTM2  
DBP  
PDLIM7  
CDKN1C  
SLC4A11  
XLOC\_002650  
RCAN2  
LOC100287415  
PNPLA1  
DENND3  
CALHM3  
GPR111  
HPX  
ASAP3  
LOC100131043  
XLOC\_12\_013153  
LOC100131551  
ERRFI1  
XLOC\_12\_014191  
NBEAP1

C14orf49  
C2orf53  
XLOC\_002918  
GATSL3  
XLOC\_011348  
CD52  
CYP2E1  
CTSL1P2  
XLOC\_12\_007783  
MYO1G  
AVPI1  
XLOC\_005747  
BCL3  
XLOC\_12\_002355  
OGDHL  
XLOC\_009880  
OSBP2  
EXT1  
AREG  
XLOC\_003016  
PDE4A  
ARID3A  
BMP8A  
C2CD2L  
MUC21  
CROCCP3  
IL11RA  
XLOC\_12\_004631  
ATP8B3  
METTL20  
CDR2L  
TMEM86A  
ITPRIP  
LOC100507445  
CNNM4  
FLJ44124  
MAK  
SCHIP1  
FNDC4  
IER3  
TOX2  
Q7VLF4  
CYP2G1P  
ADAMTS7  
XLOC\_002732  
GNAZ  
GNG8  
CD7

LOC100130157  
CCDC136  
XLOC\_010670  
LOC400548  
ZP2  
RHOB  
GCGR  
XLOC\_002515  
TTC25  
ZCCHC24  
XLOC\_12\_006812  
IDS  
P2RX7  
TNFRSF4  
MCF2L  
TRIM46  
XLOC\_12\_012942  
CARD14  
PI4KAP1  
FAM69B  
LRRC6  
GP6  
PTGES  
RORA  
CFD  
FTCD  
DKFZp686M1136  
SRRM3  
ST3GAL5  
EID3  
C8orf31  
PPP1R15A  
XLOC\_009196  
TBC1D10C  
ABLIM2  
XLOC\_004584  
EEF1DP3  
FLJ42392  
XLOC\_014336  
TEX19  
MAP3K14  
EGR1  
CD83  
XLOC\_12\_006944  
LOC400927  
MFNG  
LOC100132474  
GARNL3

LINC00051  
C2orf57  
ATAD3C  
BDKRB1  
PPP2R5B  
SLC45A1  
FLJ23152  
GJD3  
SLC25A34  
FXVD4  
MYT1L  
KRT16P2  
PLA2G4E  
RFPL4A  
KRT83  
MGC23284  
EFEMP2  
XLOC\_013776  
DLX1  
TAS1R3  
XLOC\_12\_015752  
XLOC\_12\_013256  
KRT80  
LOC100506252  
FLJ41484  
CLDN17  
ADCY9  
SNPH  
XLOC\_002523  
GPR155  
XLOC\_001462  
LOC157562  
LOC441268  
IRF1  
KCNJ18  
AKAP2  
PHACTR3  
XLOC\_12\_013500  
SIRT4  
XLOC\_005784  
FAM183A  
RELB  
TMEM63C  
C17orf72  
CHKA  
RTN2  
PRRT2  
CCR10

XLOC\_007598  
ADORA2A  
GLIPR2  
WISP2  
CADM4  
CXorf59  
ZIC3  
RCOR2  
XLOC\_000856  
NOX5  
GJA3  
MAN1C1  
RASGRP2  
PACSIN3  
TBXA2R  
PIM1  
XLOC\_014018  
TMEM158  
SLC4A9  
MGC15885  
LOC100505619  
DKFZp451A211  
SBSN  
FOS  
CAMK2N2  
NFKBIA  
NFKB2  
BIK  
SLC38A4  
CCDC151  
XLOC\_002322  
LOC100288432  
XLOC\_011827  
ARID5A  
XLOC\_12\_012552  
NACAD  
XLOC\_011081  
DMBX1  
FAM46C  
ZSWIM6  
ABTB2  
FGF1  
ARID3B  
XLOC\_12\_010386  
CITED4  
XLOC\_012209  
GDPD3  
XLOC\_12\_008760



CYP2F1  
SH2D5  
LOC286114  
XLOC\_12\_015265  
LOC100127983  
XLOC\_000545  
LOC729040  
RAB42  
ARAP3  
XLOC\_004598  
OLFML2A  
LINC00087  
XLOC\_004325  
HIC1  
VEGFA  
XLOC\_001313  
RNF24  
DDIT4  
XLOC\_011559  
HAL  
SESN2  
ATP1B2  
PTAFR  
POU2F2  
PLIN4  
ABCG1  
SPEF1  
DYRK3  
KIAA1683  
DIRAS3  
RGS11  
SHANK3  
CPEB4  
WFIKKN1  
SH2B2  
APOE  
GGT8P  
TDRD6  
LMTK3  
KLK7  
ITIH4  
KLHL32  
PPM1J  
SCN3B  
XLOC\_008989  
XLOC\_013535  
LOC283403  
NGFR

MOG  
RNU11  
DFNB31  
ZNF204P  
LOC728208  
ICAM5  
PER1  
C8orf60  
XLOC\_12\_009332  
LCN6  
LOC399708  
GK2  
SELM  
TUFT1  
UNC5B  
PADI3  
C10orf129  
XLOC\_12\_011987  
C20orf152  
LOC100653515  
XLOC\_009810  
LOC254896  
LRRC9  
CBX4  
XLOC\_000220  
XLOC\_010933  
HAS3  
BRSK2  
PXK  
BMF  
LOC100652839  
LOC340335  
PPP1R14D  
GPRC5B  
XLOC\_000111  
CD1E  
PLA2G2F  
CATSPERB  
BAIAP3  
XLOC\_006495  
XLOC\_006951  
EGR2  
XLOC\_006421  
LOC283404  
RDH12  
VAV1  
MTMR7  
HBA2

LOC100505697  
MICALCL  
GATA5  
XLOC\_005763  
PP14571  
LOC100653007  
LOC100505583  
ARHGAP30  
TNFRSF10C  
SLC9A1  
LOC100507131  
CERCAM  
HBEGF  
CYR61  
SLC25A42  
XLOC\_000208  
TUBB3  
HSFY2  
PGF  
MAP1LC3A  
DSG3  
XLOC\_12\_000018  
XLOC\_12\_009292  
LRRC10B  
SDC4  
RNF112  
BAI2  
NEBL  
XLOC\_007835  
Q29HP5  
LOC100131355  
PDE2A  
MATN4  
XLOC\_12\_002351  
DUSP1  
SCARF2  
CDH15  
LOC100507930  
C1orf130  
CYTH3  
LINC00032  
KLHL29  
PPFIA4  
LOC100499221  
XLOC\_006150  
CCDC65  
DUSP10  
LOC100507039

MYBPHL  
XLOC\_12\_000116  
LOC283143  
LYST  
XLOC\_007191  
PTPRU  
NFKBIE  
OSBPL6  
XLOC\_011047  
KLRD1  
XLOC\_12\_000735  
XLOC\_010942  
DLX3  
LYPD5  
ADM2  
HES4  
XLOC\_002688  
FKBP1B  
DBNL  
KEL  
ADCY4  
IL8  
NPW  
C17orf99  
WNT5B  
CLTCL1  
WDR69  
SERPINI1  
TFCP2L1  
FGF21  
FCHO1  
ANKRD34A  
IL32  
GPR83  
FHAD1  
RAB3IL1  
KLF9  
BBC3  
CDKN2B  
KRT12  
SERTM1  
MOGAT1  
LOC100505869  
CERS1  
KRTAP1-3  
CTRC  
XLOC\_007189  
TMCC2

PEAR1  
TNFAIP2  
CD84  
CSRP2  
ARL4C  
FP588  
AHNAK2  
DPPA2  
ZBTB46  
PRPH  
SUSD3  
XLOC\_003130  
DDIT3  
SYT12  
EFNA3  
TRPV6  
XLOC\_12\_003737  
FOSB  
LOC728228  
REEP2  
STOM  
MIOX  
NRTN  
SH2B3  
CCR7  
RAB3A  
LYL1  
ABAT  
AGPAT4-IT1  
ESPNL  
DHDH  
N4BP3  
ANKRD35  
PPP4R4  
LOC100507162  
VWCE  
LOC283674  
PRDM1  
SNAI3  
CHST6  
ULBP1  
MPP1  
CHD5  
ADRA2B  
XLOC\_011080  
LOC100506662  
GP1BB  
DLK2

KRT42P  
FBXO2  
TMEM169  
GPSM1  
ASB2  
XLOC\_009601  
HAPLN3  
ARL4D  
KRT86  
PIP5KL1  
DPF1  
TNFRSF18  
CXCL3  
TMEM151A  
APC2  
HSPA12A  
CYTH4  
COL7A1  
LINC00319  
TMOD2  
LOC100507002  
GPR37L1  
XLOC\_001366  
ZMYND10  
SCAMP5  
CORO1A  
ELOVL3  
USP2  
NAT8L  
XLOC\_002878  
CSF2  
SLC19A3  
XLOC\_005991  
RGL1  
DLX2  
HEG1  
UAP1L1  
LOC100506120  
CDY2A  
KCNQ1OT1  
XLOC\_014226  
ATF3  
IL11  
XLOC\_12\_006036  
BPIFB1  
sept-06  
ASPHD2  
XLOC\_009167

C3orf32  
DUSP5  
KRT14  
ARC  
MAP3K12  
HYAL1  
RASL10A  
SERPINE1  
DPF3  
WBSCR28  
LOC284570  
XLOC\_12\_006021  
C11orf86  
FAM43A  
PBX4  
TNFRSF9  
SRCIN1  
XLOC\_008611  
CCK  
LGALS1  
C1QL4  
ICAM1  
RHOV  
IL1A  
IFITM10  
SMARCD3  
VPS37D  
KIAA0513  
SERPINB9  
LOC643037  
SCN4B  
NXPH4  
GADD45B  
HES7  
RIMS3  
XLOC\_12\_011908  
IL4I1  
XLOC\_013743  
VASN  
RND1  
KRT17  
MLXIPL  
SYNPO  
TUBB2B  
DHH  
CDKN1A  
NTN5  
GEM

GPR20  
HOXC12  
LYPD3  
MICB  
CHAC1  
FAM46B  
C9orf169  
LRRC25  
BEST1  
SNAI1  
TNFSF9  
XLOC\_004244  
PLIN5  
BDKRB2  
SOCS3  
LOC93463  
KLC3  
LOC100288175  
CBS  
NR4A3  
NEURL3  
CXCL2  
EDN2  
PLK5  
CXCL1  
ADC  
TNFAIP3  
LOC731779  
TMEM121  
SLC2A4  
BIRC3  
LOC100506546  
XLOC\_000027  
ABCG4  
IL10RA  
FSCN1  
RRAD  
COL1A1  
KREMEN2  
IL1B  
ADRB2  
JSRP1  
ICAM4  
DACT3  
CEND1  
SEMA7A  
IL17C  
CYP1A1



CREB3L3  
TNF  
SH2D3C  
CCL20  
ANGPTL4

---

\_\_\_\_\_

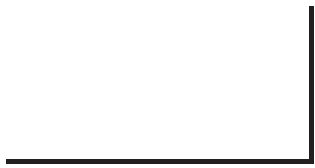

Supplement: oncotarget-07-7161-s002.pdf [file oncotarget-07-7161-s002.pdf]
