# Supplementary material for: The probiotic Propionibacterium freudenreichii as a new adjuvant for TRAIL-based therapy in colorectal cancer
Source: PubMed Central journal article supplement (PMC4872776; doi:10.18632/oncotarget.6881), 2016-01-11
Supplement: oncotarget-07-7161-s001.pdf [file oncotarget-07-7161-s001.pdf]

## SUPPLEMENTARY TABLES

**Supplementary Table S1: List of genes overexpressed in cells treated with either TRAIL or C3/C2 or SN, or TRAIL+C3/C2 or TRAIL+SN.**

See Supplementary File S1

**Supplementary Table S2: KEGG pathway enrichment analysis of genes overexpressed in treated cells using FatiGO tool.** List of genes are compared with genome and the significance of KEGG pathway enrichment was indicated as p-value. KEGG ID: KEGG Identifier. Hsa: homosapiens.

See Supplementary File S2
