# Supplementary material for: The probiotic Propionibacterium freudenreichii as a new adjuvant for TRAIL-based therapy in colorectal cancer
Source: PubMed Central journal article supplement (PMC4872776; doi:10.18632/oncotarget.6881), 2016-01-11
Supplement: oncotarget-07-7161-s003.pdf [file oncotarget-07-7161-s003.pdf]

**Supplementary Table 2 :**

| <b>TRAIL-SN</b> |                   | <b>TRAIL-C3/C2</b> |                   | <b>TRAIL</b>   |                   |
|-----------------|-------------------|--------------------|-------------------|----------------|-------------------|
| <b>KEGG ID</b>  | <b>adj_pvalue</b> | <b>KEGG ID</b>     | <b>adj_pvalue</b> | <b>KEGG ID</b> | <b>adj_pvalue</b> |
| hsa04060        | 7,88E-11          | hsa04010           | 1,12E-19          | hsa04060       | 4,09E-15          |
| hsa05200        | 1,48E-10          | hsa04360           | 3,41E-13          | hsa04621       | 1,68E-07          |
| hsa04010        | 1,48E-10          | hsa04020           | 1,63E-12          | hsa05200       | 4,48E-06          |
| hsa00562        | 1,48E-10          | hsa05200           | 3,19E-12          | hsa04630       | 2,23E-05          |
| hsa04070        | 4,02E-10          | hsa04060           | 9,40E-11          | hsa04640       | 2,37E-05          |
| hsa04360        | 2,20E-08          | hsa04510           | 5,12E-10          | hsa04620       | 4,22E-05          |
| hsa04020        | 6,82E-08          | hsa04916           | 1,83E-09          | hsa04062       | 7,50E-05          |
| hsa04340        | 7,15E-08          | hsa04062           | 5,92E-09          | hsa04210       | 1,37E-04          |
| hsa05217        | 1,07E-07          | hsa04512           | 5,92E-09          | hsa04622       | 4,09E-04          |
| hsa04810        | 4,26E-07          | hsa00562           | 1,28E-08          | hsa04650       | 8,30E-04          |
| hsa04920        | 8,97E-07          | hsa04660           | 2,91E-08          | hsa04623       | 1,45E-03          |
| hsa04512        | 8,97E-07          | hsa04080           | 3,34E-08          | hsa05222       | 1,64E-03          |
| hsa04916        | 1,04E-06          | hsa04070           | 3,34E-08          | hsa04660       | 3,17E-03          |
| hsa04670        | 1,15E-06          | hsa04670           | 3,36E-08          | hsa05120       | 3,65E-03          |
| hsa04930        | 1,95E-06          | hsa05217           | 3,92E-08          | hsa05219       | 4,60E-03          |
| hsa04510        | 1,95E-06          | hsa04810           | 5,19E-08          | hsa04010       | 4,96E-03          |
| hsa04912        | 3,57E-06          | hsa04144           | 8,43E-08          | hsa04514       | 8,02E-03          |
| hsa04640        | 6,07E-06          | hsa04722           | 1,88E-07          | hsa05218       | 2,59E-02          |
| hsa04960        | 6,08E-06          | hsa04115           | 5,33E-07          | hsa04920       | 2,59E-02          |
| hsa04062        | 1,32E-05          | hsa04340           | 7,32E-07          | hsa04662       | 2,73E-02          |
| hsa04630        | 1,32E-05          | hsa04664           | 7,91E-07          | hsa05220       | 3,02E-02          |
| hsa00564        | 1,34E-05          | hsa04912           | 1,41E-06          | hsa04360       | 3,02E-02          |
| hsa04270        | 1,90E-05          | hsa04960           | 1,50E-06          | hsa04672       | 3,82E-02          |
| hsa04910        | 1,98E-05          | hsa04662           | 1,50E-06          | hsa05340       | 3,82E-02          |
| hsa04144        | 3,90E-05          | hsa04150           | 2,05E-06          | hsa05215       | 4,35E-02          |
| hsa04080        | 4,00E-05          | hsa04930           | 2,77E-06          | hsa04512       | 4,71E-02          |
| hsa05410        | 4,00E-05          | hsa04012           | 2,90E-06          | hsa00740       | 4,74E-02          |
| hsa00561        | 4,04E-05          | hsa04920           | 2,90E-06          |                |                   |
| hsa04664        | 4,04E-05          | hsa04310           | 5,30E-06          |                |                   |
| hsa00532        | 6,80E-05          | hsa04666           | 6,69E-06          |                |                   |
| hsa04666        | 6,96E-05          | hsa04270           | 7,95E-06          |                |                   |
| hsa04310        | 8,04E-05          | hsa05414           | 1,71E-05          |                |                   |
| hsa04710        | 9,50E-05          | hsa04910           | 1,71E-05          |                |                   |
| hsa00051        | 1,20E-04          | hsa00230           | 2,29E-05          |                |                   |
| hsa00533        | 1,28E-04          | hsa04914           | 2,29E-05          |                |                   |
| hsa04012        | 1,30E-04          | hsa00330           | 2,99E-05          |                |                   |
| hsa00260        | 1,98E-04          | hsa04370           | 3,86E-05          |                |                   |
| hsa04722        | 2,93E-04          | hsa05221           | 4,90E-05          |                |                   |
| hsa04530        | 3,01E-04          | hsa05410           | 4,90E-05          |                |                   |
| hsa05219        | 3,01E-04          | hsa05219           | 4,90E-05          |                |                   |
| hsa05414        | 4,44E-04          | hsa00590           | 5,56E-05          |                |                   |
| hsa04520        | 5,15E-04          | hsa00564           | 5,85E-05          |                |                   |

|          |          |          |          |
|----------|----------|----------|----------|
| hsa04115 | 5,73E-04 | hsa04110 | 5,97E-05 |
| hsa05130 | 6,07E-04 | hsa05211 | 5,97E-05 |
| hsa05120 | 7,63E-04 | hsa00380 | 6,95E-05 |
| hsa00565 | 7,83E-04 | hsa04350 | 6,95E-05 |
| hsa03320 | 9,97E-04 | hsa04710 | 7,91E-05 |
| hsa04150 | 9,97E-04 | hsa04530 | 7,97E-05 |
| hsa04540 | 1,03E-03 | hsa05215 | 8,38E-05 |
| hsa04660 | 1,03E-03 | hsa00260 | 1,94E-04 |
| hsa04210 | 1,03E-03 | hsa04114 | 1,97E-04 |
| hsa05412 | 1,09E-03 | hsa05218 | 1,97E-04 |
| hsa00510 | 1,25E-03 | hsa00532 | 2,30E-04 |
| hsa04142 | 1,30E-03 | hsa04210 | 2,88E-04 |
| hsa05221 | 1,31E-03 | hsa00410 | 2,90E-04 |
| hsa00600 | 1,55E-03 | hsa05120 | 2,90E-04 |
| hsa04350 | 1,83E-03 | hsa04540 | 2,90E-04 |
| hsa04662 | 2,28E-03 | hsa00533 | 2,90E-04 |
| hsa04620 | 2,44E-03 | hsa05214 | 2,90E-04 |
| hsa04610 | 2,44E-03 | hsa04630 | 3,11E-04 |
| hsa04730 | 2,44E-03 | hsa04640 | 3,51E-04 |
| hsa04650 | 2,44E-03 | hsa04730 | 3,82E-04 |
| hsa05340 | 3,72E-03 | hsa04610 | 3,95E-04 |
| hsa05222 | 3,91E-03 | hsa00051 | 4,79E-04 |
| hsa00250 | 3,96E-03 | hsa05222 | 4,79E-04 |
| hsa02010 | 3,96E-03 | hsa04620 | 6,68E-04 |
| hsa00330 | 3,96E-03 | hsa04330 | 6,71E-04 |
| hsa04330 | 3,96E-03 | hsa05020 | 7,13E-04 |
| hsa00910 | 4,11E-03 | hsa00120 | 8,94E-04 |
| hsa00534 | 4,11E-03 | hsa00770 | 9,00E-04 |
| hsa05218 | 4,39E-03 | hsa00760 | 1,03E-03 |
| hsa00380 | 4,87E-03 | hsa00450 | 1,03E-03 |
| hsa05215 | 5,75E-03 | hsa04320 | 1,03E-03 |
| hsa00120 | 7,14E-03 | hsa00270 | 1,49E-03 |
| hsa00590 | 7,14E-03 | hsa00600 | 1,56E-03 |
| hsa00601 | 8,49E-03 | hsa00250 | 2,00E-03 |
| hsa04514 | 8,69E-03 | hsa00531 | 2,00E-03 |
| hsa04370 | 8,94E-03 | hsa04621 | 2,07E-03 |
| hsa00531 | 1,14E-02 | hsa05130 | 2,07E-03 |
| hsa00563 | 1,14E-02 | hsa05412 | 2,23E-03 |
| hsa00760 | 1,24E-02 | hsa04520 | 2,27E-03 |
| hsa05210 | 1,35E-02 | hsa04720 | 2,27E-03 |
| hsa05211 | 1,43E-02 | hsa00561 | 2,30E-03 |
| hsa04320 | 1,43E-02 | hsa04142 | 2,49E-03 |
| hsa00020 | 1,71E-02 | hsa05210 | 2,81E-03 |
| hsa04720 | 1,79E-02 | hsa04650 | 2,92E-03 |
| hsa00450 | 1,98E-02 | hsa04742 | 3,23E-03 |
| hsa00052 | 2,00E-02 | hsa05014 | 3,23E-03 |
| hsa00750 | 2,07E-02 | hsa00510 | 3,26E-03 |
| hsa00511 | 2,13E-02 | hsa00565 | 3,32E-03 |

|          |          |          |          |
|----------|----------|----------|----------|
| hsa05214 | 2,15E-02 | hsa03320 | 3,32E-03 |
| hsa04621 | 2,54E-02 | hsa03450 | 3,32E-03 |
| hsa00010 | 2,64E-02 | hsa04130 | 3,32E-03 |
| hsa05014 | 2,73E-02 | hsa00130 | 3,32E-03 |
| hsa05213 | 2,81E-02 | hsa00430 | 3,32E-03 |
| hsa04260 | 2,99E-02 | hsa05223 | 3,97E-03 |
| hsa03450 | 3,33E-02 | hsa00534 | 3,99E-03 |
| hsa00730 | 3,33E-02 | hsa05212 | 4,68E-03 |
| hsa00740 | 3,33E-02 | hsa00511 | 6,10E-03 |
| hsa00400 | 3,33E-02 | hsa00480 | 6,52E-03 |
| hsa00130 | 3,33E-02 | hsa04622 | 6,52E-03 |
| hsa04742 | 3,36E-02 | hsa02010 | 7,32E-03 |
| hsa04130 | 3,36E-02 | hsa04260 | 7,32E-03 |
| hsa04622 | 3,36E-02 | hsa00030 | 7,38E-03 |
| hsa04114 | 3,42E-02 | hsa05213 | 7,61E-03 |
| hsa00340 | 3,89E-02 | hsa00360 | 7,74E-03 |
| hsa00360 | 4,21E-02 | hsa00601 | 7,74E-03 |
| hsa00980 | 4,24E-02 | hsa00591 | 7,74E-03 |
| hsa04914 | 4,63E-02 | hsa00563 | 8,37E-03 |
| hsa00592 | 4,71E-02 | hsa00460 | 8,37E-03 |
| hsa00100 | 4,71E-02 | hsa04514 | 1,05E-02 |
|          |          | hsa05220 | 1,06E-02 |
|          |          | hsa00910 | 1,11E-02 |
|          |          | hsa00400 | 1,16E-02 |
|          |          | hsa00020 | 1,20E-02 |
|          |          | hsa00300 | 1,34E-02 |
|          |          | hsa05340 | 1,34E-02 |
|          |          | hsa00785 | 1,34E-02 |
|          |          | hsa00280 | 1,65E-02 |
|          |          | hsa00100 | 1,69E-02 |
|          |          | hsa00592 | 1,69E-02 |
|          |          | hsa00620 | 1,76E-02 |
|          |          | hsa00512 | 1,87E-02 |
|          |          | hsa00071 | 2,58E-02 |
|          |          | hsa04623 | 2,63E-02 |
|          |          | hsa00830 | 2,64E-02 |
|          |          | hsa04950 | 2,64E-02 |
|          |          | hsa03410 | 2,78E-02 |
|          |          | hsa00340 | 2,92E-02 |
|          |          | hsa00740 | 2,92E-02 |
|          |          | hsa00970 | 2,92E-02 |
|          |          | hsa00604 | 2,92E-02 |
|          |          | hsa00980 | 3,25E-02 |
|          |          | hsa05110 | 3,76E-02 |
|          |          | hsa00350 | 3,96E-02 |
|          |          | hsa00730 | 3,96E-02 |
|          |          | hsa00640 | 4,29E-02 |
|          |          | hsa00052 | 4,29E-02 |

|          |          |
|----------|----------|
| hsa04120 | 4,29E-02 |
| hsa00010 | 4,55E-02 |
| hsa00630 | 4,55E-02 |
| hsa00790 | 4,55E-02 |
| hsa00920 | 4,60E-02 |

| SN       |            | C3/C2    |            |
|----------|------------|----------|------------|
| KEGG ID  | adj_pvalue | KEGG ID  | adj_pvalue |
| hsa04010 | 2,70E-11   | hsa00562 | 9,63E-06   |
| hsa04360 | 1,08E-10   | hsa04360 | 1,20E-04   |
| hsa05200 | 9,07E-09   | hsa04020 | 1,20E-04   |
| hsa04020 | 9,07E-09   | hsa05217 | 1,20E-04   |
| hsa04510 | 9,07E-09   | hsa04340 | 1,20E-04   |
| hsa04340 | 9,07E-09   | hsa04070 | 1,20E-04   |
| hsa04060 | 2,68E-08   | hsa04060 | 2,47E-04   |
| hsa00562 | 5,20E-08   | hsa04916 | 2,43E-03   |
| hsa05217 | 1,30E-07   | hsa04010 | 3,52E-03   |
| hsa04070 | 1,30E-07   | hsa00590 | 4,34E-03   |
| hsa04930 | 1,77E-07   | hsa04640 | 4,52E-03   |
| hsa04512 | 1,08E-06   | hsa04144 | 5,15E-03   |
| hsa04920 | 1,79E-06   | hsa05200 | 5,56E-03   |
| hsa00260 | 3,75E-06   | hsa04062 | 1,17E-02   |
| hsa04270 | 4,78E-06   | hsa04930 | 1,31E-02   |
| hsa04916 | 6,84E-06   | hsa04960 | 1,54E-02   |
| hsa04910 | 6,84E-06   | hsa00564 | 1,58E-02   |
| hsa04810 | 7,99E-06   | hsa00330 | 1,58E-02   |
| hsa04144 | 1,54E-05   | hsa04666 | 1,76E-02   |
| hsa04912 | 1,54E-05   | hsa00260 | 1,82E-02   |
| hsa04670 | 1,54E-05   | hsa04664 | 1,82E-02   |
| hsa04664 | 2,16E-05   | hsa04270 | 1,90E-02   |
| hsa04310 | 2,16E-05   | hsa04080 | 1,90E-02   |
| hsa04062 | 2,53E-05   | hsa04920 | 2,09E-02   |
| hsa00564 | 3,57E-05   | hsa04310 | 2,46E-02   |
| hsa04960 | 4,41E-05   | hsa00532 | 2,46E-02   |
| hsa00532 | 8,35E-05   | hsa04650 | 2,46E-02   |
| hsa04630 | 1,15E-04   | hsa00565 | 2,54E-02   |
| hsa05410 | 1,29E-04   | hsa04660 | 2,91E-02   |
| hsa04640 | 1,46E-04   | hsa00980 | 2,93E-02   |
| hsa04080 | 2,05E-04   | hsa04710 | 3,35E-02   |
| hsa04012 | 2,51E-04   | hsa04910 | 3,63E-02   |
| hsa00051 | 2,54E-04   | hsa03320 | 4,36E-02   |
| hsa04370 | 2,69E-04   | hsa04912 | 4,36E-02   |
| hsa04730 | 2,69E-04   | hsa04150 | 4,36E-02   |
| hsa00330 | 2,97E-04   | hsa04670 | 4,55E-02   |
| hsa04530 | 2,97E-04   | hsa04370 | 4,55E-02   |
| hsa05414 | 5,51E-04   | hsa04510 | 4,56E-02   |
| hsa04142 | 5,97E-04   | hsa00830 | 4,56E-02   |
| hsa04722 | 7,41E-04   | hsa04115 | 4,93E-02   |
| hsa04540 | 8,35E-04   |          |            |
| hsa04115 | 9,47E-04   |          |            |

|          |          |
|----------|----------|
| hsa00565 | 1,46E-03 |
| hsa04710 | 1,46E-03 |
| hsa04666 | 1,64E-03 |
| hsa05222 | 1,69E-03 |
| hsa04210 | 1,71E-03 |
| hsa04660 | 2,14E-03 |
| hsa05130 | 2,21E-03 |
| hsa04350 | 2,32E-03 |
| hsa04330 | 2,32E-03 |
| hsa00380 | 2,58E-03 |
| hsa04520 | 2,72E-03 |
| hsa00561 | 2,72E-03 |
| hsa04662 | 2,72E-03 |
| hsa00531 | 3,00E-03 |
| hsa05219 | 3,07E-03 |
| hsa04150 | 3,62E-03 |
| hsa00250 | 4,75E-03 |
| hsa00910 | 5,13E-03 |
| hsa05014 | 7,29E-03 |
| hsa00533 | 7,35E-03 |
| hsa05412 | 7,36E-03 |
| hsa00511 | 8,84E-03 |
| hsa04720 | 9,01E-03 |
| hsa00590 | 9,01E-03 |
| hsa05120 | 1,16E-02 |
| hsa04620 | 1,27E-02 |
| hsa04514 | 1,27E-02 |
| hsa04114 | 1,29E-02 |
| hsa04610 | 1,29E-02 |
| hsa03320 | 1,33E-02 |
| hsa05210 | 1,33E-02 |
| hsa00534 | 1,33E-02 |
| hsa05214 | 1,35E-02 |
| hsa00410 | 1,37E-02 |
| hsa04650 | 1,40E-02 |
| hsa05221 | 1,60E-02 |
| hsa00360 | 1,60E-02 |
| hsa04320 | 1,60E-02 |
| hsa05211 | 1,62E-02 |
| hsa02010 | 2,03E-02 |
| hsa05218 | 2,03E-02 |
| hsa00592 | 2,17E-02 |
| hsa00750 | 2,25E-02 |
| hsa04614 | 2,34E-02 |
| hsa00510 | 2,39E-02 |
| hsa00010 | 2,43E-02 |
| hsa05213 | 2,45E-02 |
| hsa04914 | 2,70E-02 |

|          |          |
|----------|----------|
| hsa00600 | 3,15E-02 |
| hsa00563 | 3,15E-02 |
| hsa00120 | 3,62E-02 |
| hsa00052 | 3,62E-02 |
| hsa00400 | 3,62E-02 |
| hsa00130 | 3,62E-02 |
| hsa05215 | 3,94E-02 |
| hsa00020 | 4,43E-02 |
| hsa00601 | 4,81E-02 |
| hsa04130 | 4,91E-02 |
